# Supplementary material for: A visible-light activated [2 + 2] cycloaddition reaction enables pinpointing carbon–carbon double bonds in lipids
Source: PubMed Central journal article supplement — Chem Sci. 2020 Jun 22;11(27):7244–51. doi: 10.1039/d0sc01149e (PMC8159383; doi:10.1039/d0sc01149e), 2020-06-22
Supplement: SC-011-D0SC01149E-s001.pdf [file SC-011-D0SC01149E-s001.pdf]

## Supplementary Information

### **Visible-Light Activated [2+2] Cycloaddition Reaction Enables Pinpointing Carbon-Carbon Double Bonds in Lipids**

Guifang Feng,<sup>1</sup> Yanhong Hao,<sup>1</sup> Liang Wu,<sup>1</sup> and Suming Chen\*<sup>1</sup>

<sup>1</sup> Institute for Advanced Studies, Wuhan University, Wuhan, Hubei 430072 (China)

E-mail: sm.chen@whu.edu.cn

## Table of Contents

|                                                                                                          |       |
|----------------------------------------------------------------------------------------------------------|-------|
| Supplementary Figures .....                                                                              | 3-14  |
| Fig. S1. Chemical structures of the phospholipid standards.....                                          | 3     |
| Fig. S2. Chemical structures of the fatty acid standards .....                                           | 3     |
| Fig. S3. Optimization of the reaction time of anthraquinone with fatty acid FA 20:1 (11Z).....           | 4     |
| Fig. S4. MS/MS spectra of the VACA reaction products of FA 20:1 (11Z). .....                             | 4     |
| Fig. S5. Comparison of different inject volumes of VACA reaction products of FA 20:1 (11Z).....          | 5     |
| Fig. S6. Comparison of the VACA reaction products between <i>cis</i> -FA and <i>trans</i> -FA 20:1 ..... | 5     |
| Fig. S7. EIC of the VACA reaction products between AQ and FA, TG, LPE and PC.....                        | 6     |
| Fig. S8. Fragmentation pathways of sodiated photocycloaddition products ions of LPE 18:1 (9Z).....       | 6     |
| Fig. S9. Analysis of VACA reaction products of LPE 18:1 (9Z) by LC-MS/MS.....                            | 7     |
| Fig. S10. VACA reaction of anthraquinone with different unsaturated lipids. ....                         | 8     |
| Fig. S11. Base peak ion chromatograms of serum extract before and after VACA reaction.....               | 9     |
| Fig. S12. Mass spectra of PC 38:6 in the serum extract in positive ion mode.....                         | 9     |
| Fig. S13. Matching of the MS/MS spectrum of PC 38:6 at 9.33 min in the Lipid Blast database. ....        | 10    |
| Fig. S14. Matching of the MS/MS spectrum of PC 38:6 at 8.66 min in the Lipid Blast database. ....        | 10    |
| Fig. S15. EICs of the diagnostic ions for PC 18:2_20:4.....                                              | 11    |
| Fig. S16. Identification of the FA 22:6 in the serum extract. ....                                       | 12    |
| Fig. S17. Identification of the TG 56:5 in the serum extract.....                                        | 13    |
| Fig. S18. Matching of the MS/MS spectrum of TG 56:5 at 18.31 min in the Lipid Blast database. ....       | 14    |
| Supplementary Tables .....                                                                               | 15-37 |
| Table S1. Statistics of the lipid numbers identified in human serum extract.....                         | 15    |
| Table S2. Detailed structures of the lipids with the identified C=C bond positions.....                  | 16    |
| Table S3. PC and LPC identified from human serum extract.....                                            | 18    |
| Table S4. PE and LPE identified from human serum extract .....                                           | 25    |
| Table S5. Sphingolipids identified from human serum extract.....                                         | 28    |
| Table S6. TG and DG identified from human serum extract.....                                             | 31    |
| Table S7. Ceramide identified from human serum extract .....                                             | 36    |
| Table S8. FA identified from human serum extract .....                                                   | 37    |

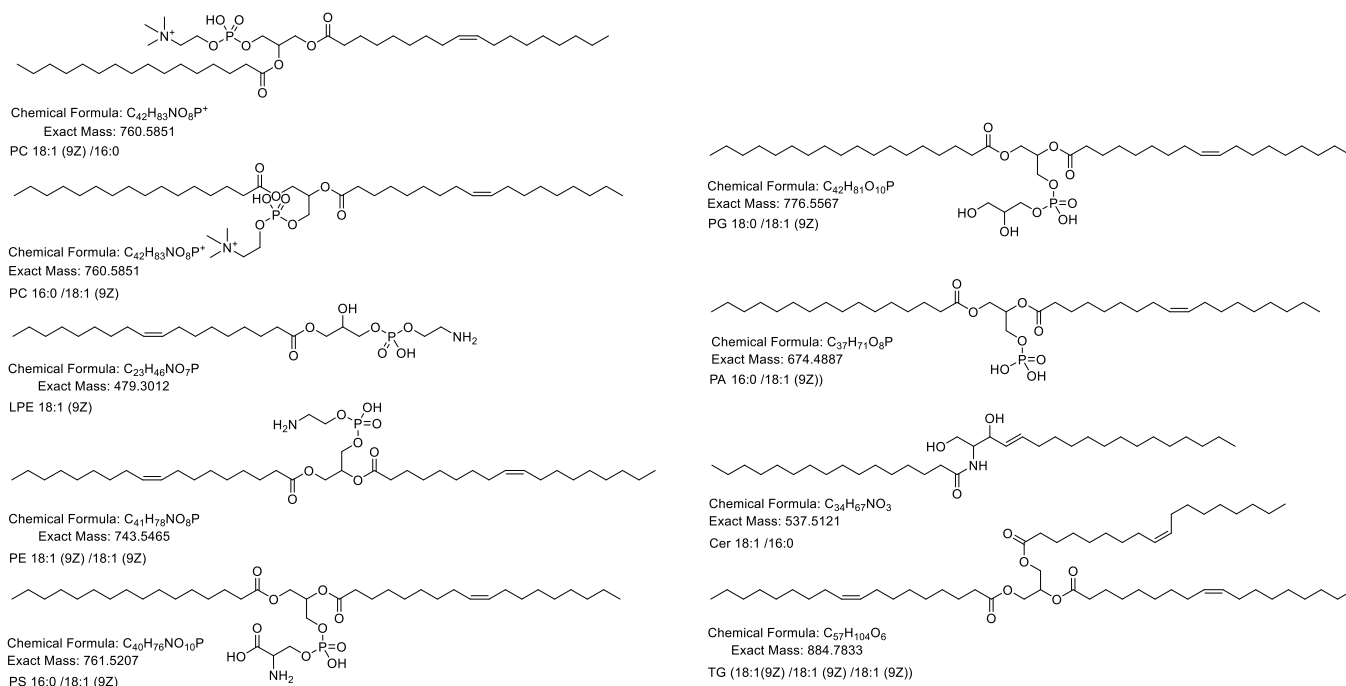

**Fig. S1.** Chemical structures of the phospholipid standards.

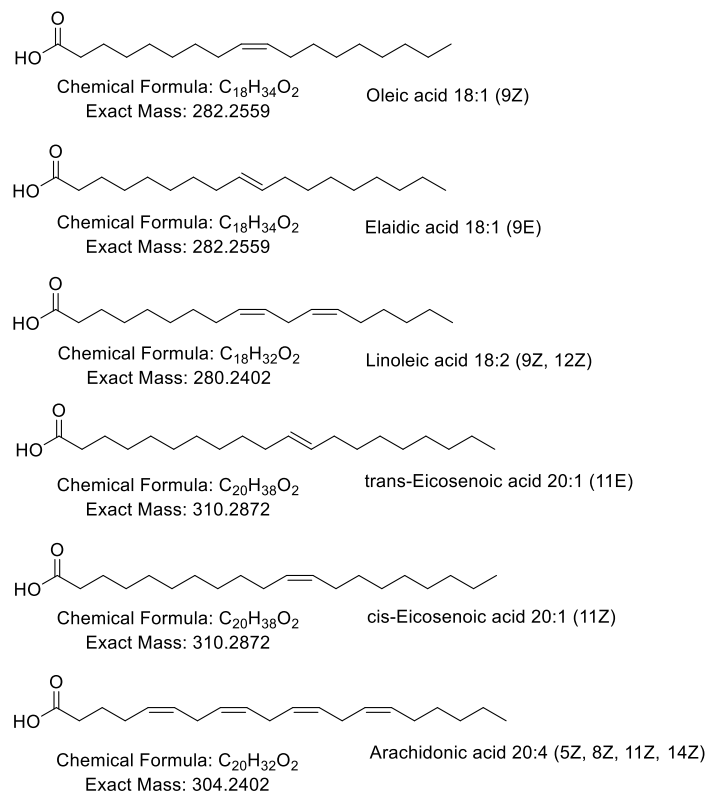

**Fig. S2.** Chemical structures of the fatty acid standards.

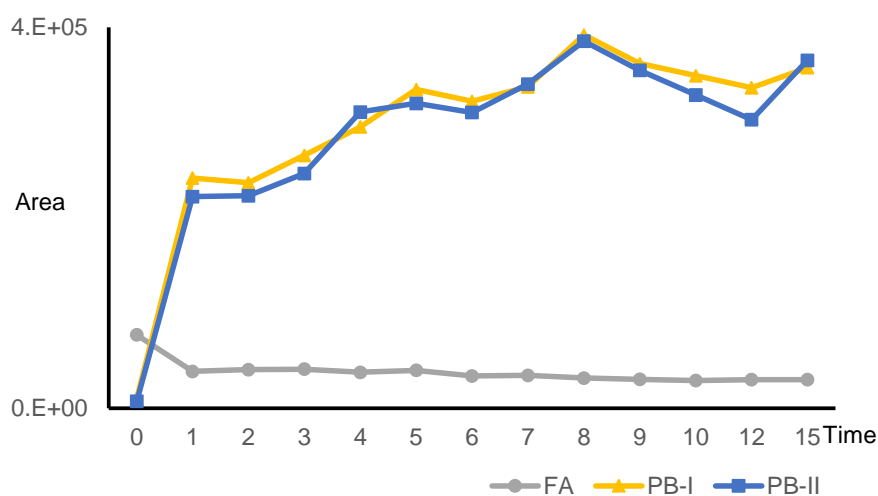

**Fig. S3.** Optimization of the reaction time of anthraquinone with fatty acid FA 20:1 (11Z).

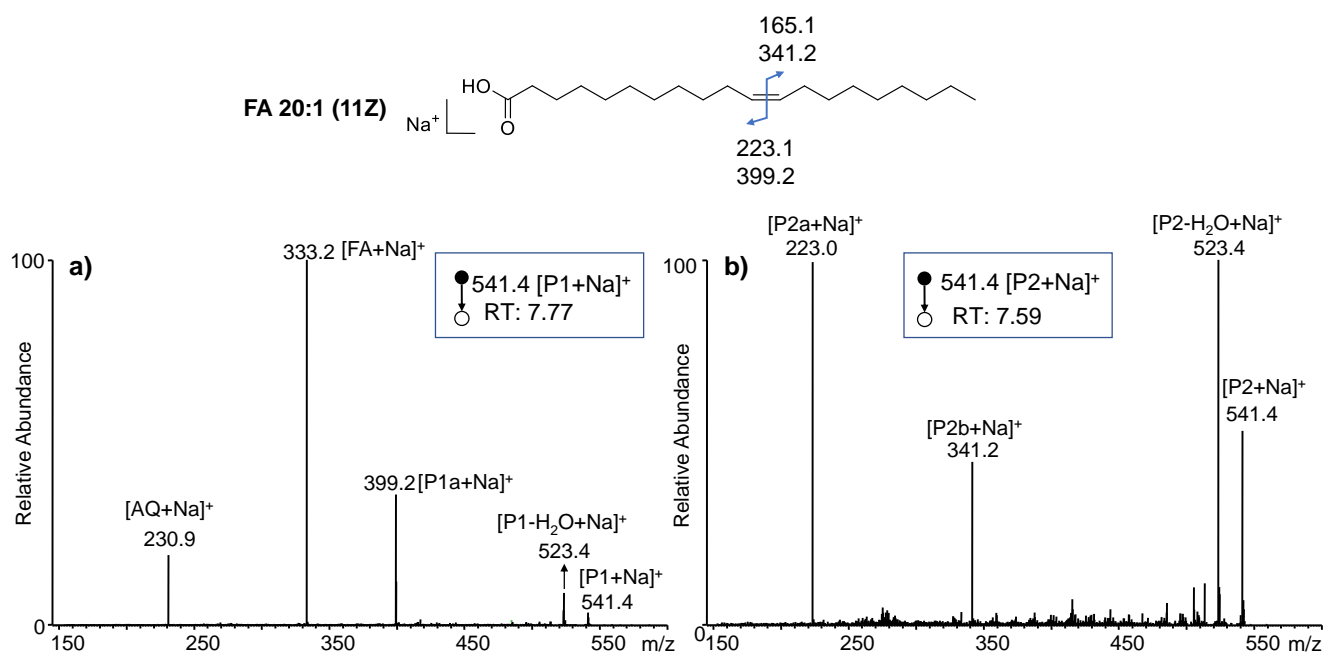

**Fig. S4.** MS/MS spectra of the VACA reaction products of FA 20:1 (11Z) with anthraquinone in the positive ion mode correspond to the EIC peaks at a) 7.77 and b) 7.59 min in liquid chromatography, respectively. The chemical structures on the top shows the positions of C=C bonds and the  $m/z$  values of the possible diagnostic fragment ions of VACA reaction products via CID.

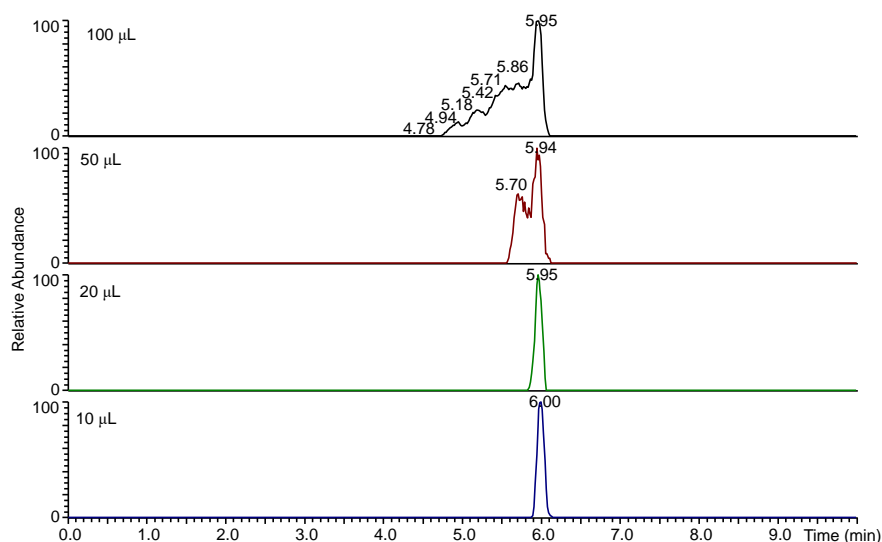

**Fig. S5.** Comparison of different inject volumes (10, 20, 50 and 100  $\mu\text{L}$ ) of VACA reaction products of FA 20:1 (11Z) acquired by LC-MS in the positive ion mode by extracted ion chromatogram (EIC) at  $m/z$  519.3.

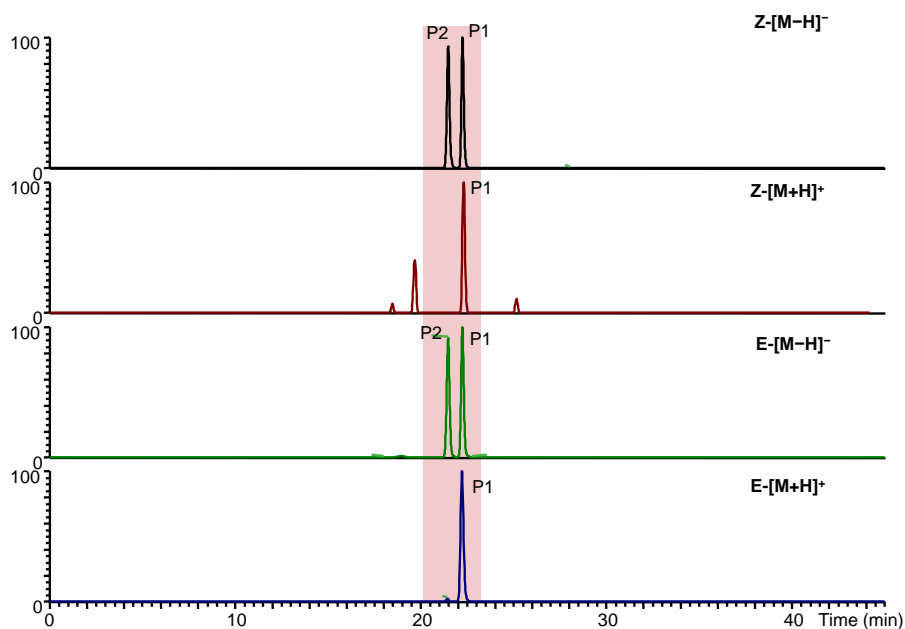

**Fig. S6.** Comparison of the VACA reaction products between *cis*-FA and *trans*-FA 20:1 (11Z and 11E) in both positive ( $m/z$  519.3) and negative ion ( $m/z$  517.3) modes by EICs.

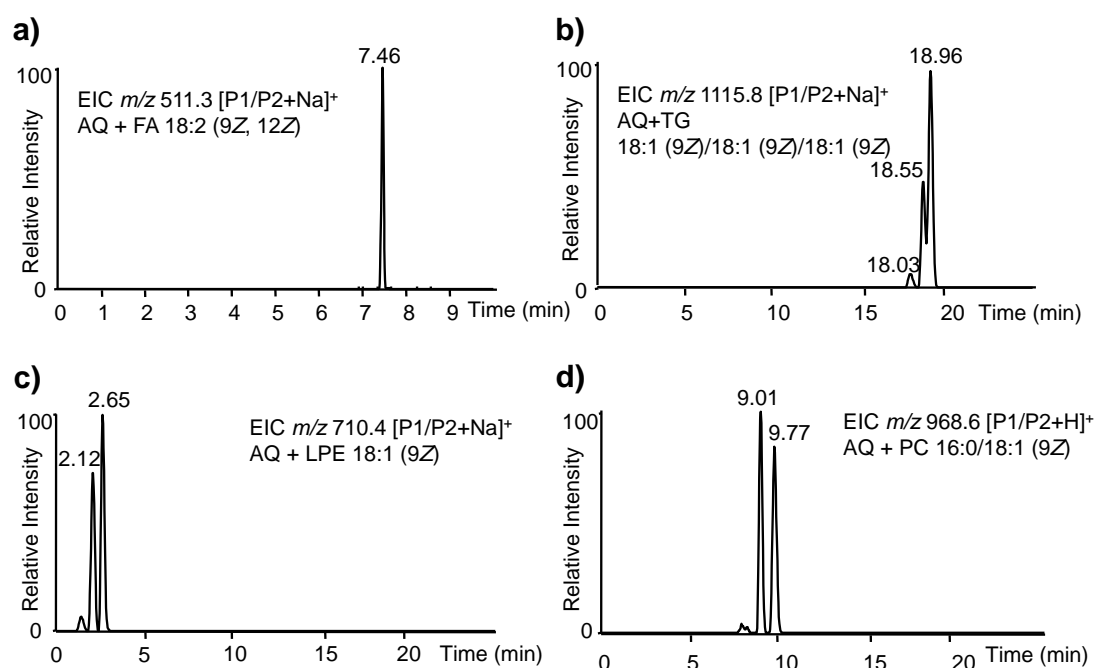

**Fig. S7.** EIC of the VACA reaction products between AQ and a) FA 18:2 (9Z, 12Z), b) TG 18:1 (9Z)/18:1 (9Z) /18:1 (9Z), c) LPE 18:1 (9Z), and d) PC 16:0/18:1 (9Z).

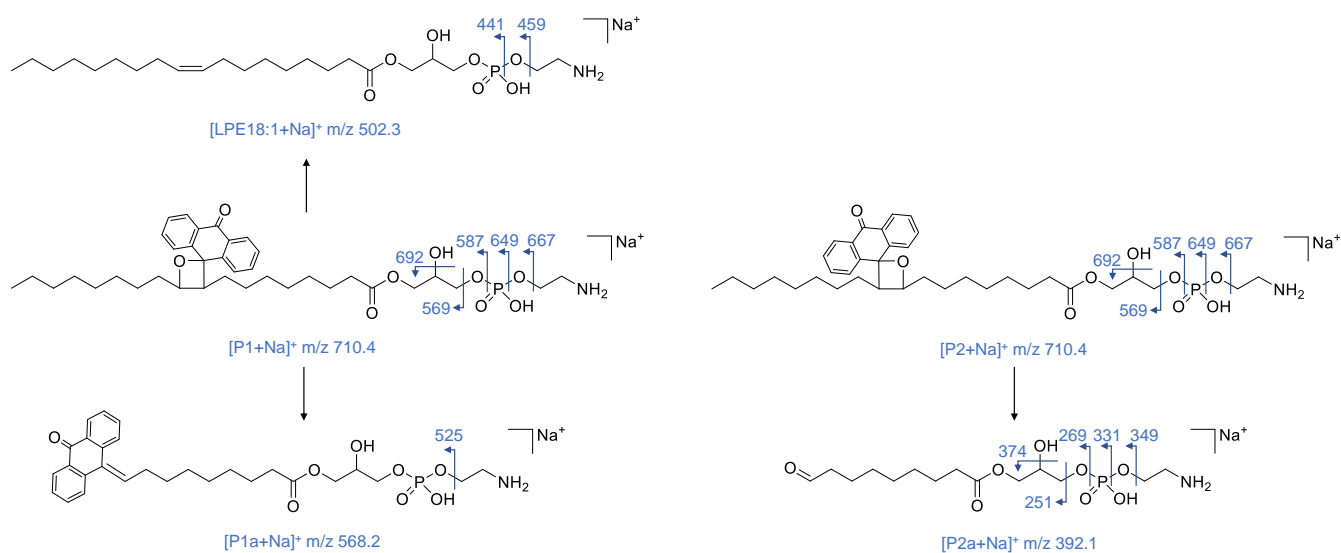

**Fig. S8.** Structures and fragmentation pathways of sodiated photocycloaddition products (P1/P2) ions of LPE 18:1 (9Z) in CID. The figures on each structure correspond to the  $m/z$  values of the formed fragment ions, and the arrows denote the possible positions of fragmentation.

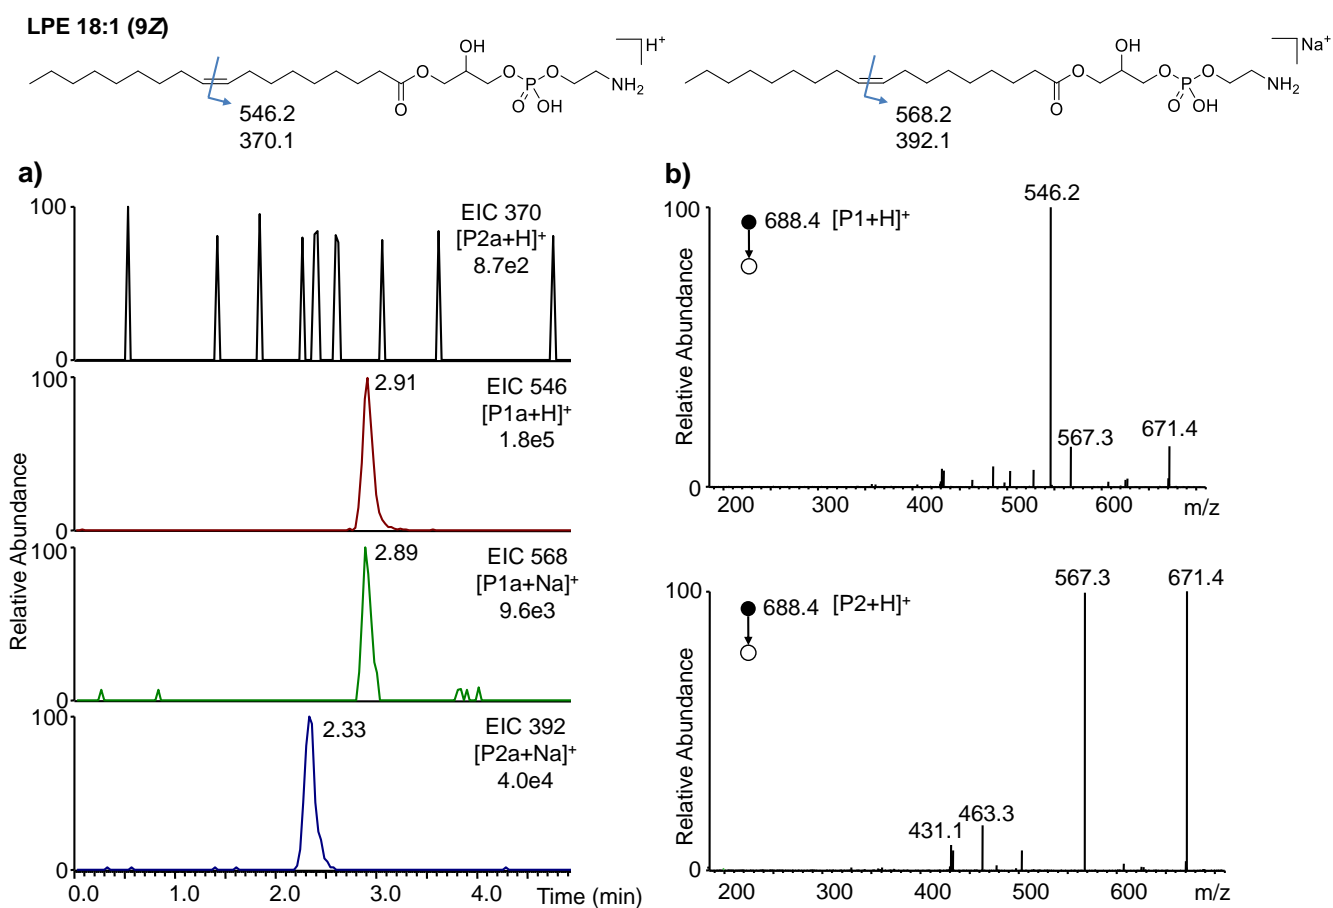

**Fig. S9.** Analysis of VACA reaction products of LPE 18:1 (9Z) with anthraquinone by LC-MS/MS. a) EICs of the ions at  $m/z$  370.1 (corresponds to  $[P2a+H]^+$ ) and  $m/z$  546.2 (corresponds to  $[P1a+H]^+$ ) extracted from the MS/MS spectra of protonated products ( $m/z$  688.4), and EICs of the ions at  $m/z$  568.2 (corresponds to  $[P1a+Na]^+$ ) and  $m/z$  392.1 (corresponds to  $[P2a+Na]^+$ ) from the MS/MS spectra of sodiated products ( $m/z$  710.4) of LPE 18:1 (9Z). b) CID spectra of protonated products P1 (2.91 min) and P2 (2.33 min) of LPE 18:1 (9Z). The chemical structures on the top shows the positions of C=C bonds and the  $m/z$  values of the possible diagnostic fragment ions of VACA reaction products via CID.

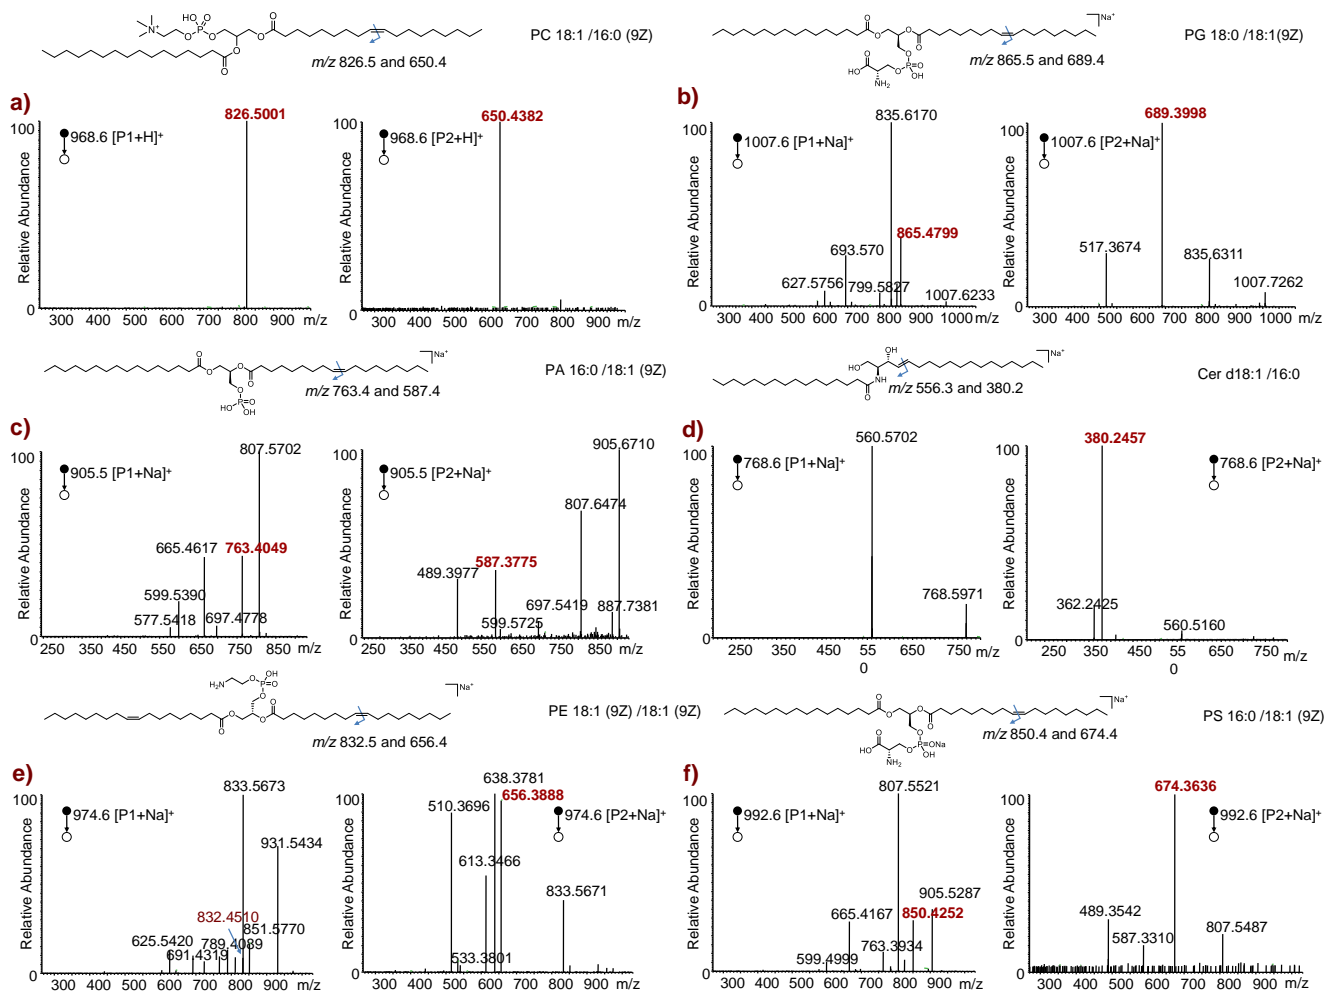

**Fig. S10.** VACA reaction of anthraquinone with different unsaturated lipids. a-f) The MS/MS spectra of the VACA product ions produced from the reaction of anthraquinone with a) 18:1/16:0 (9Z), b) PG 18:0 /18:1 (9Z), c) PA 16:0/18:1 (9Z), d) Cer d18:1 /16:0, e) 18:1 (9Z)/18:1 (9Z) and f) 16:0 /18:1 (9Z). The chemical structures on the top of each MS/MS spectrum shows the positions of C=C bonds and the  $m/z$  values of the possible diagnostic fragment ions of VACA reaction products via CID.



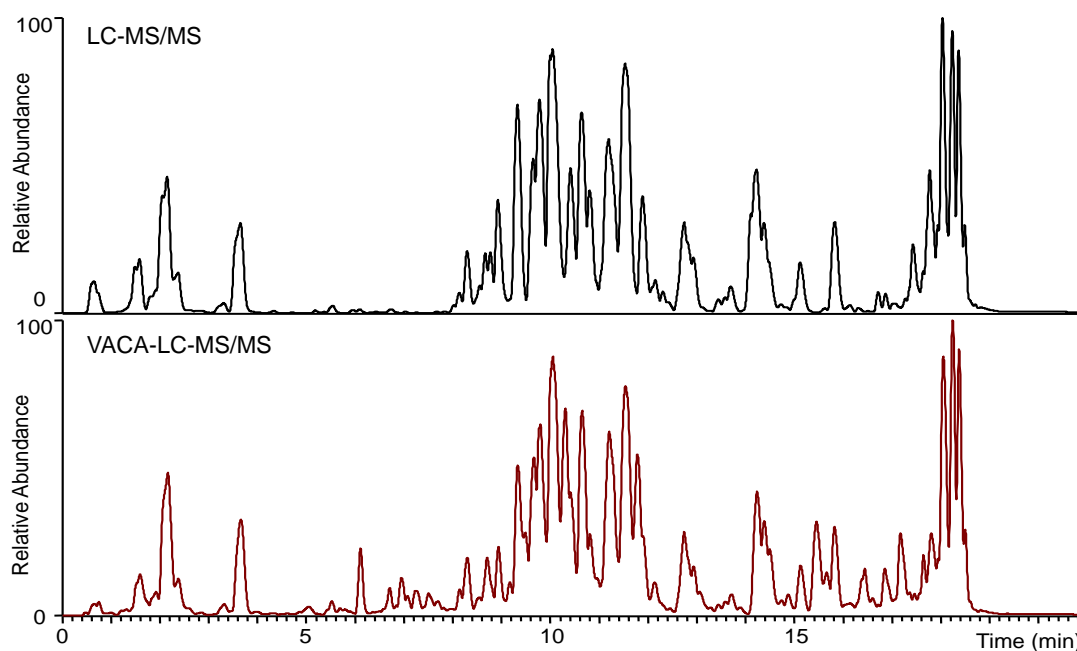

**Fig. S11.** Base peak ion chromatograms of serum extract in positive ion mode before and after VACA reaction.

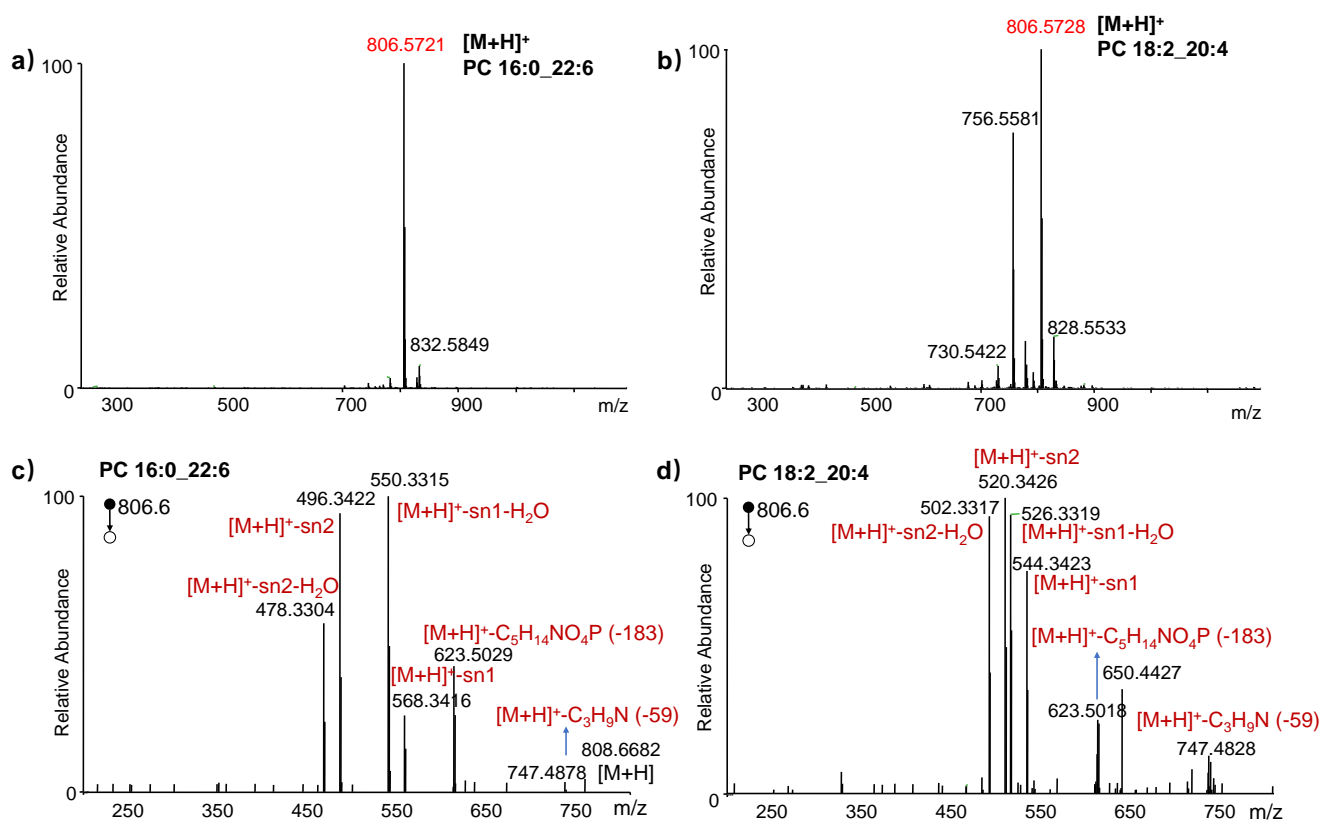

**Fig. S12.** Full mass and MS/MS spectra of PC 38:6 in the serum extract in positive ion mode. a, b) full mass spectrum of PC 38:6 at a) 9.33 min and b) 8.66 min; c, d) MS/MS spectrum of PC 38:6 at c) 9.33 min and d) 8.66 min. The “sn1” and “sn2” were used to discriminate the acyl fatty chains and don’t represent the actual sn-steric structure.

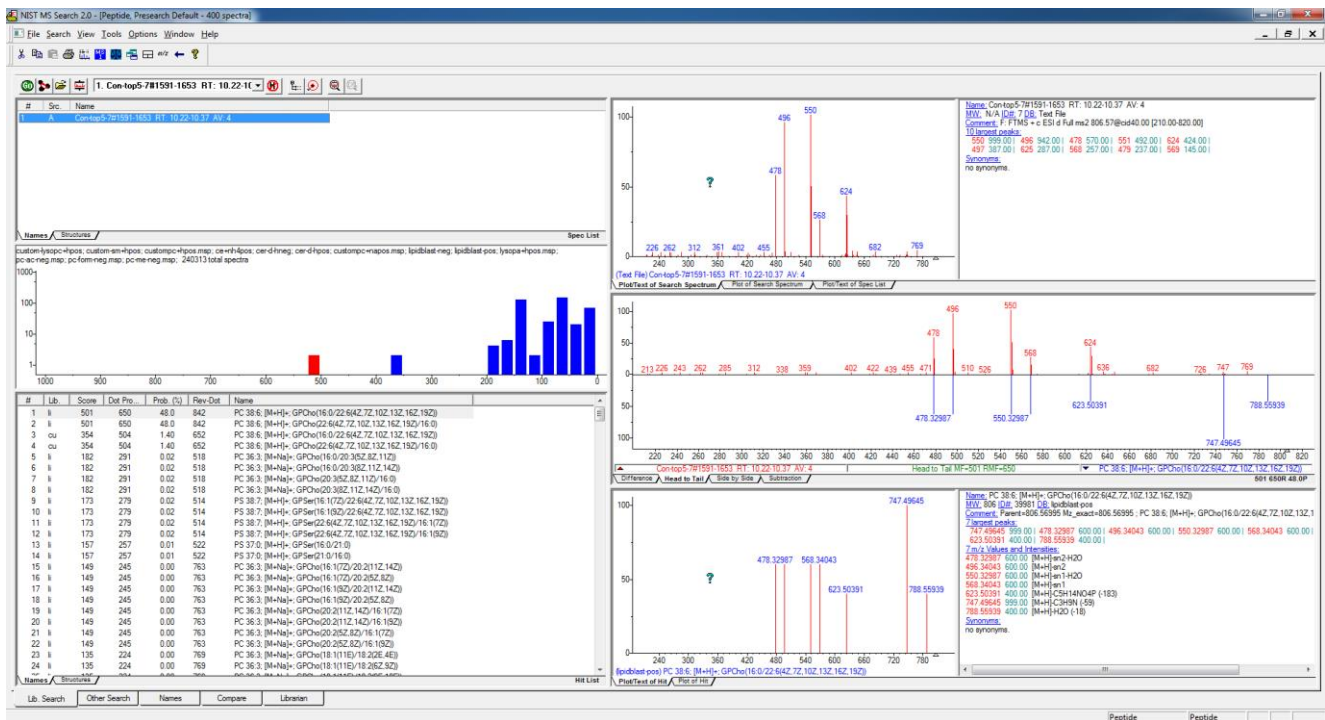

**Fig. S13.** Matching of the MS/MS spectrum of PC 38:6 in the serum extract at 9.33 min in the Lipid Blast database.

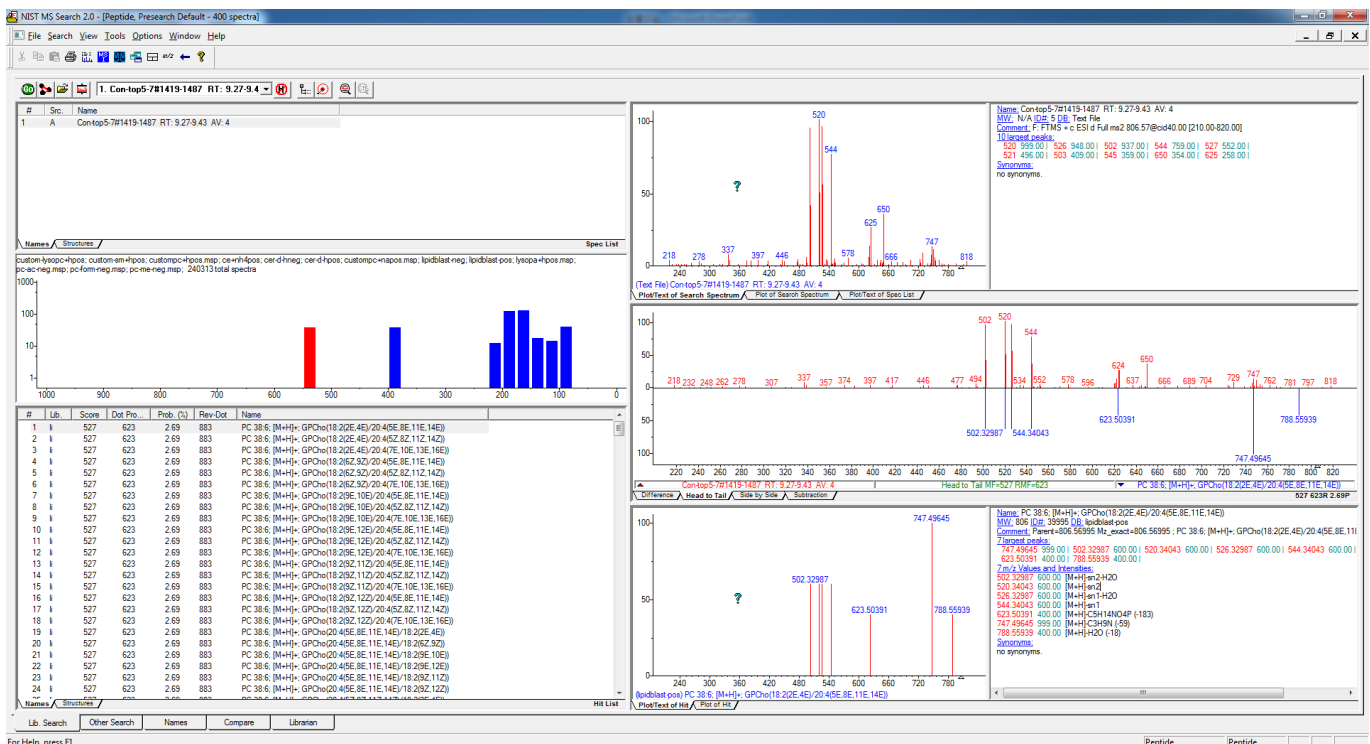

**Fig. S14.** Matching of the MS/MS spectrum of PC 38:6 in the serum extract at 8.66 min in the Lipid Blast database.

PC18:2 (9, 12)\_20: 4 (5, 8, 11, 14)

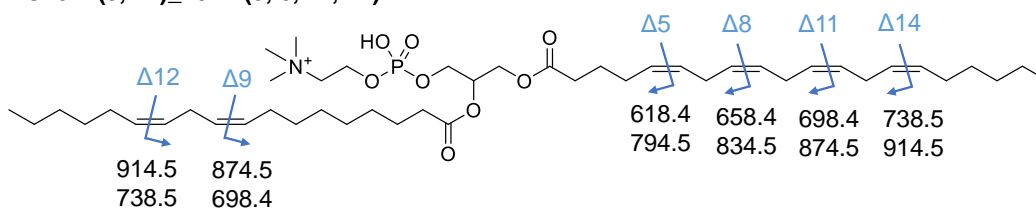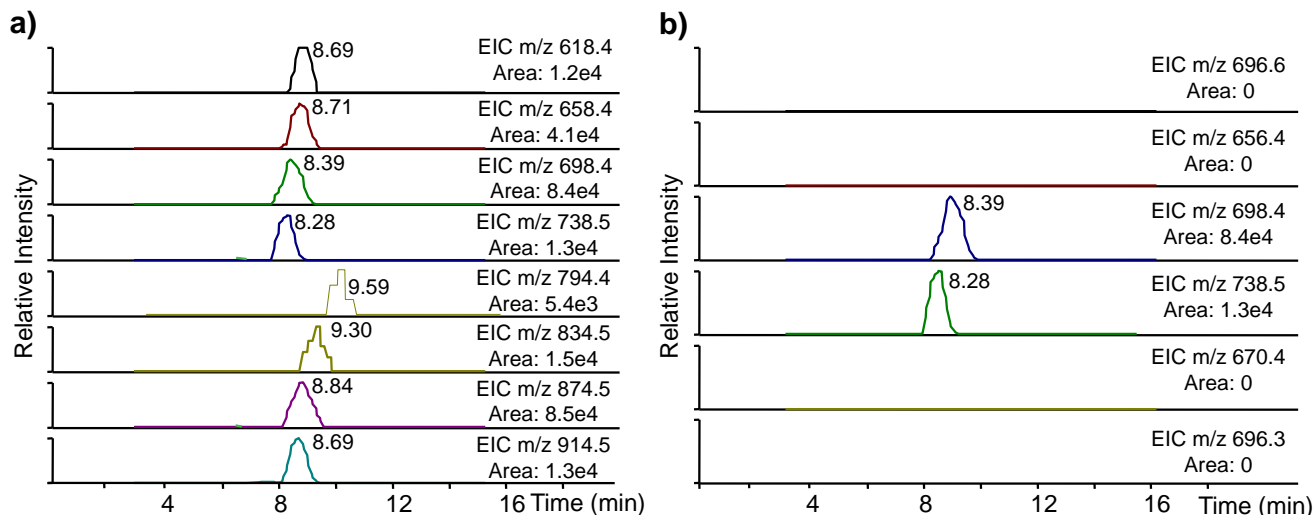

**Fig. S15.** EICs of the diagnostic ions for a) acyl chain 20:4 (5, 8, 11, 14) and b) acyl chain 18:2 in PC 18:2\_20:4. EICs at  $m/z$  696.6/656.4 correspond to the simulated diagnostic ions derived from the double bonds at  $\Delta 6$  and  $\Delta 9$  in the fatty acyl chain 18:2, EICs at  $m/z$  698.4/738.5 correspond to that of the double bonds at  $\Delta 9$  and  $\Delta 12$ , and EICs at  $m/z$  670.4/696.3 correspond to that of the double bonds at  $\Delta 9$  and  $\Delta 11$ . The chemical structure on the top show the positions of C=C bonds in PC 18:2\_20:4 and the  $m/z$  values of the possible diagnostic fragment ions of its VACA reaction products via CID.

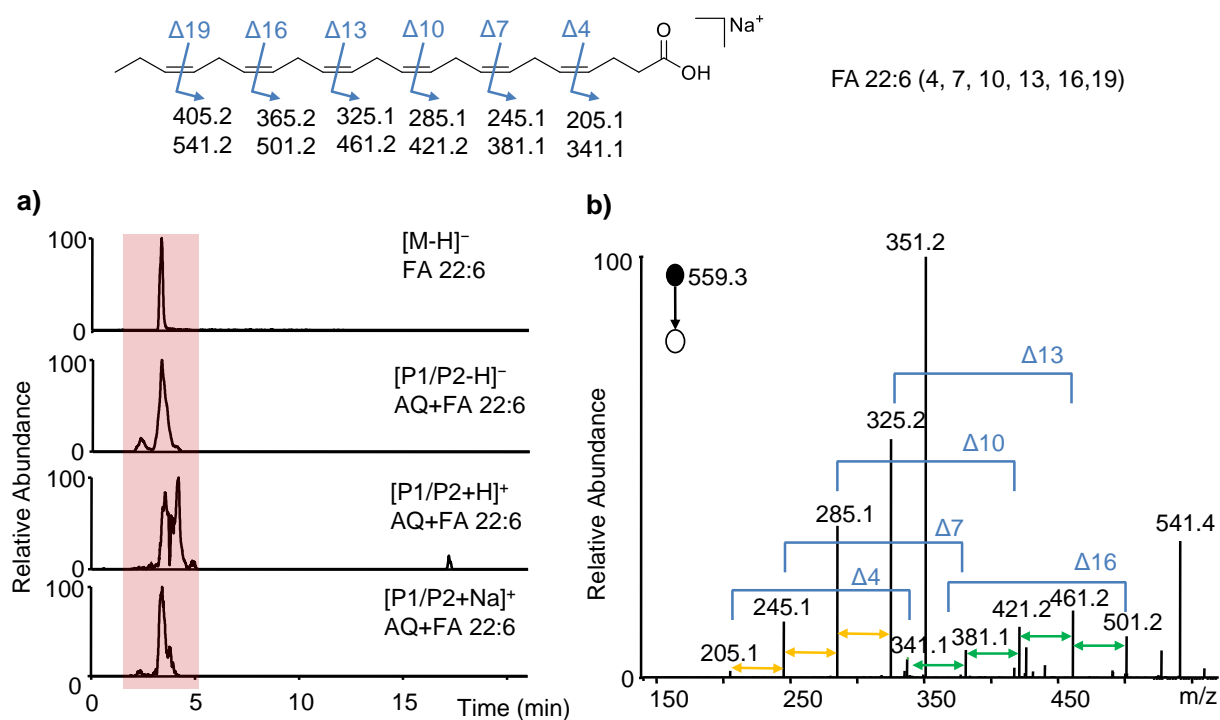

**Fig. S16.** Identification of the FA 22:6 in the serum extract. a) From top to the bottom: EICs of FA 22:6 at  $m/z$  327.2  $[M-H]^-$ , the VACA products of FA 22:6 in the negative ( $m/z$  535.3,  $[P1/P2-H]^-$ ) and positive ( $m/z$  537.3  $[P1/P2+H]^+$  and 559.3  $[P1/P2+Na]^+$ ) ion modes. b) MS/MS spectrum of VACA products  $[P1/P2+Na]^+$  at  $m/z$  559.3. The chemical structure on the top shows the positions of C=C bonds and the possible  $m/z$  values of the diagnostic fragment ions. The diagnostic ion pair for C=C at  $\Delta 19$  were not detected, and only five positions of C=C were inferred based on this MS/MS spectrum. Given the typical rule for the position of nonconjugated C=C bonds in fatty acids, we speculated that another position of C=C bond was located between C19 and C20. Hence, this FA was identified as FA 22:6 (4, 7, 10, 13, 16, 19).

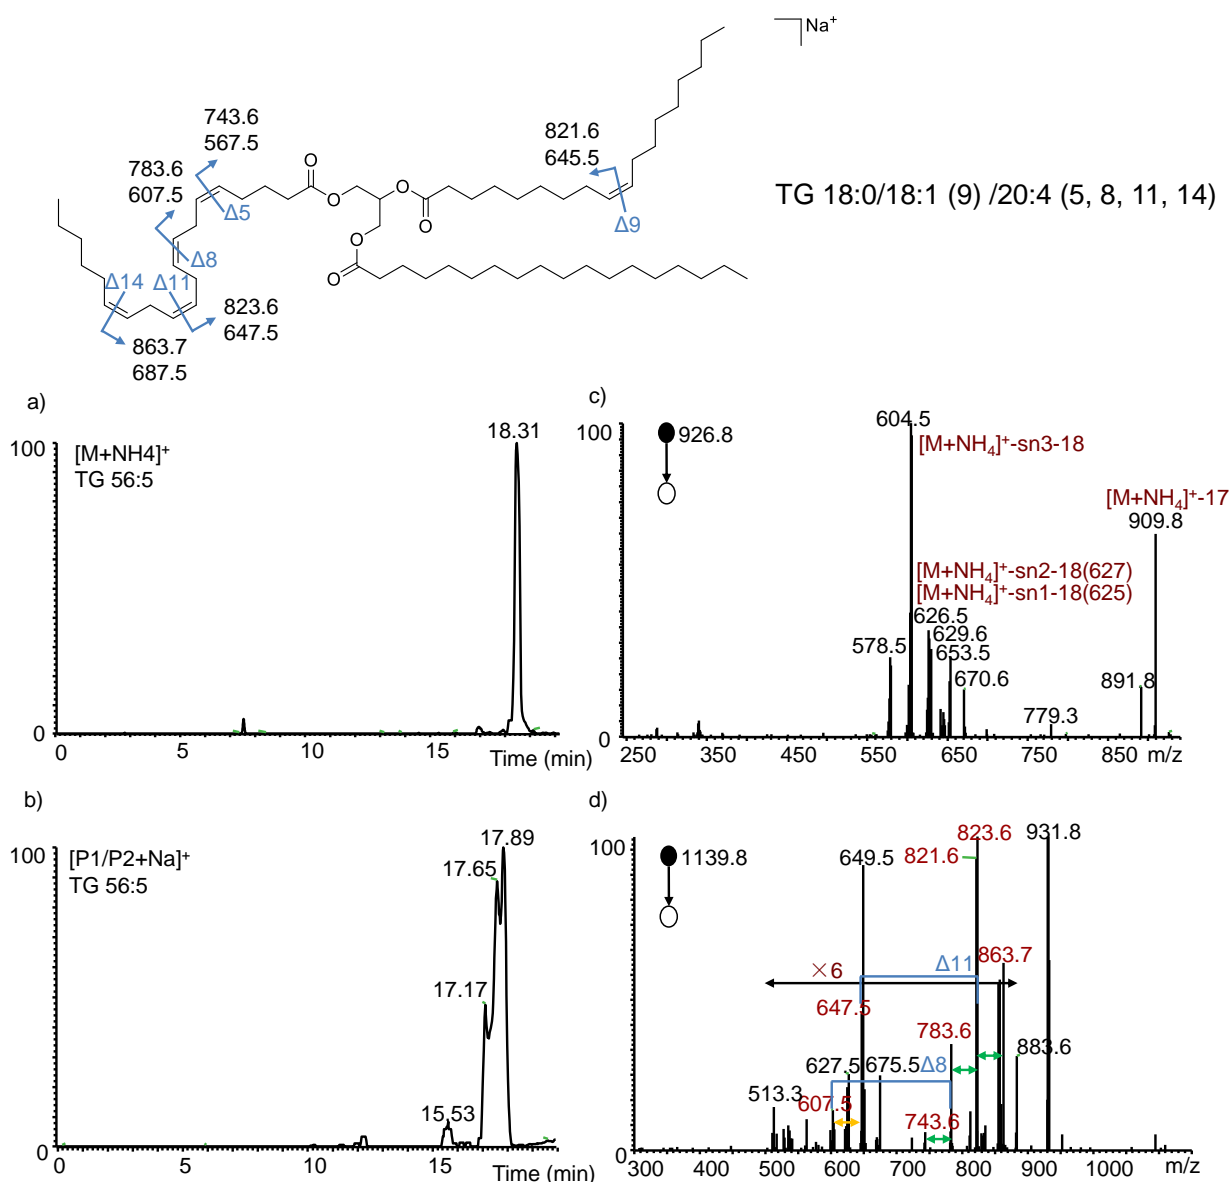

**Fig. S17.** Identification of the TG 56:5 in the serum extract. a) EICs of TG 56:5 at  $m/z$  926.8  $[M+NH_4]^+$ . b) the VACA products of TG 56:5 in the positive ( $m/z$  1139.8  $[P1/P2+Na]^+$ ) ion mode. c) MS/MS spectrum of TG 56:5 at  $m/z$  926.8  $[M+NH_4]^+$  at 18.31 min. d) average MS/MS spectra of VACA products  $[P1/P2+Na]^+$  at  $m/z$  1139.8 from 17.17~17.89 min. The chemical structure on the top shows the positions of C=C bonds and the possible  $m/z$  values of the diagnostic fragment ions for TG 18:0\_18:1 (9)\_20:4 (5, 8, 11, 14). Diagnostic ion pairs for C=C at  $\Delta 8$  and  $\Delta 11$  were detected for fatty acyl chain 20:4, while other C=C bond positions were detected with single diagnostic ions P1a. There also a diagnostic ion P1a at  $m/z$  821.6 for another fatty acyl chain. Based on the outcome of LipidBlast (see Fig. S14), the structure of TG 56:5 with the highest score was TG 18:0\_18:1\_20:4. Therefore, the detailed structure this TG compound should be 18:0\_18:1 (9)\_20:4 (5, 8, 11,14).

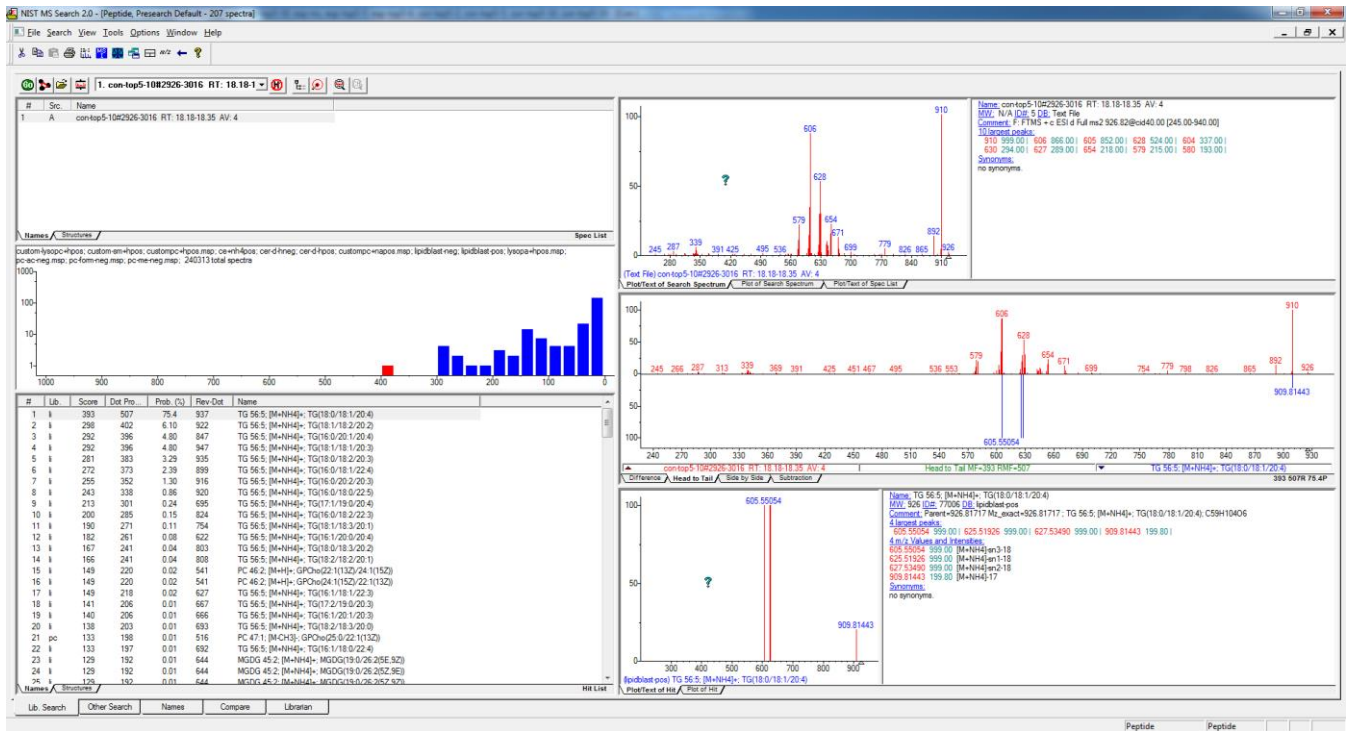

**Fig. S18.** Matching of the MS/MS spectrum of TG 56:5 in the serum extract at 18.31 min in the Lipid Blast database.

## Supplementary Tables

**Table S1.** Statistics of the lipid numbers identified in human serum.

| Lipids                          | FA | PC | PE | TG | SM | Cer | Total |
|---------------------------------|----|----|----|----|----|-----|-------|
| Unidentified unsaturated lipids | 0  | 9  | 16 | 41 | 25 | 0   | 96    |
| Identified unsaturated lipids   | 12 | 45 | 5  | 21 | 2  | 1   | 86    |
| Saturated lipids                | 3  | 15 | 3  | 10 | 4  | 1   | 36    |
| Total                           | 15 | 69 | 24 | 72 | 31 | 2   | 213   |

**Table S2.** Detailed structures of the lipids with the identified C=C bond positions.

| Class                                  | Structures with C=C positions                  |
|----------------------------------------|------------------------------------------------|
| Fatty acids (FA) 12 (12)               | FA 16:1 (9/11)                                 |
|                                        | FA 18:1 (9/11)                                 |
|                                        | FA 18:2 (9,12)                                 |
|                                        | FA 18:3 (9,12,15)                              |
|                                        | FA 20:1 (11/13)                                |
|                                        | FA 20:2 (11, 14)                               |
|                                        | FA 20:3 (8, 11, 14)                            |
|                                        | FA 20:4 (5, 8, 11, 14)                         |
|                                        | FA 22:1 (13)                                   |
|                                        | FA 22:4 (7, 10, 13, 16)                        |
|                                        | FA 22:5 (7, 10, 13, 16, 19)                    |
|                                        | FA 22:6 (4, 7, 10, 13, 16, 19)                 |
| Lysophosphatidylcholines (LPC) 15 (17) | LPC 16:1 (9)                                   |
|                                        | LPC 18:1 (9 vs. 11)                            |
|                                        | LPC 20:1 (11)                                  |
|                                        | LPC 18:2 (9, 12)                               |
|                                        | LPC 20:2 (8, 11)                               |
|                                        | LPC 18:3 (6, 9, 12)                            |
|                                        | LPC 20:3 (8, 11, 14)                           |
|                                        | LPC 20:4 (6, 9, 11, 14)                        |
|                                        | LPC 22:4 (7, 10, 13, 16)                       |
|                                        | LPC 20:5 (4, 7, 10, 13, 16)                    |
|                                        | LPC 22:5 (4, 7, 10, 13, 16)                    |
| LPC 22:6 (4, 7, 10, 13, 16, 19)        |                                                |
| Phosphocholines (PC) 30 (36)           | PC 16:0_18:1 (9 vs. 11)                        |
|                                        | PC 18:0_18:1 (9)                               |
|                                        | PC P-16:0_24:1 (15 vs.18)                      |
|                                        | PC 14:0_18:2 (9, 12)                           |
|                                        | PC 15:0_18:2 (9, 12)                           |
|                                        | PC 16:0_18:2 (9, 12)                           |
|                                        | PC P-16:0_18:2 (9, 12)                         |
|                                        | PC 17:0_18:2 (9, 12)                           |
|                                        | PC 18:0_18:2 (9, 12)                           |
|                                        | PC 18:0_20:2 (8, 11) / PC 20:0_18:2 (9, 12)    |
|                                        | PC 18:2_18:2 (9, 12)                           |
|                                        | PC P-16:0_20:2 (8, 11)                         |
|                                        | PC P-18:0_22:2 (13, 16) / PC 18:2 (9, 12)_22:0 |
|                                        | PC 18:0_18:3 (6, 9, 12)                        |
|                                        | PC 17:0_20:3 (8, 11, 14)                       |
|                                        | PC 18:0_20:3 (8, 11, 14)                       |
|                                        | PC 15:0_20:4 (5, 8, 11, 14)                    |
| PC 17:0_20:4 (5, 8, 11, 14)            |                                                |



|                                          |                                                                                                                                                                                                                                                                                                                                                                                                                                                                                                                                                                                                                                                                                             |
|------------------------------------------|---------------------------------------------------------------------------------------------------------------------------------------------------------------------------------------------------------------------------------------------------------------------------------------------------------------------------------------------------------------------------------------------------------------------------------------------------------------------------------------------------------------------------------------------------------------------------------------------------------------------------------------------------------------------------------------------|
|                                          | PC 17:0_22:4 (7, 10, 13, 16)<br>PC 18:0_18:4 (3, 6, 9, 12)<br>PC 18:1_20:4 (5, 8, 11, 14)<br>PC 18:2_20:4 (8, 11, 14, 17)<br>PC 18:0_22:4 (10, 13, 16, 19)<br>PC P-20:0_24:4 (5, 8, 11, 14)<br>PC 18:0_22:5 (4, 7, 10, 13, 16)<br>PC P-20:0_22:5 (4, 7, 10, 13, 16)<br>PC 16:0_22:6 (4, 7, 10, 13, 16, 19)<br>PC 18:0_22:6 (4, 7, 10, 13, 16, 19)                                                                                                                                                                                                                                                                                                                                           |
| Lysophosphatidylethanolamine (LPE) 1 (4) | LPE 18:1 (9) (standard)                                                                                                                                                                                                                                                                                                                                                                                                                                                                                                                                                                                                                                                                     |
| Phosphoethanolamines (PE) 4 (16)         | PE 16:0_18:2 (10,13)<br>PE 18:2_20:2 (11, 14)<br>PE 18:1 (9)_18:1 (9) (standard)<br>PE P-18:2_20:2 (11, 14)                                                                                                                                                                                                                                                                                                                                                                                                                                                                                                                                                                                 |
| Cer 1(1)                                 | Cer d18:1/16:0 (standard)                                                                                                                                                                                                                                                                                                                                                                                                                                                                                                                                                                                                                                                                   |
| Sphingomyelins (SM) 2 (27)               | SM d15:1_26:1 (17)<br>SM d17:1_24:1 (15)                                                                                                                                                                                                                                                                                                                                                                                                                                                                                                                                                                                                                                                    |
| Triradylglycerolipids (TG) 21 (62)       | TG 12:0_18:1 (15)_16:1 (13)<br>TG 14:1_16:1 (10)_18:1 (12)<br>TG 14:0_16:1 (10)_18:1 (11)<br>TG 16:0_16:1 (10)_17:0<br>TG 16:0_16:1 (10)_18:1 (12)<br>TG 16:0_16:0_18:1 (11)<br>TG 16:0_17:1 (8)_18:2 (6, 9)<br>TG 16:0_17:1 (8)_18:1 (9)<br>TG 16:0_18:2 (9, 12)_18:2 (9, 12)<br>TG 16:0_18:1 (9)_18:2 (9, 12)<br>TG 16:0_18:1 (9)_18:1 (9) /16:0_18:1 (11)_18:1 (11)<br>TG 17:0_18:1 (9)_18:2 (9, 12)<br>TG 17:0_18:1 (9)_18:1 (9)<br>TG 18:2 (9, 12)_18:2 (9, 12)_18:2 (9, 12)<br>TG 18:1 (9)_18:1 (9)_18:2 (9, 12)<br>TG 18:1 (9)_18:1 (9)_18:1 (9)<br>TG 18:1 (9)_18:2 (9, 12)_20:4(5, 8, 11, 14)<br>TG 18:1 (9)_18:2 (9, 12)_20:3 (8, 11, 14)<br>TG 18:0_18:1 (17)_20:4(5, 8, 11, 14) |

Note: "P-" represent the species of (1Z)-alkenyl ether (neutral Plasmalogen); the values after each subclass names are the number of identified unsaturated lipid species with specific C=C location, while the values in parenthesis are the number of all identified unsaturated lipids without analysis of C=C location isomers.

**Table S3.** PC and LPC identified from human serum extract.

| No. | Identification           | RT (min) | Formula                                           | Observed m/z | Calculated m/z | Error (ppm) | Adduct             | Match details                                                                                                                                                                                         | Formula of neutral loss molecules for C=C analysis                                                                                  |
|-----|--------------------------|----------|---------------------------------------------------|--------------|----------------|-------------|--------------------|-------------------------------------------------------------------------------------------------------------------------------------------------------------------------------------------------------|-------------------------------------------------------------------------------------------------------------------------------------|
| 1   | LPC 14:0                 | 1.28     | C <sub>22</sub> H <sub>46</sub> NO <sub>7</sub> P | 468.3109     | 468.3090       | 4.1         | [M+H] <sup>+</sup> | 184.07387 300.00 C <sub>5</sub> H <sub>15</sub> NO <sub>4</sub> P m/z=184<br>240.10020 10.00 [M+H]-sn1-H <sub>2</sub> O<br>258.11076 10.00 [M+H]-sn1<br>450.29844 999.00 [M+H]-H <sub>2</sub> O (-18) | -                                                                                                                                   |
| 2   | LPC 15:0                 | 1.69     | C <sub>23</sub> H <sub>48</sub> NO <sub>7</sub> P | 482.3260     | 482.3246       | 2.9         | [M+H] <sup>+</sup> | 184.07387 300.00 C <sub>5</sub> H <sub>15</sub> NO <sub>4</sub> P m/z=184<br>240.10021 10.00 [M+H]-sn1-H <sub>2</sub> O<br>258.11077 10.00 [M+H]-sn1<br>464.31409 999.00 [M+H]-H <sub>2</sub> O (-18) | -                                                                                                                                   |
| 3   | LPC 16:1 (9)             | 1.44     | C <sub>24</sub> H <sub>48</sub> NO <sub>7</sub> P | 494.3262     | 494.3246       | 3.2         | [M+H] <sup>+</sup> | 184.07387 300.00 C <sub>5</sub> H <sub>15</sub> NO <sub>4</sub> P m/z=184<br>240.10021 10.00 [M+H]-sn1-H <sub>2</sub> O<br>258.11077 10.00 [M+H]-sn1<br>476.31409 999.00 [M+H]-H <sub>2</sub> O (-18) | C <sub>7</sub> H <sub>14</sub>                                                                                                      |
| 4   | LPC 16:0                 | 2.16     | C <sub>24</sub> H <sub>50</sub> NO <sub>7</sub> P | 496.3402     | 496.3403       | -0.2        | [M+H] <sup>+</sup> | 184.07387 300.00 C <sub>5</sub> H <sub>15</sub> NO <sub>4</sub> P m/z=184<br>240.10023 10.00 [M+H]-sn1-H <sub>2</sub> O<br>258.11079 10.00 [M+H]-sn1<br>478.32975 999.00 [M+H]-H <sub>2</sub> O (-18) | -                                                                                                                                   |
| 5   | LPC 17:1                 | 1.88     | C <sub>25</sub> H <sub>50</sub> NO <sub>7</sub> P | 508.3416     | 508.3403       | 2.6         | [M+H] <sup>+</sup> | 184.07387 300.00 C <sub>5</sub> H <sub>15</sub> NO <sub>4</sub> P m/z=184<br>240.10023 10.00 [M+H]-sn1-H <sub>2</sub> O<br>258.11079 10.00 [M+H]-sn1<br>490.32975 999.00 [M+H]-H <sub>2</sub> O (-18) | /                                                                                                                                   |
| 6   | LPC 17:0                 | 2.84     | C <sub>25</sub> H <sub>52</sub> NO <sub>7</sub> P | 510.3579     | 510.3560       | 3.7         | [M+H] <sup>+</sup> | 184.07387 300.00 C <sub>5</sub> H <sub>15</sub> NO <sub>4</sub> P m/z=184<br>240.10024 10.00 [M+H]-sn1-H <sub>2</sub> O<br>258.11080 10.00 [M+H]-sn1<br>492.34540 999.00 [M+H]-H <sub>2</sub> O (-18) | -                                                                                                                                   |
| 7   | LPC 18:3 (6, 9, 12)      | 1.98     | C <sub>26</sub> H <sub>48</sub> NO <sub>7</sub> P | 518.3264     | 518.3246       | 3.5         | [M+H] <sup>+</sup> | 184.07387 300.00 C <sub>5</sub> H <sub>15</sub> NO <sub>4</sub> P m/z=184<br>240.10021 10.00 [M+H]-sn1-H <sub>2</sub> O<br>258.11077 10.00 [M+H]-sn1<br>500.31409 999.00 [M+H]-H <sub>2</sub> O (-18) | C <sub>6</sub> H <sub>12</sub> , C <sub>9</sub> H <sub>16</sub> , C <sub>12</sub> H <sub>20</sub>                                   |
| 8   | LPC 18:2 (9, 12)         | 1.59     | C <sub>26</sub> H <sub>50</sub> NO <sub>7</sub> P | 520.3423     | 520.3403       | 3.8         | [M+H] <sup>+</sup> | 184.07387 300.00 C <sub>5</sub> H <sub>15</sub> NO <sub>4</sub> P m/z=184<br>240.10026 10.00 [M+H]-sn1-H <sub>2</sub> O<br>258.11082 10.00 [M+H]-sn1<br>502.32978 999.00 [M+H]-H <sub>2</sub> O (-18) | C <sub>6</sub> H <sub>12</sub> , C <sub>9</sub> H <sub>16</sub>                                                                     |
| 9   | LPC 18:1 (9)_18:1 (11)   | 2.38     | C <sub>26</sub> H <sub>52</sub> NO <sub>7</sub> P | 522.3572     | 522.3560       | 2.3         | [M+H] <sup>+</sup> | 184.07387 300.00 C <sub>5</sub> H <sub>15</sub> NO <sub>4</sub> P m/z=184<br>240.10024 10.00 [M+H]-sn1-H <sub>2</sub> O<br>258.11080 10.00 [M+H]-sn1<br>504.34540 999.00 [M+H]-H <sub>2</sub> O (-18) | C <sub>9</sub> H <sub>18</sub> , C <sub>11</sub> H <sub>22</sub>                                                                    |
| 10  | LPC P-18:0               | 2.86     | C <sub>26</sub> H <sub>54</sub> NO <sub>6</sub> P | 508.3790     | 508.3767       | 4.5         | [M+H] <sup>+</sup> | 184.07387 300.00 C <sub>5</sub> H <sub>15</sub> NO <sub>4</sub> P m/z=184<br>224.10533 10.00 [M+H]-sn1-H <sub>2</sub> O<br>242.11589 10.00 [M+H]-sn1<br>490.36613 999.00 [M+H]-H <sub>2</sub> O (-18) | -                                                                                                                                   |
| 11  | LPC 18:0                 | 3.65     | C <sub>26</sub> H <sub>54</sub> NO <sub>7</sub> P | 524.3734     | 524.3716       | 3.4         | [M+H] <sup>+</sup> | 184.07387 300.00 C <sub>5</sub> H <sub>15</sub> NO <sub>4</sub> P m/z=184<br>240.10023 10.00 [M+H]-sn1-H <sub>2</sub> O<br>258.11079 10.00 [M+H]-sn1<br>506.36103 999.00 [M+H]-H <sub>2</sub> O (-18) | -                                                                                                                                   |
| 12  | LPC 20:5 (5, 8,11,14,17) | 1.16     | C <sub>28</sub> H <sub>48</sub> NO <sub>7</sub> P | 542.3264     | 542.3246       | 3.3         | [M+H] <sup>+</sup> | 184.07387 300.00 C <sub>5</sub> H <sub>15</sub> NO <sub>4</sub> P m/z=184<br>240.10021 10.00 [M+H]-sn1-H <sub>2</sub> O<br>258.11077 10.00 [M+H]-sn1<br>524.31409 999.00 [M+H]-H <sub>2</sub> O (-18) | C <sub>3</sub> H <sub>6</sub> , C <sub>6</sub> H <sub>10</sub> , C <sub>9</sub> H <sub>14</sub> , C <sub>12</sub> H <sub>18</sub>   |
| 13  | LPC 20:4 (5, 8,11,14)    | 1.57     | C <sub>28</sub> H <sub>50</sub> NO <sub>7</sub> P | 544.3404     | 544.3403       | 0.2         | [M+H] <sup>+</sup> | 184.07387 300.00 C <sub>5</sub> H <sub>15</sub> NO <sub>4</sub> P m/z=184<br>240.10026 10.00 [M+H]-sn1-H <sub>2</sub> O<br>258.11082 10.00 [M+H]-sn1<br>526.32978 999.00 [M+H]-H <sub>2</sub> O (-18) | C <sub>6</sub> H <sub>12</sub> , C <sub>9</sub> H <sub>16</sub> , C <sub>12</sub> H <sub>20</sub> , C <sub>15</sub> H <sub>24</sub> |

|    |                                 |       |                                                   |          |          |      |                    |                                                                                                                                                                                                                                                                                                                                                        |                                                                                                                                                                                                          |
|----|---------------------------------|-------|---------------------------------------------------|----------|----------|------|--------------------|--------------------------------------------------------------------------------------------------------------------------------------------------------------------------------------------------------------------------------------------------------------------------------------------------------------------------------------------------------|----------------------------------------------------------------------------------------------------------------------------------------------------------------------------------------------------------|
| 14 | LPC 20:3 (8,11,14)              | 2.01  | C <sub>28</sub> H <sub>52</sub> NO <sub>7</sub> P | 546.3575 | 546.3560 | 2.7  | [M+H] <sup>+</sup> | 184.07387 300.00 C <sub>5</sub> H <sub>15</sub> NO <sub>4</sub> P m/z=184<br>240.10024 10.00 [M+H] <sup>-</sup> -H <sub>2</sub> O<br>258.11080 10.00 [M+H] <sup>-</sup> -sn1<br>528.34540 999.00 [M+H] <sup>-</sup> -H <sub>2</sub> O (-18)                                                                                                            | C <sub>6</sub> H <sub>12</sub> , C <sub>9</sub> H <sub>16</sub> , C <sub>12</sub> H <sub>20</sub>                                                                                                        |
| 15 | LPC 20:2 (8, 11)                | 2.80  | C <sub>28</sub> H <sub>54</sub> NO <sub>7</sub> P | 548.3730 | 548.3716 | 2.6  | [M+H] <sup>+</sup> | 184.07387 300.00 C <sub>5</sub> H <sub>15</sub> NO <sub>4</sub> P m/z=184<br>240.10023 10.00 [M+H] <sup>-</sup> -H <sub>2</sub> O<br>258.11079 10.00 [M+H] <sup>-</sup> -sn1<br>530.36103 999.00 [M+H] <sup>-</sup> -H <sub>2</sub> O (-18)                                                                                                            | C <sub>9</sub> H <sub>18</sub> , C <sub>12</sub> H <sub>22</sub>                                                                                                                                         |
| 16 | LPC 20:1 (11)                   | 3.81  | C <sub>28</sub> H <sub>56</sub> NO <sub>7</sub> P | 550.3880 | 550.3873 | 1.3  | [M+H] <sup>+</sup> | 184.07387 300.00 C <sub>5</sub> H <sub>15</sub> NO <sub>4</sub> P m/z=184<br>240.10028 10.00 [M+H] <sup>-</sup> -H <sub>2</sub> O<br>258.11084 10.00 [M+H] <sup>-</sup> -sn1<br>532.37672 999.00 [M+H] <sup>-</sup> -H <sub>2</sub> O (-18)                                                                                                            | C <sub>9</sub> H <sub>18</sub>                                                                                                                                                                           |
| 17 | LPC 20:0                        | 5.36  | C <sub>28</sub> H <sub>58</sub> NO <sub>7</sub> P | 552.4038 | 552.4029 | 1.6  | [M+H] <sup>+</sup> | 184.07387 300.00 C <sub>5</sub> H <sub>15</sub> NO <sub>4</sub> P m/z=184<br>240.10026 10.00 [M+H] <sup>-</sup> -H <sub>2</sub> O<br>258.11082 10.00 [M+H] <sup>-</sup> -sn1<br>534.39234 999.00 [M+H] <sup>-</sup> -H <sub>2</sub> O (-18)                                                                                                            | -                                                                                                                                                                                                        |
| 18 | LPC 22:6 (4, 7, 10, 13, 16, 19) | 1.47  | C <sub>30</sub> H <sub>50</sub> NO <sub>7</sub> P | 568.3408 | 568.3403 | 0.9  | [M+H] <sup>+</sup> | 184.07387 300.00 C <sub>5</sub> H <sub>15</sub> NO <sub>4</sub> P m/z=184<br>240.10026 10.00 [M+H] <sup>-</sup> -H <sub>2</sub> O<br>258.11082 10.00 [M+H] <sup>-</sup> -sn1<br>550.32978 999.00 [M+H] <sup>-</sup> -H <sub>2</sub> O (-18)                                                                                                            | C <sub>3</sub> H <sub>6</sub> , C <sub>6</sub> H <sub>10</sub> , C <sub>9</sub> H <sub>14</sub> , C <sub>12</sub> H <sub>18</sub> ,<br>C <sub>15</sub> H <sub>22</sub> , C <sub>18</sub> H <sub>26</sub> |
| 19 | LPC 22:5 (7, 10, 13, 16, 19)    | 1.74  | C <sub>30</sub> H <sub>52</sub> NO <sub>7</sub> P | 570.3557 | 570.3560 | -0.5 | [M+H] <sup>+</sup> | 184.07387 300.00 C <sub>5</sub> H <sub>15</sub> NO <sub>4</sub> P m/z=184<br>240.10024 10.00 [M+H] <sup>-</sup> -H <sub>2</sub> O<br>258.11080 10.00 [M+H] <sup>-</sup> -sn1<br>552.34540 999.00 [M+H] <sup>-</sup> -H <sub>2</sub> O (-18)                                                                                                            | C <sub>3</sub> H <sub>6</sub> , C <sub>6</sub> H <sub>10</sub> , C <sub>9</sub> H <sub>14</sub> , C <sub>12</sub> H <sub>18</sub> ,<br>C <sub>15</sub> H <sub>22</sub>                                   |
| 20 | LPC 22:5 (4, 7, 10, 13, 16)     | 2.07  | C <sub>30</sub> H <sub>52</sub> NO <sub>7</sub> P | 570.3576 | 570.3560 | 2.8  | [M+H] <sup>+</sup> | 184.07387 300.00 C <sub>5</sub> H <sub>15</sub> NO <sub>4</sub> P m/z=184<br>240.10024 10.00 [M+H] <sup>-</sup> -H <sub>2</sub> O<br>258.11080 10.00 [M+H] <sup>-</sup> -sn1<br>552.34540 999.00 [M+H] <sup>-</sup> -H <sub>2</sub> O (-18)                                                                                                            | C <sub>6</sub> H <sub>12</sub> , C <sub>9</sub> H <sub>16</sub> , C <sub>12</sub> H <sub>20</sub> , C <sub>15</sub> H <sub>24</sub>                                                                      |
| 21 | LPC 22:4 (7, 10, 13, 16)        | 2.50  | C <sub>30</sub> H <sub>54</sub> NO <sub>7</sub> P | 572.3718 | 572.3716 | 0.4  | [M+H] <sup>+</sup> | 184.07387 300.00 C <sub>5</sub> H <sub>15</sub> NO <sub>4</sub> P m/z=184<br>240.10023 10.00 [M+H] <sup>-</sup> -H <sub>2</sub> O<br>258.11079 10.00 [M+H] <sup>-</sup> -sn1<br>554.36103 999.00 [M+H] <sup>-</sup> -H <sub>2</sub> O (-18)                                                                                                            | C <sub>6</sub> H <sub>12</sub> , C <sub>9</sub> H <sub>16</sub> , C <sub>12</sub> H <sub>20</sub> , C <sub>15</sub> H <sub>24</sub>                                                                      |
| 22 | LPC 22:1                        | 5.41  | C <sub>30</sub> H <sub>60</sub> NO <sub>7</sub> P | 578.4198 | 578.4186 | 2.1  | [M+H] <sup>+</sup> | 184.07387 300.00 C <sub>5</sub> H <sub>15</sub> NO <sub>4</sub> P m/z=184<br>240.10031 10.00 [M+H] <sup>-</sup> -H <sub>2</sub> O<br>258.11087 10.00 [M+H] <sup>-</sup> -sn1<br>560.40803 999.00 [M+H] <sup>-</sup> -H <sub>2</sub> O (-18)                                                                                                            | /                                                                                                                                                                                                        |
| 23 | LPC 22:0                        | 6.59  | C <sub>30</sub> H <sub>62</sub> NO <sub>7</sub> P | 580.4360 | 580.4342 | 3.1  | [M+H] <sup>+</sup> | 184.07387 300.00 C <sub>5</sub> H <sub>15</sub> NO <sub>4</sub> P m/z=184<br>240.10029 10.00 [M+H] <sup>-</sup> -H <sub>2</sub> O<br>258.11085 10.00 [M+H] <sup>-</sup> -sn1<br>562.42365 999.00 [M+H] <sup>-</sup> -H <sub>2</sub> O (-18)                                                                                                            | -                                                                                                                                                                                                        |
| 24 | LPC 24:0                        | 7.77  | C <sub>32</sub> H <sub>66</sub> NO <sub>7</sub> P | 608.4677 | 608.4655 | 3.6  | [M+H] <sup>+</sup> | 184.07387 300.00 C <sub>5</sub> H <sub>15</sub> NO <sub>4</sub> P m/z=184<br>240.10032 10.00 [M+H] <sup>-</sup> -H <sub>2</sub> O<br>258.11088 10.00 [M+H] <sup>-</sup> -sn1<br>590.45496 999.00 [M+H] <sup>-</sup> -H <sub>2</sub> O (-18)                                                                                                            | -                                                                                                                                                                                                        |
| 25 | LPC 26:1                        | 8.2   | C <sub>34</sub> H <sub>68</sub> NO <sub>7</sub> P | 634.4830 | 634.4812 | 2.9  | [M+H] <sup>+</sup> | 184.07387 300.00 C <sub>5</sub> H <sub>15</sub> NO <sub>4</sub> P m/z=184<br>240.10031 10.00 [M+H] <sup>-</sup> -H <sub>2</sub> O<br>258.11087 10.00 [M+H] <sup>-</sup> -sn1<br>616.47059 999.00 [M+H] <sup>-</sup> -H <sub>2</sub> O (-18)                                                                                                            | /                                                                                                                                                                                                        |
| 26 | LPC 26:0                        | 9.21  | C <sub>34</sub> H <sub>70</sub> NO <sub>7</sub> P | 636.4978 | 636.4968 | 1.6  | [M+H] <sup>+</sup> | 184.07387 300.00 C <sub>5</sub> H <sub>15</sub> NO <sub>4</sub> P m/z=184<br>240.10035 10.00 [M+H] <sup>-</sup> -H <sub>2</sub> O<br>258.11091 10.00 [M+H] <sup>-</sup> -sn1<br>618.48627 999.00 [M+H] <sup>-</sup> -H <sub>2</sub> O (-18)                                                                                                            | -                                                                                                                                                                                                        |
| 27 | PC P-16:0_14:0                  | 10.31 | C <sub>38</sub> H <sub>76</sub> NO <sub>7</sub> P | 690.5460 | 690.5438 | 3.2  | [M+H] <sup>+</sup> | 391.22511 100.00 [M+H] <sup>-</sup> -sn1-C <sub>3</sub> H <sub>9</sub> N (-59)<br>450.29861 999.00 [M+H] <sup>-</sup> -sn1 (alkenyl ether loss)<br>462.33497 10.00 [M+H] <sup>-</sup> -sn2-H <sub>2</sub> O<br>480.34553 200.00 [M+H] <sup>-</sup> -sn2<br>507.47773 10.00 [M+H] <sup>-</sup> -C <sub>5</sub> H <sub>14</sub> NO <sub>4</sub> P (-183) | -                                                                                                                                                                                                        |
| 28 | PC 15:0_16:0                    | 10.40 | C <sub>39</sub> H <sub>78</sub> NO <sub>8</sub> P | 720.5570 | 720.5543 | 3.8  | [M+H] <sup>+</sup> | 464.31425 600.00 [M+H] <sup>-</sup> -sn2-H <sub>2</sub> O<br>478.32989 600.00 [M+H] <sup>-</sup> -sn1-H <sub>2</sub> O<br>482.32481 600.00 [M+H] <sup>-</sup> -sn2<br>496.34045 600.00 [M+H] <sup>-</sup> -sn1                                                                                                                                         | -                                                                                                                                                                                                        |

|    |                                      |       |                                                   |          |          |     |                    |  |                                                                                                                                                                                                                                                   |                                                                                                                                     |
|----|--------------------------------------|-------|---------------------------------------------------|----------|----------|-----|--------------------|--|---------------------------------------------------------------------------------------------------------------------------------------------------------------------------------------------------------------------------------------------------|-------------------------------------------------------------------------------------------------------------------------------------|
|    |                                      |       |                                                   |          |          |     |                    |  | 537.48829 400.00 [M+H]-C5H14NO4P (-183)<br>661.48083 999.00 [M+H]-C3H9N (-59)<br>702.54377 400.00 [M+H]-H2O (-18)                                                                                                                                 |                                                                                                                                     |
| 29 | PC 14:0_18:2 (9, 12)                 | 9.15  | C <sub>40</sub> H <sub>76</sub> NO <sub>8</sub> P | 730.5418 | 730.5387 | 4.2 | [M+H] <sup>+</sup> |  | 450.29862 600.00 [M+H]-sn2-H2O<br>468.30918 600.00 [M+H]-sn2<br>502.32990 600.00 [M+H]-sn1-H2O<br>520.34046 600.00 [M+H]-sn1<br>547.47266 400.00 [M+H]-C5H14NO4P (-183)<br>671.46520 999.00 [M+H]-C3H9N (-59)<br>712.52814 400.00 [M+H]-H2O (-18) | C <sub>6</sub> H <sub>12</sub> , C <sub>9</sub> H <sub>16</sub>                                                                     |
| 30 | PC P-16:0_16:0                       | 11.83 | C <sub>40</sub> H <sub>80</sub> NO <sub>7</sub> P | 718.5778 | 718.5751 | 3.8 | [M+H] <sup>+</sup> |  | 419.25642 100.00 [M+H]-sn1-C3H9N (-59)<br>462.33500 10.00 [M+H]-sn2-H2O<br>478.32992 999.00 [M+H]-sn1 (alkenyl ether loss)<br>480.34556 200.00 [M+H]-sn2<br>535.50904 10.00 [M+H]-C5H14NO4P (-183)                                                | -                                                                                                                                   |
| 31 | PC 16:0_16:0                         | 11.11 | C <sub>40</sub> H <sub>80</sub> NO <sub>8</sub> P | 734.5738 | 734.5694 | 6.0 | [M+H] <sup>+</sup> |  | 478.32987 600.00 [M+H]-sn1-H2O    [M+H]-sn2-H2O<br>496.34043 600.00 [M+H]-sn1    [M+H]-sn2<br>551.50391 400.00 [M+H]-C5H14NO4P (-183)<br>675.49645 999.00 [M+H]-C3H9N (-59)<br>716.55939 400.00 [M+H]-H2O (-18)                                   | -                                                                                                                                   |
| 32 | PC 15:0_18:2 (9, 12)                 | 10.30 | C <sub>41</sub> H <sub>78</sub> NO <sub>8</sub> P | 744.5563 | 744.5538 | 3.4 | [M+H] <sup>+</sup> |  | 464.31425 600.00 [M+H]-sn2-H2O<br>482.32481 600.00 [M+H]-sn2<br>502.32989 600.00 [M+H]-sn1-H2O<br>520.34045 600.00 [M+H]-sn1<br>561.48829 400.00 [M+H]-C5H14NO4P (-183)<br>685.48083 999.00 [M+H]-C3H9N (-59)<br>726.54377 400.00 [M+H]-H2O (-18) | C <sub>6</sub> H <sub>12</sub> , C <sub>9</sub> H <sub>16</sub>                                                                     |
| 33 | PC 16:0_18:2 (9, 12)                 | 10.84 | C <sub>42</sub> H <sub>80</sub> NO <sub>8</sub> P | 758.5721 | 758.5700 | 2.8 | [M+H] <sup>+</sup> |  | 478.32987 600.00 [M+H]-sn2-H2O<br>496.34043 600.00 [M+H]-sn2<br>502.32987 600.00 [M+H]-sn1-H2O<br>520.34043 600.00 [M+H]-sn1<br>575.50391 400.00 [M+H]-C5H14NO4P (-183)<br>699.49645 999.00 [M+H]-C3H9N (-59)<br>740.55939 400.00 [M+H]-H2O (-18) | C <sub>6</sub> H <sub>12</sub> , C <sub>9</sub> H <sub>16</sub>                                                                     |
| 34 | PC P-16:0_18:2 (9, 12)               | 10.69 | C <sub>42</sub> H <sub>80</sub> NO <sub>7</sub> P | 742.5781 | 742.5745 | 4.8 | [M+H] <sup>+</sup> |  | 263.23734 1.00 sn2-O<br>265.25298 1.00 sn1-O<br>460.28298 1.00 [M+H]-sn1-H2O<br>462.29862 1.00 [M+H]-sn2-H2O<br>478.29354 1.00 [M+H]-sn1<br>480.30918 1.00 [M+H]-sn2<br>601.51961 999.00 [M+H]-C2H8NO4P (-141)<br>724.52814 1.00 [M+H]-H2O (-18)  | C <sub>6</sub> H <sub>12</sub> , C <sub>9</sub> H <sub>16</sub>                                                                     |
| 35 | PC 16:0_18:1 (11) / PC 16:0_18:1 (9) | 12.00 | C <sub>42</sub> H <sub>82</sub> NO <sub>8</sub> P | 760.5876 | 760.5856 | 2.7 | [M+H] <sup>+</sup> |  | 478.32992 600.00 [M+H]-sn2-H2O<br>496.34048 600.00 [M+H]-sn2<br>504.34556 600.00 [M+H]-sn1-H2O<br>522.35612 600.00 [M+H]-sn1<br>577.51960 400.00 [M+H]-C5H14NO4P (-183)<br>701.51214 999.00 [M+H]-C3H9N (-59)<br>742.57508 400.00 [M+H]-H2O (-18) | C <sub>9</sub> H <sub>18</sub> , C <sub>11</sub> H <sub>22</sub>                                                                    |
| 36 | PC 18:0_16:0                         | 12.81 | C <sub>42</sub> H <sub>84</sub> NO <sub>8</sub> P | 762.6037 | 762.6013 | 3.1 | [M+H] <sup>+</sup> |  | 478.32990 600.00 [M+H]-sn2-H2O<br>496.34046 600.00 [M+H]-sn2<br>506.36118 600.00 [M+H]-sn1-H2O<br>524.37174 600.00 [M+H]-sn1<br>579.53522 400.00 [M+H]-C5H14NO4P (-183)<br>703.52776 999.00 [M+H]-C3H9N (-59)<br>744.59070 400.00 [M+H]-H2O (-18) | -                                                                                                                                   |
| 37 | PC 15:0_20:4 (5, 8, 11, 14)          | 9.72  | C <sub>43</sub> H <sub>78</sub> NO <sub>8</sub> P | 768.5587 | 768.5543 | 5.7 | [M+H] <sup>+</sup> |  | 464.31425 600.00 [M+H]-sn2-H2O<br>482.32481 600.00 [M+H]-sn2<br>526.32989 600.00 [M+H]-sn1-H2O<br>544.34045 600.00 [M+H]-sn1                                                                                                                      | C <sub>6</sub> H <sub>12</sub> , C <sub>9</sub> H <sub>16</sub> , C <sub>12</sub> H <sub>20</sub> , C <sub>15</sub> H <sub>24</sub> |

|    |                              |       |                                                   |          |          |      |                     |  |                                                                                                                                                                                                                                                   |                                                                                                   |
|----|------------------------------|-------|---------------------------------------------------|----------|----------|------|---------------------|--|---------------------------------------------------------------------------------------------------------------------------------------------------------------------------------------------------------------------------------------------------|---------------------------------------------------------------------------------------------------|
|    |                              |       |                                                   |          |          |      |                     |  | 585.48829 400.00 [M+H]-C5H14NO4P (-183)<br>709.48083 999.00 [M+H]-C3H9N (-59)<br>750.54377 400.00 [M+H]-H2O (-18)                                                                                                                                 |                                                                                                   |
| 38 | PC 17:0_18:2 (9, 12)         | 11.50 | C <sub>43</sub> H <sub>82</sub> NO <sub>8</sub> P | 772.5871 | 772.5856 | 1.9  | [M+H] <sup>+</sup>  |  | 492.34556 600.00 [M+H]-sn2-H2O<br>502.32992 600.00 [M+H]-sn1-H2O<br>510.35612 600.00 [M+H]-sn2<br>520.34048 600.00 [M+H]-sn1<br>589.51960 400.00 [M+H]-C5H14NO4P (-183)<br>713.51214 999.00 [M+H]-C3H9N (-59)<br>754.57508 400.00 [M+H]-H2O (-18) | C <sub>9</sub> H <sub>18</sub> , C <sub>11</sub> H <sub>20</sub>                                  |
| 39 | PC 18:3_18:3                 | 8.50  | C <sub>44</sub> H <sub>76</sub> NO <sub>8</sub> P | 800.5252 | 800.5207 | 5.7  | [M+Na] <sup>+</sup> |  | 463.22271 40.00 [M+Na]-59-sn1    [M+Na]-59-sn2<br>522.29621 20.00 [M+Na]-sn1-H2O    [M+Na]-sn2-H2O<br>540.30677 20.00 [M+Na]-sn1    [M+Na]-sn2<br>617.45461 600.00 [M+Na]-C5H14NO4P (-183)<br>741.44715 999.00 [M+Na]-C3H9N (-59)                 | /                                                                                                 |
| 40 | PC P-16:0_20:5               | 10.83 | C <sub>44</sub> H <sub>78</sub> NO <sub>7</sub> P | 764.5615 | 764.5594 | 2.7  | [M+H] <sup>+</sup>  |  | 462.33495 10.00 [M+H]-sn2-H2O<br>465.24073 100.00 [M+H]-sn1-C3H9N (-59)<br>480.34551 200.00 [M+H]-sn2<br>524.31423 999.00 [M+H]-sn1 (alkenyl ether loss)<br>581.49335 10.00 [M+H]-C5H14NO4P (-183)                                                | /                                                                                                 |
| 41 | PC 16:0_20:5                 | 9.41  | C <sub>44</sub> H <sub>78</sub> NO <sub>8</sub> P | 780.5564 | 780.5543 | 2.7  | [M+H] <sup>+</sup>  |  | 478.32989 600.00 [M+H]-sn2-H2O<br>496.34045 600.00 [M+H]-sn2<br>524.31425 600.00 [M+H]-sn1-H2O<br>542.32481 600.00 [M+H]-sn1<br>597.48829 400.00 [M+H]-C5H14NO4P (-183)<br>721.48083 999.00 [M+H]-C3H9N (-59)<br>762.54377 400.00 [M+H]-H2O (-18) | /                                                                                                 |
| 42 | PC 18:4 (3, 6, 9, 12)_18:0   | 9.92  | C <sub>44</sub> H <sub>80</sub> NO <sub>8</sub> P | 782.5643 | 782.5699 | -7.2 | [M+H] <sup>+</sup>  |  | 502.32987 600.00 [M+H]-sn1-H2O    [M+H]-sn2-H2O<br>520.34043 600.00 [M+H]-sn1    [M+H]-sn2<br>599.50391 400.00 [M+H]-C5H14NO4P (-183)<br>723.49645 999.00 [M+H]-C3H9N (-59)<br>764.55939 400.00 [M+H]-H2O (-18)                                   | C <sub>6</sub> H <sub>12</sub> , C <sub>9</sub> H <sub>16</sub> , C <sub>12</sub> H <sub>20</sub> |
| 43 | PC 18:2 (9, 12)_18:2 (9, 12) | 10.47 | C <sub>44</sub> H <sub>80</sub> NO <sub>8</sub> P | 782.5732 | 782.5699 | 4.2  | [M+H] <sup>+</sup>  |  | 478.32987 600.00 [M+H]-sn2-H2O<br>496.34043 600.00 [M+H]-sn2<br>526.32987 600.00 [M+H]-sn1-H2O<br>544.34043 600.00 [M+H]-sn1<br>599.50391 400.00 [M+H]-C5H14NO4P (-183)<br>723.49645 999.00 [M+H]-C3H9N (-59)<br>764.55939 400.00 [M+H]-H2O (-18) | C <sub>9</sub> H <sub>16</sub> , C <sub>6</sub> H <sub>12</sub>                                   |
| 44 | PC 18:0_18:3 (6, 9, 12)      | 10.26 | C <sub>44</sub> H <sub>82</sub> NO <sub>8</sub> P | 784.5861 | 784.5856 | 0.6  | [M+H] <sup>+</sup>  |  | 502.32992 600.00 [M+H]-sn1-H2O<br>504.34556 600.00 [M+H]-sn2-H2O<br>520.34048 600.00 [M+H]-sn1<br>522.35612 600.00 [M+H]-sn2<br>601.51960 400.00 [M+H]-C5H14NO4P (-183)<br>725.51214 999.00 [M+H]-C3H9N (-59)<br>766.57508 400.00 [M+H]-H2O (-18) | C <sub>6</sub> H <sub>12</sub> , C <sub>9</sub> H <sub>16</sub> , C <sub>12</sub> H <sub>20</sub> |
| 45 | PC P-16:0_20:2 (11, 14)      | 11.46 | C <sub>44</sub> H <sub>84</sub> NO <sub>7</sub> P | 770.6042 | 770.6063 | -2.8 | [M+H] <sup>+</sup>  |  | 462.33497 10.00 [M+H]-sn2-H2O<br>471.28767 100.00 [M+H]-sn1-C3H9N (-59)<br>480.34553 200.00 [M+H]-sn2<br>530.36117 999.00 [M+H]-sn1 (alkenyl ether loss)<br>587.54029 10.00 [M+H]-C5H14NO4P (-183)                                                | C <sub>6</sub> H <sub>12</sub> , C <sub>9</sub> H <sub>16</sub>                                   |
| 46 | PC 18:0_18:2 (9, 12)         | 12.04 | C <sub>44</sub> H <sub>84</sub> NO <sub>8</sub> P | 786.6044 | 786.6013 | 4.0  | [M+H] <sup>+</sup>  |  | 502.32990 600.00 [M+H]-sn1-H2O<br>506.36118 600.00 [M+H]-sn2-H2O<br>520.34046 600.00 [M+H]-sn1<br>524.37174 600.00 [M+H]-sn2<br>603.53522 400.00 [M+H]-C5H14NO4P (-183)<br>727.52776 999.00 [M+H]-C3H9N (-59)<br>768.59070 400.00 [M+H]-H2O (-18) | C <sub>6</sub> H <sub>12</sub> , C <sub>9</sub> H <sub>16</sub>                                   |

|    |                                     |       |                                                   |          |          |      |                    |                                                                                                                                                                                                                                                                                                                                                           |                                                                                                                                                                                                          |
|----|-------------------------------------|-------|---------------------------------------------------|----------|----------|------|--------------------|-----------------------------------------------------------------------------------------------------------------------------------------------------------------------------------------------------------------------------------------------------------------------------------------------------------------------------------------------------------|----------------------------------------------------------------------------------------------------------------------------------------------------------------------------------------------------------|
| 47 | PC 18:0_18:1 (11)                   | 13.15 | C <sub>44</sub> H <sub>86</sub> NO <sub>8</sub> P | 788.6197 | 788.6170 | 3.5  | [M+H] <sup>+</sup> | 504.34559 600.00 [M+H]-sn1-H <sub>2</sub> O<br>506.36123 600.00 [M+H]-sn2-H <sub>2</sub> O<br>522.35615 600.00 [M+H]-sn1<br>524.37179 600.00 [M+H]-sn2<br>605.55091 400.00 [M+H]-C <sub>5</sub> H <sub>14</sub> NO <sub>4</sub> P (-183)<br>729.54345 999.00 [M+H]-C <sub>3</sub> H <sub>9</sub> N (-59)<br>770.60639 400.00 [M+H]-H <sub>2</sub> O (-18) | C <sub>9</sub> H <sub>18</sub>                                                                                                                                                                           |
| 48 | PC 17:0_20:4 (5, 8, 11, 14)         | 11.3  | C <sub>45</sub> H <sub>82</sub> NO <sub>8</sub> P | 796.5819 | 796.5856 | -4.7 | [M+H] <sup>+</sup> | 492.34556 600.00 [M+H]-sn2-H <sub>2</sub> O<br>510.35612 600.00 [M+H]-sn2<br>526.32992 600.00 [M+H]-sn1-H <sub>2</sub> O<br>544.34048 600.00 [M+H]-sn1<br>613.51960 400.00 [M+H]-C <sub>5</sub> H <sub>14</sub> NO <sub>4</sub> P (-183)<br>737.51214 999.00 [M+H]-C <sub>3</sub> H <sub>9</sub> N (-59)<br>778.57508 400.00 [M+H]-H <sub>2</sub> O (-18) | C <sub>6</sub> H <sub>12</sub> , C <sub>9</sub> H <sub>16</sub> , C <sub>12</sub> H <sub>20</sub> , C <sub>15</sub> H <sub>24</sub>                                                                      |
| 49 | PC 17:0_20:3 (8, 11, 14)            | 11.7  | C <sub>45</sub> H <sub>84</sub> NO <sub>8</sub> P | 798.6031 | 798.6007 | 3.0  | [M+H] <sup>+</sup> | 492.34554 600.00 [M+H]-sn2-H <sub>2</sub> O<br>510.35610 600.00 [M+H]-sn2<br>528.34554 600.00 [M+H]-sn1-H <sub>2</sub> O<br>546.35610 600.00 [M+H]-sn1<br>615.53522 400.00 [M+H]-C <sub>5</sub> H <sub>14</sub> NO <sub>4</sub> P (-183)<br>739.52776 999.00 [M+H]-C <sub>3</sub> H <sub>9</sub> N (-59)<br>780.59070 400.00 [M+H]-H <sub>2</sub> O (-18) | C <sub>6</sub> H <sub>12</sub> , C <sub>9</sub> H <sub>16</sub> , C <sub>12</sub> H <sub>20</sub>                                                                                                        |
| 50 | PC 16:0_22:6 (4, 7, 10, 13, 16, 19) | 9.33  | C <sub>46</sub> H <sub>80</sub> NO <sub>8</sub> P | 806.5721 | 806.5699 | 2.7  | [M+H] <sup>+</sup> | 478.32987 600.00 [M+H]-sn2-H <sub>2</sub> O<br>496.34043 600.00 [M+H]-sn2<br>550.32987 600.00 [M+H]-sn1-H <sub>2</sub> O<br>568.34043 600.00 [M+H]-sn1<br>623.50391 400.00 [M+H]-C <sub>5</sub> H <sub>14</sub> NO <sub>4</sub> P (-183)<br>747.49645 999.00 [M+H]-C <sub>3</sub> H <sub>9</sub> N (-59)<br>788.55939 400.00 [M+H]-H <sub>2</sub> O (-18) | C <sub>3</sub> H <sub>6</sub> , C <sub>6</sub> H <sub>10</sub> , C <sub>9</sub> H <sub>14</sub> , C <sub>12</sub> H <sub>18</sub> ,<br>C <sub>15</sub> H <sub>22</sub> , C <sub>18</sub> H <sub>26</sub> |
| 51 | PC 18:2 (9, 12)_20:4 (5, 8, 11, 14) | 8.66  | C <sub>46</sub> H <sub>80</sub> NO <sub>8</sub> P | 806.5728 | 806.5699 | 3.6  | [M+H] <sup>+</sup> | 478.32987 600.00 [M+H]-sn2-H <sub>2</sub> O<br>496.34043 600.00 [M+H]-sn2<br>550.32987 600.00 [M+H]-sn1-H <sub>2</sub> O<br>568.34043 600.00 [M+H]-sn1<br>623.50391 400.00 [M+H]-C <sub>5</sub> H <sub>14</sub> NO <sub>4</sub> P (-183)<br>747.49645 999.00 [M+H]-C <sub>3</sub> H <sub>9</sub> N (-59)<br>788.55939 400.00 [M+H]-H <sub>2</sub> O (-18) | C <sub>6</sub> H <sub>12</sub> , C <sub>9</sub> H <sub>16</sub> , C <sub>12</sub> H <sub>20</sub> ,<br>C <sub>15</sub> H <sub>24</sub>                                                                   |
| 52 | PC 18:1 (9)_20:4 (5, 8, 11, 14)     | 10.60 | C <sub>46</sub> H <sub>82</sub> NO <sub>8</sub> P | 808.5843 | 808.5851 | -1.0 | [M+H] <sup>+</sup> | 504.34556 600.00 [M+H]-sn2-H <sub>2</sub> O<br>522.35612 600.00 [M+H]-sn2<br>526.32992 600.00 [M+H]-sn1-H <sub>2</sub> O<br>544.34048 600.00 [M+H]-sn1<br>625.51960 400.00 [M+H]-C <sub>5</sub> H <sub>14</sub> NO <sub>4</sub> P (-183)<br>749.51214 999.00 [M+H]-C <sub>3</sub> H <sub>9</sub> N (-59)<br>790.57508 400.00 [M+H]-H <sub>2</sub> O (-18) | C <sub>9</sub> H <sub>18</sub> , C <sub>6</sub> H <sub>12</sub> , C <sub>9</sub> H <sub>16</sub> , C <sub>12</sub> H <sub>20</sub> ,<br>C <sub>15</sub> H <sub>24</sub>                                  |
| 53 | PC 18:0_20:4 (5, 8, 11, 14)         | 11.60 | C <sub>46</sub> H <sub>84</sub> NO <sub>8</sub> P | 810.6036 | 810.6013 | 2.8  | [M+H] <sup>+</sup> | 506.36118 600.00 [M+H]-sn2-H <sub>2</sub> O<br>524.37174 600.00 [M+H]-sn2<br>526.32990 600.00 [M+H]-sn1-H <sub>2</sub> O<br>544.34046 600.00 [M+H]-sn1<br>627.53522 400.00 [M+H]-C <sub>5</sub> H <sub>14</sub> NO <sub>4</sub> P (-183)<br>751.52776 999.00 [M+H]-C <sub>3</sub> H <sub>9</sub> N (-59)<br>792.59070 400.00 [M+H]-H <sub>2</sub> O (-18) | C <sub>6</sub> H <sub>12</sub> , C <sub>9</sub> H <sub>16</sub> , C <sub>12</sub> H <sub>20</sub> , C <sub>15</sub> H <sub>24</sub>                                                                      |
| 54 | PC 18:0_20:3 (8, 11, 14)            | 12.60 | C <sub>46</sub> H <sub>86</sub> NO <sub>8</sub> P | 812.6182 | 812.6169 | 1.7  | [M+H] <sup>+</sup> | 506.36123 600.00 [M+H]-sn2-H <sub>2</sub> O<br>524.37179 600.00 [M+H]-sn2<br>528.34559 600.00 [M+H]-sn1-H <sub>2</sub> O<br>546.35615 600.00 [M+H]-sn1<br>629.55091 400.00 [M+H]-C <sub>5</sub> H <sub>14</sub> NO <sub>4</sub> P (-183)<br>753.54345 999.00 [M+H]-C <sub>3</sub> H <sub>9</sub> N (-59)<br>794.60639 400.00 [M+H]-H <sub>2</sub> O (-18) | C <sub>6</sub> H <sub>12</sub> , C <sub>9</sub> H <sub>16</sub> , C <sub>12</sub> H <sub>20</sub>                                                                                                        |
| 55 | PC 18:2 (9, 12)_20:0                | 13.31 | C <sub>46</sub> H <sub>88</sub> NO <sub>8</sub> P | 814.6330 | 814.6326 | 0.5  | [M+H] <sup>+</sup> | 502.32994 600.00 [M+H]-sn2-H <sub>2</sub> O<br>520.34050 600.00 [M+H]-sn2<br>534.39250 600.00 [M+H]-sn1-H <sub>2</sub> O<br>552.40306 600.00 [M+H]-sn1<br>631.56654 400.00 [M+H]-C <sub>5</sub> H <sub>14</sub> NO <sub>4</sub> P (-183)                                                                                                                  | C <sub>6</sub> H <sub>12</sub> , C <sub>9</sub> H <sub>16</sub>                                                                                                                                          |

|    |                                     |       |                                                   |          |          |      |                     |  |                                                                                                                                                                                                                                                                                   |                                                                                                                                                                                                          |
|----|-------------------------------------|-------|---------------------------------------------------|----------|----------|------|---------------------|--|-----------------------------------------------------------------------------------------------------------------------------------------------------------------------------------------------------------------------------------------------------------------------------------|----------------------------------------------------------------------------------------------------------------------------------------------------------------------------------------------------------|
|    |                                     |       |                                                   |          |          |      |                     |  | 755.55908 999.00 [M+H]-C3H9N (-59)<br>796.62202 400.00 [M+H]-H2O (-18)                                                                                                                                                                                                            |                                                                                                                                                                                                          |
| 56 | PC 22:4 (10, 13, 16, 19)_17:0       | 11.98 | C <sub>47</sub> H <sub>86</sub> NO <sub>8</sub> P | 846.6003 | 846.5983 | 2.4  | [M+Na] <sup>+</sup> |  | 483.28532 40.00 [M+Na]-59-sn2<br>489.23840 40.00 [M+Na]-59-sn1<br>542.35882 20.00 [M+Na]-sn2-H2O<br>548.31190 20.00 [M+Na]-sn1-H2O<br>560.36938 20.00 [M+Na]-sn2<br>566.32246 20.00 [M+Na]-sn1<br>663.53286 600.00 [M+Na]-C5H14NO4P (-183)<br>787.52540 999.00 [M+Na]-C3H9N (-59) | C <sub>3</sub> H <sub>6</sub> , C <sub>6</sub> H <sub>10</sub> , C <sub>9</sub> H <sub>14</sub> , C <sub>12</sub> H <sub>18</sub>                                                                        |
| 57 | PC 18:1_22:6                        | 10.10 | C <sub>48</sub> H <sub>82</sub> NO <sub>8</sub> P | 832.5868 | 832.5856 | 1.4  | [M+H] <sup>+</sup>  |  | 504.34556 600.00 [M+H]-sn2-H2O<br>522.35612 600.00 [M+H]-sn2<br>550.32992 600.00 [M+H]-sn1-H2O<br>568.34048 600.00 [M+H]-sn1<br>649.51960 400.00 [M+H]-C5H14NO4P (-183)<br>773.51214 999.00 [M+H]-C3H9N (-59)<br>814.57508 400.00 [M+H]-H2O (-18)                                 | /                                                                                                                                                                                                        |
| 58 | PC 18:0_22:6 (4, 7, 10, 13, 16, 19) | 11.60 | C <sub>48</sub> H <sub>84</sub> NO <sub>8</sub> P | 834.6008 | 834.6013 | -0.6 | [M+H] <sup>+</sup>  |  | 506.36118 600.00 [M+H]-sn2-H2O<br>524.37174 600.00 [M+H]-sn2<br>550.32990 600.00 [M+H]-sn1-H2O<br>568.34046 600.00 [M+H]-sn1<br>651.53522 400.00 [M+H]-C5H14NO4P (-183)<br>775.52776 999.00 [M+H]-C3H9N (-59)<br>816.59070 400.00 [M+H]-H2O (-18)                                 | C <sub>3</sub> H <sub>6</sub> , C <sub>6</sub> H <sub>10</sub> , C <sub>9</sub> H <sub>14</sub> , C <sub>12</sub> H <sub>18</sub> ,<br>C <sub>15</sub> H <sub>22</sub> , C <sub>18</sub> H <sub>26</sub> |
| 59 | PC 18:0_22:5 (4, 7, 10, 13, 16)     | 12.30 | C <sub>48</sub> H <sub>86</sub> NO <sub>8</sub> P | 836.6166 | 836.6170 | -0.4 | [M+H] <sup>+</sup>  |  | 506.36123 600.00 [M+H]-sn2-H2O<br>524.37179 600.00 [M+H]-sn2<br>552.34559 600.00 [M+H]-sn1-H2O<br>570.35615 600.00 [M+H]-sn1<br>653.55091 400.00 [M+H]-C5H14NO4P (-183)<br>777.54345 999.00 [M+H]-C3H9N (-59)<br>818.60639 400.00 [M+H]-H2O (-18)                                 | C <sub>3</sub> H <sub>6</sub> , C <sub>6</sub> H <sub>10</sub> , C <sub>9</sub> H <sub>14</sub> , C <sub>12</sub> H <sub>18</sub> ,<br>C <sub>15</sub> H <sub>22</sub> , C <sub>18</sub> H <sub>26</sub> |
| 60 | PC 18:0_22:4 (7, 10, 13, 16)        | 12.90 | C <sub>48</sub> H <sub>88</sub> NO <sub>8</sub> P | 838.6345 | 838.6326 | 2.3  | [M+H] <sup>+</sup>  |  | 506.36122 600.00 [M+H]-sn2-H2O<br>524.37178 600.00 [M+H]-sn2<br>554.36122 600.00 [M+H]-sn1-H2O<br>572.37178 600.00 [M+H]-sn1<br>655.56654 400.00 [M+H]-C5H14NO4P (-183)<br>779.55908 999.00 [M+H]-C3H9N (-59)<br>820.62202 400.00 [M+H]-H2O (-18)                                 | C <sub>6</sub> H <sub>12</sub> , C <sub>9</sub> H <sub>16</sub> , C <sub>12</sub> H <sub>20</sub> , C <sub>15</sub> H <sub>24</sub>                                                                      |
| 61 | PC P-18:0_22:2 (13, 16)             | 13.86 | C <sub>48</sub> H <sub>92</sub> NO <sub>7</sub> P | 848.6534 | 848.6504 | 3.6  | [M+Na] <sup>+</sup> |  | 307.30027 10.00 [M+Na]-183-Na-sn2<br>643.60291 40.00 [M+Na]-183-Na+H<br>665.58486 40.00 [M+Na]-C5H14NO4P (-183)<br>789.57740 999.00 [M+Na]-C3H9N (-59)                                                                                                                            | C <sub>6</sub> H <sub>12</sub> , C <sub>9</sub> H <sub>16</sub>                                                                                                                                          |
| 62 | PC P-16:0_24:1 (18/15)              | 15.40 | C <sub>48</sub> H <sub>94</sub> NO <sub>7</sub> P | 850.6725 | 850.6660 | 7.6  | [M+Na] <sup>+</sup> |  | 279.26904 10.00 [M+Na]-183-Na-sn2<br>645.61860 40.00 [M+Na]-183-Na+H<br>667.60055 40.00 [M+Na]-C5H14NO4P (-183)<br>791.59309 999.00 [M+Na]-C3H9N (-59)                                                                                                                            | C <sub>9</sub> H <sub>18</sub> , C <sub>6</sub> H <sub>12</sub>                                                                                                                                          |
| 63 | PC P-20:0_22:5 (4, 7, 10, 13, 16)   | 12.20 | C <sub>50</sub> H <sub>90</sub> NO <sub>7</sub> P | 870.6366 | 870.6347 | 2.2  | [M+Na] <sup>+</sup> |  | 335.33157 10.00 [M+Na]-183-Na-sn2<br>665.58729 40.00 [M+Na]-183-Na+H<br>687.56924 40.00 [M+Na]-C5H14NO4P (-183)<br>811.56178 999.00 [M+Na]-C3H9N (-59)                                                                                                                            | C <sub>6</sub> H <sub>12</sub> , C <sub>9</sub> H <sub>16</sub> , C <sub>12</sub> H <sub>20</sub> , C <sub>15</sub> H <sub>24</sub>                                                                      |
| 64 | PC P-20:0_22:4 (7, 10, 13, 16)      | 13.55 | C <sub>50</sub> H <sub>92</sub> NO <sub>7</sub> P | 872.6518 | 872.6509 | 1.0  | [M+Na] <sup>+</sup> |  | 307.30027 10.00 [M+Na]-183-Na-sn2<br>667.60291 40.00 [M+Na]-183-Na+H<br>689.58486 40.00 [M+Na]-C5H14NO4P (-183)<br>813.57740 999.00 [M+Na]-C3H9N (-59)                                                                                                                            | C <sub>6</sub> H <sub>12</sub> , C <sub>9</sub> H <sub>16</sub> , C <sub>12</sub> H <sub>20</sub> , C <sub>15</sub> H <sub>24</sub>                                                                      |
| 65 | PC P-20:0_22:4                      | 13.72 | C <sub>50</sub> H <sub>92</sub> NO <sub>7</sub> P | 872.6555 | 872.6509 | 5.3  | [M+Na] <sup>+</sup> |  | 307.30027 10.00 [M+Na]-183-Na-sn2<br>667.60291 40.00 [M+Na]-183-Na+H<br>689.58486 40.00 [M+Na]-C5H14NO4P (-183)<br>813.57740 999.00 [M+Na]-C3H9N (-59)                                                                                                                            | /                                                                                                                                                                                                        |
| 66 | PC P-18:0_26:1                      | 16.33 | C <sub>51</sub> H <sub>98</sub> NO <sub>8</sub> P | 906.7365 | 906.7291 | 8.2  | [M+Na] <sup>+</sup> |  | 511.31663 40.00 [M+Na]-59-sn2<br>521.30099 40.00 [M+Na]-59-sn1<br>570.39013 20.00 [M+Na]-sn2-H2O                                                                                                                                                                                  | /                                                                                                                                                                                                        |

|    |                               |       |                                                   |          |          |      |         |                                          |                                                                                                                                     |
|----|-------------------------------|-------|---------------------------------------------------|----------|----------|------|---------|------------------------------------------|-------------------------------------------------------------------------------------------------------------------------------------|
|    |                               |       |                                                   |          |          |      |         | 580.37449 20.00 [M+Na]-sn1-H2O           |                                                                                                                                     |
|    |                               |       |                                                   |          |          |      |         | 588.40069 20.00 [M+Na]-sn2               |                                                                                                                                     |
|    |                               |       |                                                   |          |          |      |         | 598.38505 20.00 [M+Na]-sn1               |                                                                                                                                     |
|    |                               |       |                                                   |          |          |      |         | 723.62673 600.00 [M+Na]-C5H14NO4P (-183) |                                                                                                                                     |
|    |                               |       |                                                   |          |          |      |         | 847.61927 999.00 [M+Na]-C3H9N (-59)      |                                                                                                                                     |
| 67 | PC P-20:0_24:4 (5, 8, 11, 14) | 15.16 | C <sub>52</sub> H <sub>96</sub> NO <sub>7</sub> P | 900.6755 | 900.6822 | -7.4 | [M+Na]+ | 335.33158 10.00 [M+Na]-183-Na-sn2        | C <sub>6</sub> H <sub>12</sub> , C <sub>9</sub> H <sub>16</sub> , C <sub>12</sub> H <sub>20</sub> , C <sub>15</sub> H <sub>24</sub> |
|    |                               |       |                                                   |          |          |      |         | 695.63422 40.00 [M+Na]-183-Na+H          |                                                                                                                                     |
|    |                               |       |                                                   |          |          |      |         | 717.61617 40.00 [M+Na]-C5H14NO4P (-183)  |                                                                                                                                     |
|    |                               |       |                                                   |          |          |      |         | 841.60871 999.00 [M+Na]-C3H9N (-59)      |                                                                                                                                     |

Note: In the first column from right, "-" denotes the saturated lipids and "/" denotes the unsaturated lipids but the C=C bonds positions were not identified. The chemical formulas were simulated based on the exact masses of diagnostic ions P1b (only containing the C and H atoms). The match details in the second column from right include: *m/z* values of product ions, their intensities, and possible explanations. The (1*Z*)-alkenyl ether (neutral Plasmalogen) species is represented by the "P-" prefix in the second column from left.



**Table S4.** PE and LPE identified from human serum extract.

| No. | Identification        | RT (min) | Formula                                           | Observed m/z | Calculated m/z | Error (ppm) | Adduct              | Match details                                                                                                                                                                                                                                                                                                                                                                                                    | Formula of neutral loss molecules for C=C analysis              |
|-----|-----------------------|----------|---------------------------------------------------|--------------|----------------|-------------|---------------------|------------------------------------------------------------------------------------------------------------------------------------------------------------------------------------------------------------------------------------------------------------------------------------------------------------------------------------------------------------------------------------------------------------------|-----------------------------------------------------------------|
| 1   | LPE 16:0              | 2.55     | C <sub>21</sub> H <sub>44</sub> NO <sub>7</sub> P | 454.2936     | 454.2934       | 0.4         | [M+H] <sup>+</sup>  | 198.05329 10.00 [M+H]-sn1-H <sub>2</sub> O<br>216.06385 10.00 [M+H]-sn1<br>313.27428 999.00 [M+H]-C <sub>3</sub> H <sub>8</sub> NO <sub>6</sub> P (-141)<br>393.24061 200.00 [M+H]- (C <sub>2</sub> NH <sub>5</sub> +H <sub>2</sub> O (-61)<br>436.28281 999.00 [M+H]-H <sub>2</sub> O (-18)                                                                                                                     | -                                                               |
| 2   | LPE 18:2)             | 1.74     | C <sub>23</sub> H <sub>44</sub> NO <sub>7</sub> P | 478.2946     | 478.2934       | 2.5         | [M+H] <sup>+</sup>  | 198.05329 10.00 [M+H]-sn1-H <sub>2</sub> O<br>216.06385 10.00 [M+H]-sn1<br>337.27428 999.00 [M+H]-C <sub>3</sub> H <sub>8</sub> NO <sub>6</sub> P (-141)<br>417.24061 200.00 [M+H]- (C <sub>2</sub> NH <sub>5</sub> +H <sub>2</sub> O (-61)<br>460.28281 999.00 [M+H]-H <sub>2</sub> O (-18)                                                                                                                     | /                                                               |
| 3   | LPE 18:1 (9)          | 2.40     | C <sub>23</sub> H <sub>46</sub> NO <sub>7</sub> P | 480.3103     | 480.3090       | 2.7         | [M+H] <sup>+</sup>  | 198.05328 10.00 [M+H]-sn1-H <sub>2</sub> O<br>216.06384 10.00 [M+H]-sn1<br>339.28990 999.00 [M+H]-C <sub>3</sub> H <sub>8</sub> NO <sub>6</sub> P (-141)<br>419.25624 200.00 [M+H]- (C <sub>2</sub> NH <sub>5</sub> +H <sub>2</sub> O (-61)<br>462.29844 999.00 [M+H]-H <sub>2</sub> O (-18)                                                                                                                     | /                                                               |
| 4   | LPE 18:0              | 3.98     | C <sub>23</sub> H <sub>48</sub> NO <sub>7</sub> P | 482.3259     | 482.3246       | 2.7         | [M+H] <sup>+</sup>  | 198.05329 10.00 [M+H]-sn1-H <sub>2</sub> O<br>216.06385 10.00 [M+H]-sn1<br>341.30556 999.00 [M+H]-C <sub>3</sub> H <sub>8</sub> NO <sub>6</sub> P (-141)<br>421.27189 200.00 [M+H]- (C <sub>2</sub> NH <sub>5</sub> +H <sub>2</sub> O (-61)<br>464.31409 999.00 [M+H]-H <sub>2</sub> O (-18)                                                                                                                     | -                                                               |
| 5   | LPE (20:4)            | 1.67     | C <sub>25</sub> H <sub>44</sub> NO <sub>7</sub> P | 502.2950     | 502.2910       | 8.0         | [M+H] <sup>+</sup>  | 198.05329 10.00 [M+H]-sn1-H <sub>2</sub> O<br>216.06385 10.00 [M+H]-sn1<br>361.27428 999.00 [M+H]-C <sub>3</sub> H <sub>8</sub> NO <sub>6</sub> P (-141)<br>441.24061 200.00 [M+H]- (C <sub>2</sub> NH <sub>5</sub> +H <sub>2</sub> O (-61)<br>484.28281 999.00 [M+H]-H <sub>2</sub> O (-18)                                                                                                                     | /                                                               |
| 6   | PE (3:0_18:4)         | 1.80     | C <sub>26</sub> H <sub>44</sub> NO <sub>8</sub> P | 530.2895     | 530.2883       | 2.2         | [M+H] <sup>+</sup>  | 57.03402 1.00 sn1-O<br>254.07948 1.00 [M+H]-sn2-H <sub>2</sub> O<br>259.20606 1.00 sn2-O<br>272.09004 1.00 [M+H]-sn2<br>389.26918 999.00 [M+H]-C <sub>2</sub> H <sub>8</sub> NO <sub>4</sub> P (-141)<br>456.25152 1.00 [M+H]-sn1-H <sub>2</sub> O<br>474.26208 1.00 [M+H]-sn1<br>512.27772 1.00 [M+H]-H <sub>2</sub> O (-18)                                                                                    | /                                                               |
| 7   | LPE (22:6)            | 1.54     | C <sub>27</sub> H <sub>44</sub> NO <sub>7</sub> P | 526.2941     | 526.2933       | 1.5         | [M+H] <sup>+</sup>  | 198.05326 10.00 [M+H]-sn1-H <sub>2</sub> O<br>216.06382 10.00 [M+H]-sn1<br>385.27425 999.00 [M+H]-C <sub>3</sub> H <sub>8</sub> NO <sub>6</sub> P (-141)<br>465.24058 200.00 [M+H]- (C <sub>2</sub> NH <sub>5</sub> +H <sub>2</sub> O (-61)<br>508.28278 999.00 [M+H]-H <sub>2</sub> O (-18)                                                                                                                     | /                                                               |
| 8   | PE P-16:0_18:2        | 11.90    | C <sub>39</sub> H <sub>74</sub> NO <sub>7</sub> P | 700.5300     | 700.5276       | 3.4         | [M+H] <sup>+</sup>  | 266.28461 150.00 sn1 ether +C <sub>2</sub> H <sub>8</sub> NO <sub>3</sub> P-H <sub>3</sub> PO <sub>4</sub><br>337.27439 200.00 [M+H]-C <sub>2</sub> H <sub>8</sub> NO <sub>4</sub> P-sn2<br>364.26151 999.00 sn1 ether + C <sub>2</sub> H <sub>8</sub> NO <sub>3</sub> P (+124)<br>559.50899 30.00 [M+H]-C <sub>2</sub> H <sub>8</sub> NO <sub>4</sub> P (-141)<br>682.51752 100.00 [M+H]-H <sub>2</sub> O (-18) | /                                                               |
| 9   | PE 16:0_18:2 (10, 13) | 11.10    | C <sub>39</sub> H <sub>74</sub> NO <sub>8</sub> P | 716.5250     | 716.5225       | 3.5         | [M+H] <sup>+</sup>  | 239.23734 1.00 sn1-O<br>263.23734 1.00 sn2-O<br>436.28294 1.00 [M+H]-sn2-H <sub>2</sub> O<br>454.29350 1.00 [M+H]-sn2<br>460.28294 1.00 [M+H]-sn1-H <sub>2</sub> O<br>478.29350 1.00 [M+H]-sn1<br>575.50392 999.00 [M+H]-C <sub>2</sub> H <sub>8</sub> NO <sub>4</sub> P (-141)<br>698.51246 1.00 [M+H]-H <sub>2</sub> O (-18)                                                                                   | C <sub>5</sub> H <sub>10</sub> , C <sub>8</sub> H <sub>14</sub> |
| 10  | PE 16:0_18:1          | 12.30    | C <sub>39</sub> H <sub>76</sub> NO <sub>8</sub> P | 740.5235     | 740.5201       | 4.6         | [M+Na] <sup>+</sup> | 415.22273 3.00 [M+Na]-43-SN2-H<br>441.23837 3.00 [M+Na]-43-SN1-H<br>599.50156 400.00 [M+Na]-C <sub>2</sub> H <sub>8</sub> NO <sub>4</sub> P (-141)<br>697.47845 999.00 [M+Na]-C <sub>2</sub> H <sub>5</sub> N (-43)                                                                                                                                                                                              | /                                                               |

|    |                                 |       |                                                   |          |          |      |                     |                                                                                                                                                                                                                                                                                                                                                                                                                                                                                 |                                                                 |
|----|---------------------------------|-------|---------------------------------------------------|----------|----------|------|---------------------|---------------------------------------------------------------------------------------------------------------------------------------------------------------------------------------------------------------------------------------------------------------------------------------------------------------------------------------------------------------------------------------------------------------------------------------------------------------------------------|-----------------------------------------------------------------|
| 11 | PE P-16:0_20:4                  | 11.60 | C <sub>41</sub> H <sub>74</sub> NO <sub>7</sub> P | 746.5105 | 746.5100 | 0.6  | [M+Na] <sup>+</sup> | 386.24346 100.00 sn1 ether +C <sub>2</sub> H <sub>8</sub> NO <sub>3</sub> P+Na (+124+23)<br>583.50899 40.00 [M+Na]-C <sub>2</sub> H <sub>8</sub> NO <sub>4</sub> P-Na+H<br>605.49094 50.00 [M+Na]-C <sub>2</sub> H <sub>8</sub> NO <sub>4</sub> P (-141)<br>623.50150 40.00 [M+Na]-C <sub>2</sub> H <sub>8</sub> NO <sub>4</sub> P+H <sub>2</sub> O (-141+18)<br>703.46783 999.00 [M+Na]-C <sub>2</sub> H <sub>5</sub> N (-43)<br>728.49947 20.00 [M+Na]-H <sub>2</sub> O (-18) | /                                                               |
| 12 | PE 18:1_18:2                    | 11.12 | C <sub>41</sub> H <sub>76</sub> NO <sub>8</sub> P | 742.5425 | 742.5387 | 5.1  | [M+H] <sup>+</sup>  | 263.23734 1.00 sn2-O<br>265.25298 1.00 sn1-O<br>460.28298 1.00 [M+H]-sn1-H <sub>2</sub> O<br>462.29862 1.00 [M+H]-sn2-H <sub>2</sub> O<br>478.29354 1.00 [M+H]-sn1<br>480.30918 1.00 [M+H]-sn2<br>601.51961 999.00 [M+H]-C <sub>2</sub> H <sub>8</sub> NO <sub>4</sub> P (-141)<br>724.52814 1.00 [M+H]-H <sub>2</sub> O (-18)                                                                                                                                                  | /                                                               |
| 13 | PE P-18:0_18:2                  | 13.10 | C <sub>41</sub> H <sub>78</sub> NO <sub>7</sub> P | 728.5620 | 728.5589 | 4.3  | [M+H] <sup>+</sup>  | 294.31589 150.00 sn1 ether +C <sub>2</sub> H <sub>8</sub> NO <sub>3</sub> P-H <sub>3</sub> PO <sub>4</sub><br>337.27442 200.00 [M+H]-C <sub>2</sub> H <sub>8</sub> NO <sub>4</sub> P-sn2<br>392.29279 999.00 sn1 ether + C <sub>2</sub> H <sub>8</sub> NO <sub>3</sub> P (+124)<br>587.54030 30.00 [M+H]-C <sub>2</sub> H <sub>8</sub> NO <sub>4</sub> P (-141)<br>710.54883 100.00 [M+H]-H <sub>2</sub> O (-18)                                                                | /                                                               |
| 14 | PE 18:1_18:1                    | 12.40 | C <sub>41</sub> H <sub>78</sub> NO <sub>8</sub> P | 744.5571 | 744.5538 | 4.5  | [M+H] <sup>+</sup>  | 265.25298 1.00 sn1-O    sn2-O<br>462.29861 1.00 [M+H]-sn1-H <sub>2</sub> O    [M+H]-sn2-H <sub>2</sub> O<br>480.30917 1.00 [M+H]-sn1    [M+H]-sn2<br>603.53523 999.00 [M+H]-C <sub>2</sub> H <sub>8</sub> NO <sub>4</sub> P (-141)<br>726.54377 1.00 [M+H]-H <sub>2</sub> O (-18)                                                                                                                                                                                               | /                                                               |
| 15 | PE P-18:0_18:0                  | 14.08 | C <sub>41</sub> H <sub>82</sub> NO <sub>7</sub> P | 732.5857 | 732.5907 | -6.8 | [M+H] <sup>+</sup>  | 294.31589 150.00 sn1 ether +C <sub>2</sub> H <sub>8</sub> NO <sub>3</sub> P-H <sub>3</sub> PO <sub>4</sub><br>341.30574 200.00 [M+H]-C <sub>2</sub> H <sub>8</sub> NO <sub>4</sub> P-sn2<br>392.29279 999.00 sn1 ether + C <sub>2</sub> H <sub>8</sub> NO <sub>3</sub> P (+124)<br>591.57162 30.00 [M+H]-C <sub>2</sub> H <sub>8</sub> NO <sub>4</sub> P (-141)<br>714.58015 100.00 [M+H]-H <sub>2</sub> O (-18)                                                                | -                                                               |
| 16 | PE P-16:0_22:6                  | 10.49 | C <sub>43</sub> H <sub>74</sub> NO <sub>7</sub> P | 748.5310 | 748.5281 | 3.9  | [M+H] <sup>+</sup>  | 266.28461 150.00 sn1 ether +C <sub>2</sub> H <sub>8</sub> NO <sub>3</sub> P-H <sub>3</sub> PO <sub>4</sub><br>364.26151 999.00 sn1 ether + C <sub>2</sub> H <sub>8</sub> NO <sub>3</sub> P (+124)<br>385.27439 200.00 [M+H]-C <sub>2</sub> H <sub>8</sub> NO <sub>4</sub> P-sn2<br>607.50899 30.00 [M+H]-C <sub>2</sub> H <sub>8</sub> NO <sub>4</sub> P (-141)<br>730.51752 100.00 [M+H]-H <sub>2</sub> O (-18)                                                                | /                                                               |
| 17 | PE P-16:0_22:5                  | 11.40 | C <sub>43</sub> H <sub>76</sub> NO <sub>7</sub> P | 750.5461 | 750.5438 | 3.0  | [M+H] <sup>+</sup>  | 266.28461 150.00 sn1 ether +C <sub>2</sub> H <sub>8</sub> NO <sub>3</sub> P-H <sub>3</sub> PO <sub>4</sub><br>364.26151 999.00 sn1 ether + C <sub>2</sub> H <sub>8</sub> NO <sub>3</sub> P (+124)<br>387.29008 200.00 [M+H]-C <sub>2</sub> H <sub>8</sub> NO <sub>4</sub> P-sn2<br>609.52468 30.00 [M+H]-C <sub>2</sub> H <sub>8</sub> NO <sub>4</sub> P (-141)<br>732.53321 100.00 [M+H]-H <sub>2</sub> O (-18)                                                                | /                                                               |
| 18 | PE 18:0_20:5                    | 12.70 | C <sub>43</sub> H <sub>76</sub> NO <sub>8</sub> P | 766.5391 | 766.5357 | 4.3  | [M+H] <sup>+</sup>  | 267.26862 1.00 sn1-O<br>285.22170 1.00 sn2-O<br>464.31426 1.00 [M+H]-sn2-H <sub>2</sub> O<br>482.26734 1.00 [M+H]-sn1-H <sub>2</sub> O<br>482.32482 1.00 [M+H]-sn2<br>500.27790 1.00 [M+H]-sn1<br>625.51961 999.00 [M+H]-C <sub>2</sub> H <sub>8</sub> NO <sub>4</sub> P (-141)<br>748.52814 1.00 [M+H]-H <sub>2</sub> O (-18)                                                                                                                                                  | /                                                               |
| 19 | PE P-18:2 (9, 12)_20:2 (11, 14) | 12.80 | C <sub>43</sub> H <sub>78</sub> NO <sub>7</sub> P | 752.5631 | 752.5594 | 4.9  | [M+H] <sup>+</sup>  | 294.31589 150.00 sn1 ether +C <sub>2</sub> H <sub>8</sub> NO <sub>3</sub> P-H <sub>3</sub> PO <sub>4</sub><br>361.27442 200.00 [M+H]-C <sub>2</sub> H <sub>8</sub> NO <sub>4</sub> P-sn2<br>392.29279 999.00 sn1 ether + C <sub>2</sub> H <sub>8</sub> NO <sub>3</sub> P (+124)<br>611.54030 30.00 [M+H]-C <sub>2</sub> H <sub>8</sub> NO <sub>4</sub> P (-141)<br>734.54883 100.00 [M+H]-H <sub>2</sub> O (-18)                                                                | C <sub>6</sub> H <sub>12</sub> , C <sub>9</sub> H <sub>16</sub> |
| 20 | PE 18:2 (9, 12)_20:2 (11, 14)   | 12.17 | C <sub>43</sub> H <sub>78</sub> NO <sub>8</sub> P | 768.5594 | 768.5543 | 6.6  | [M+H] <sup>+</sup>  | 267.26862 1.00 sn1-O<br>287.23734 1.00 sn2-O<br>464.31425 1.00 [M+H]-sn2-H <sub>2</sub> O<br>482.32481 1.00 [M+H]-sn2<br>484.28297 1.00 [M+H]-sn1-H <sub>2</sub> O<br>502.29353 1.00 [M+H]-sn1<br>627.53523 999.00 [M+H]-C <sub>2</sub> H <sub>8</sub> NO <sub>4</sub> P (-141)<br>750.54377 1.00 [M+H]-H <sub>2</sub> O (-18)                                                                                                                                                  | C <sub>6</sub> H <sub>12</sub> , C <sub>9</sub> H <sub>16</sub> |

|    |                |       |                                                   |          |          |      |                    |                                                                                                                                                                                                                                                                                                                                                                                                                              |   |
|----|----------------|-------|---------------------------------------------------|----------|----------|------|--------------------|------------------------------------------------------------------------------------------------------------------------------------------------------------------------------------------------------------------------------------------------------------------------------------------------------------------------------------------------------------------------------------------------------------------------------|---|
| 21 | PE P-18:0_20:3 | 12.48 | C <sub>43</sub> H <sub>80</sub> NO <sub>7</sub> P | 754.5677 | 754.5751 | -9.8 | [M+H] <sup>+</sup> | 294.31589 150.00 sn1 ether +C <sub>2</sub> H <sub>8</sub> NO <sub>3</sub> P-H <sub>3</sub> PO <sub>4</sub><br>363.29011 200.00 [M+H]-C <sub>2</sub> H <sub>8</sub> NO <sub>4</sub> P-sn <sub>2</sub><br>392.29279 999.00 sn1 ether + C <sub>2</sub> H <sub>8</sub> NO <sub>3</sub> P (+124)<br>613.55599 30.00 [M+H]-C <sub>2</sub> H <sub>8</sub> NO <sub>4</sub> P (-141)<br>736.56452 100.00 [M+H]-H <sub>2</sub> O (-18) | / |
| 22 | PE P-18:0_22:6 | 12.00 | C <sub>45</sub> H <sub>78</sub> NO <sub>7</sub> P | 776.5609 | 776.5594 | 1.9  | [M+H] <sup>+</sup> | 294.31589 150.00 sn1 ether +C <sub>2</sub> H <sub>8</sub> NO <sub>3</sub> P-H <sub>3</sub> PO <sub>4</sub><br>385.27442 200.00 [M+H]-C <sub>2</sub> H <sub>8</sub> NO <sub>4</sub> P-sn <sub>2</sub><br>392.29279 999.00 sn1 ether + C <sub>2</sub> H <sub>8</sub> NO <sub>3</sub> P (+124)<br>635.54030 30.00 [M+H]-C <sub>2</sub> H <sub>8</sub> NO <sub>4</sub> P (-141)<br>758.54883 100.00 [M+H]-H <sub>2</sub> O (-18) | / |
| 23 | PE P-18:0_22:5 | 12.49 | C <sub>45</sub> H <sub>80</sub> NO <sub>7</sub> P | 778.5767 | 778.5751 | 2.1  | [M+H] <sup>+</sup> | 294.31589 150.00 sn1 ether +C <sub>2</sub> H <sub>8</sub> NO <sub>3</sub> P-H <sub>3</sub> PO <sub>4</sub><br>387.29011 200.00 [M+H]-C <sub>2</sub> H <sub>8</sub> NO <sub>4</sub> P-sn <sub>2</sub><br>392.29279 999.00 sn1 ether + C <sub>2</sub> H <sub>8</sub> NO <sub>3</sub> P (+124)<br>637.55599 30.00 [M+H]-C <sub>2</sub> H <sub>8</sub> NO <sub>4</sub> P (-141)<br>760.56452 100.00 [M+H]-H <sub>2</sub> O (-18) | / |
| 24 | PE P-18:0_22:4 | 14.02 | C <sub>45</sub> H <sub>82</sub> NO <sub>7</sub> P | 780.5941 | 780.5907 | 4.4  | [M+H] <sup>+</sup> | 322.34717 150.00 sn1 ether +C <sub>2</sub> H <sub>8</sub> NO <sub>3</sub> P-H <sub>3</sub> PO <sub>4</sub><br>361.27446 200.00 [M+H]-C <sub>2</sub> H <sub>8</sub> NO <sub>4</sub> P-sn <sub>2</sub><br>420.32407 999.00 sn1 ether + C <sub>2</sub> H <sub>8</sub> NO <sub>3</sub> P (+124)<br>639.57162 30.00 [M+H]-C <sub>2</sub> H <sub>8</sub> NO <sub>4</sub> P (-141)<br>762.58015 100.00 [M+H]-H <sub>2</sub> O (-18) | / |

Note: In the first column from right, "-" denotes the saturated lipids and "/" denotes the unsaturated lipids but the C=C bonds positions were not identified. The chemical formulas were simulated based on the exact masses of diagnostic ions P1b (only containing the C and H atoms). The match details in the second column from right include: *m/z* values of product ions, their intensities, and possible explanations. The (1Z)-alkenyl ether (neutral Plasmalogen) species is represented by the "P-" prefix in the second column from left.

**Table S5.** Sphingolipids identified from human serum extract.

| No. | Identification        | RT (min) | Formula                                                         | Observed m/z | Calculated m/z | Error (ppm) | Adduct           | Match details                                                                                                                                                                                                                                                                    | Formula of neutral loss molecules for C=C analysis |
|-----|-----------------------|----------|-----------------------------------------------------------------|--------------|----------------|-------------|------------------|----------------------------------------------------------------------------------------------------------------------------------------------------------------------------------------------------------------------------------------------------------------------------------|----------------------------------------------------|
| 1   | SM d14:1 (4)/18:1 (9) | 7.12     | C <sub>37</sub> H <sub>74</sub> N <sub>2</sub> O <sub>6</sub> P | 673.5318     | 673.5284       | 5.0         | [M] <sup>+</sup> | 490.46240 20.00 [M <sup>+</sup> ]-C <sub>5</sub> H <sub>14</sub> NO <sub>4</sub> P (-183)<br>596.44438 50.00 [M <sup>+</sup> ] (-18 -59)<br>614.45494 10.00 [M <sup>+</sup> ]-C <sub>3</sub> H <sub>9</sub> N (-59)<br>655.51788 999.00 [M <sup>+</sup> ]-H <sub>2</sub> O (-18) | /                                                  |
| 2   | SM d14:0/18:1         | 8.10     | C <sub>37</sub> H <sub>76</sub> N <sub>2</sub> O <sub>6</sub> P | 675.5469     | 675.5441       | 4.1         | [M] <sup>+</sup> | 492.47809 20.00 [M <sup>+</sup> ]-C <sub>5</sub> H <sub>14</sub> NO <sub>4</sub> P (-183)<br>598.46007 50.00 [M <sup>+</sup> ] (-18 -59)<br>616.47063 10.00 [M <sup>+</sup> ]-C <sub>3</sub> H <sub>9</sub> N (-59)<br>657.53357 999.00 [M <sup>+</sup> ]-H <sub>2</sub> O (-18) | /                                                  |
| 3   | SM d14:0/18:0         | 9.50     | C <sub>37</sub> H <sub>78</sub> N <sub>2</sub> O <sub>6</sub> P | 677.5619     | 677.5598       | 3.1         | [M] <sup>+</sup> | 494.49371 20.00 [M <sup>+</sup> ]-C <sub>5</sub> H <sub>14</sub> NO <sub>4</sub> P (-183)<br>600.47569 50.00 [M <sup>+</sup> ] (-18 -59)<br>618.48625 10.00 [M <sup>+</sup> ]-C <sub>3</sub> H <sub>9</sub> N (-59)<br>659.54919 999.00 [M <sup>+</sup> ]-H <sub>2</sub> O (-18) | -                                                  |
| 4   | SM d15:0/18:1         | 9.60     | C <sub>38</sub> H <sub>78</sub> N <sub>2</sub> O <sub>6</sub> P | 689.5620     | 689.5597       | 3.3         | [M] <sup>+</sup> | 506.49371 20.00 [M <sup>+</sup> ]-C <sub>5</sub> H <sub>14</sub> NO <sub>4</sub> P (-183)<br>612.47569 50.00 [M <sup>+</sup> ] (-18 -59)<br>630.48625 10.00 [M <sup>+</sup> ]-C <sub>3</sub> H <sub>9</sub> N (-59)<br>671.54919 999.00 [M <sup>+</sup> ]-H <sub>2</sub> O (-18) | /                                                  |
| 5   | SM d16:1 (4)/18:1 (9) | 8.60     | C <sub>39</sub> H <sub>78</sub> N <sub>2</sub> O <sub>6</sub> P | 701.5625     | 701.5597       | 4.0         | [M] <sup>+</sup> | 518.49371 20.00 [M <sup>+</sup> ]-C <sub>5</sub> H <sub>14</sub> NO <sub>4</sub> P (-183)<br>624.47569 50.00 [M <sup>+</sup> ] (-18 -59)<br>642.48625 10.00 [M <sup>+</sup> ]-C <sub>3</sub> H <sub>9</sub> N (-59)<br>683.54919 999.00 [M <sup>+</sup> ]-H <sub>2</sub> O (-18) | /                                                  |
| 6   | SM d14:1/20:0         | 10.60    | C <sub>39</sub> H <sub>80</sub> N <sub>2</sub> O <sub>6</sub> P | 703.5782     | 703.5754       | 4.0         | [M] <sup>+</sup> | 520.50934 20.00 [M <sup>+</sup> ]-C <sub>5</sub> H <sub>14</sub> NO <sub>4</sub> P (-183)<br>626.49132 50.00 [M <sup>+</sup> ] (-18 -59)<br>644.50188 10.00 [M <sup>+</sup> ]-C <sub>3</sub> H <sub>9</sub> N (-59)<br>685.56482 999.00 [M <sup>+</sup> ]-H <sub>2</sub> O (-18) | /                                                  |
| 7   | SM d14:0/20:0         | 10.30    | C <sub>39</sub> H <sub>82</sub> N <sub>2</sub> O <sub>6</sub> P | 705.5926     | 705.5911       | 2.2         | [M] <sup>+</sup> | 522.52502 20.00 [M <sup>+</sup> ]-C <sub>5</sub> H <sub>14</sub> NO <sub>4</sub> P (-183)<br>628.50700 50.00 [M <sup>+</sup> ] (-18 -59)<br>646.51756 10.00 [M <sup>+</sup> ]-C <sub>3</sub> H <sub>9</sub> N (-59)<br>687.58050 999.00 [M <sup>+</sup> ]-H <sub>2</sub> O (-18) | -                                                  |
| 8   | SM d17:1 (4)/18:1 (9) | 9.90     | C <sub>40</sub> H <sub>80</sub> N <sub>2</sub> O <sub>6</sub> P | 715.5781     | 715.5754       | 3.8         | [M] <sup>+</sup> | 532.50934 20.00 [M <sup>+</sup> ]-C <sub>5</sub> H <sub>14</sub> NO <sub>4</sub> P (-183)<br>638.49132 50.00 [M <sup>+</sup> ] (-18 -59)<br>656.50188 10.00 [M <sup>+</sup> ]-C <sub>3</sub> H <sub>9</sub> N (-59)<br>697.56482 999.00 [M <sup>+</sup> ]-H <sub>2</sub> O (-18) | /                                                  |
| 9   | SM d18:1 (4)/18:1 (9) | 9.95     | C <sub>41</sub> H <sub>82</sub> N <sub>2</sub> O <sub>6</sub> P | 729.5949     | 729.5911       | 5.2         | [M] <sup>+</sup> | 546.52502 20.00 [M <sup>+</sup> ]-C <sub>5</sub> H <sub>14</sub> NO <sub>4</sub> P (-183)<br>652.50700 50.00 [M <sup>+</sup> ] (-18 -59)<br>670.51756 10.00 [M <sup>+</sup> ]-C <sub>3</sub> H <sub>9</sub> N (-59)<br>711.58050 999.00 [M <sup>+</sup> ]-H <sub>2</sub> O (-18) | /                                                  |
| 10  | SM d14:1 (4)/22:0     | 12.10    | C <sub>41</sub> H <sub>84</sub> N <sub>2</sub> O <sub>6</sub> P | 731.6097     | 731.6067       | 4.1         | [M] <sup>+</sup> | 548.54065 20.00 [M <sup>+</sup> ]-C <sub>5</sub> H <sub>14</sub> NO <sub>4</sub> P (-183)<br>654.52263 50.00 [M <sup>+</sup> ] (-18 -59)<br>672.53319 10.00 [M <sup>+</sup> ]-C <sub>3</sub> H <sub>9</sub> N (-59)<br>713.59613 999.00 [M <sup>+</sup> ]-H <sub>2</sub> O (-18) | /                                                  |
| 11  | SM d14:0/22:0         | 11.90    | C <sub>41</sub> H <sub>86</sub> N <sub>2</sub> O <sub>6</sub> P | 733.6249     | 733.6218       | 4.2         | [M] <sup>+</sup> | 550.55634 20.00 [M <sup>+</sup> ]-C <sub>5</sub> H <sub>14</sub> NO <sub>4</sub> P (-183)<br>656.53832 50.00 [M <sup>+</sup> ] (-18 -59)<br>674.54888 10.00 [M <sup>+</sup> ]-C <sub>3</sub> H <sub>9</sub> N (-59)<br>715.61182 999.00 [M <sup>+</sup> ]-H <sub>2</sub> O (-18) | -                                                  |
| 12  | SM d14:1/24:1         | 12.00    | C <sub>43</sub> H <sub>86</sub> N <sub>2</sub> O <sub>6</sub> P | 757.6252     | 757.6224       | 3.7         | [M] <sup>+</sup> | 574.55634 20.00 [M <sup>+</sup> ]-C <sub>5</sub> H <sub>14</sub> NO <sub>4</sub> P (-183)<br>680.53832 50.00 [M <sup>+</sup> ] (-18 -59)<br>698.54888 10.00 [M <sup>+</sup> ]-C <sub>3</sub> H <sub>9</sub> N (-59)<br>739.61182 999.00 [M <sup>+</sup> ]-H <sub>2</sub> O (-18) | /                                                  |
| 13  | SM d14:0/24:1 (15)    | 13.40    | C <sub>43</sub> H <sub>88</sub> N <sub>2</sub> O <sub>6</sub> P | 759.6401     | 759.6380       | 2.8         | [M] <sup>+</sup> | 576.57196 20.00 [M <sup>+</sup> ]-C <sub>5</sub> H <sub>14</sub> NO <sub>4</sub> P (-183)<br>682.55394 50.00 [M <sup>+</sup> ] (-18 -59)<br>700.56450 10.00 [M <sup>+</sup> ]-C <sub>3</sub> H <sub>9</sub> N (-59)<br>741.62744 999.00 [M <sup>+</sup> ]-H <sub>2</sub> O (-18) | /                                                  |
| 14  | SM d14:1/26:1         | 13.03    | C <sub>45</sub> H <sub>90</sub> N <sub>2</sub> O <sub>6</sub> P | 785.6559     | 785.6536       | 2.9         | [M] <sup>+</sup> | 602.58759 20.00 [M <sup>+</sup> ]-C <sub>5</sub> H <sub>14</sub> NO <sub>4</sub> P (-183)<br>708.56957 50.00 [M <sup>+</sup> ] (-18 -59)                                                                                                                                         | /                                                  |

|    |                    |       |                                                                 |          |          |     |                     |  |                                         |                                |
|----|--------------------|-------|-----------------------------------------------------------------|----------|----------|-----|---------------------|--|-----------------------------------------|--------------------------------|
|    |                    |       |                                                                 |          |          |     |                     |  | 726.58013 10.00 [M+]-C3H9N (-59)        |                                |
|    |                    |       |                                                                 |          |          |     |                     |  | 767.64307 999.00 [M+]-H2O (-18)         |                                |
| 15 | SM d16:1/24:1      | 13.32 | C <sub>45</sub> H <sub>90</sub> N <sub>2</sub> O <sub>6</sub> P | 785.6559 | 785.6536 | 2.9 | [M] <sup>+</sup>    |  | 602.58759 20.00 [M+]-C5H14NO4P (-183)   | /                              |
|    |                    |       |                                                                 |          |          |     |                     |  | 708.56957 50.00 [M+]-(-18 -59)          |                                |
|    |                    |       |                                                                 |          |          |     |                     |  | 726.58013 10.00 [M+]-C3H9N (-59)        |                                |
|    |                    |       |                                                                 |          |          |     |                     |  | 767.64307 999.00 [M+]-H2O (-18)         |                                |
| 16 | SM d14:0/26:1 (12) | 14.68 | C <sub>45</sub> H <sub>92</sub> N <sub>2</sub> O <sub>6</sub> P | 787.6738 | 787.6693 | 5.7 | [M] <sup>+</sup>    |  | 604.60327 20.00 [M+]-C5H14NO4P (-183)   | /                              |
|    |                    |       |                                                                 |          |          |     |                     |  | 710.58525 50.00 [M+]-(-18 -59)          |                                |
|    |                    |       |                                                                 |          |          |     |                     |  | 728.59581 10.00 [M+]-C3H9N (-59)        |                                |
|    |                    |       |                                                                 |          |          |     |                     |  | 769.65875 999.00 [M+]-H2O (-18)         |                                |
| 17 | SM d15:0/24:1      | 14.20 | C <sub>44</sub> H <sub>90</sub> N <sub>2</sub> O <sub>6</sub> P | 795.6365 | 795.6356 | 1.2 | [M+Na] <sup>+</sup> |  | 612.56954 20.00 [M+Na]-C5H14NO4P (-183) | /                              |
|    |                    |       |                                                                 |          |          |     |                     |  | 736.56208 999.00 [M+Na]-C3H9N (-59)     |                                |
| 18 | SM d15:1/26:1 (17) | 14.05 | C <sub>46</sub> H <sub>92</sub> N <sub>2</sub> O <sub>6</sub> P | 799.6701 | 799.6693 | 1.0 | [M] <sup>+</sup>    |  | 616.60327 20.00 [M+]-C5H14NO4P (-183)   | C <sub>9</sub> H <sub>18</sub> |
|    |                    |       |                                                                 |          |          |     |                     |  | 722.58525 50.00 [M+]-(-18 -59)          |                                |
|    |                    |       |                                                                 |          |          |     |                     |  | 740.59581 10.00 [M+]-C3H9N (-59)        |                                |
|    |                    |       |                                                                 |          |          |     |                     |  | 781.65875 999.00 [M+]-H2O (-18)         |                                |
| 19 | SM d17:1/24:1 (15) | 13.60 | C <sub>46</sub> H <sub>92</sub> N <sub>2</sub> O <sub>6</sub> P | 799.6709 | 799.6693 | 2.0 | [M] <sup>+</sup>    |  | 616.60327 20.00 [M+]-C5H14NO4P (-183)   | C <sub>9</sub> H <sub>18</sub> |
|    |                    |       |                                                                 |          |          |     |                     |  | 722.58525 50.00 [M+]-(-18 -59)          |                                |
|    |                    |       |                                                                 |          |          |     |                     |  | 740.59581 10.00 [M+]-C3H9N (-59)        |                                |
|    |                    |       |                                                                 |          |          |     |                     |  | 781.65875 999.00 [M+]-H2O (-18)         |                                |
| 20 | SM d15:0/26:1      | 15.40 | C <sub>46</sub> H <sub>94</sub> N <sub>2</sub> O <sub>6</sub> P | 801.6895 | 801.6849 | 5.7 | [M] <sup>+</sup>    |  | 618.61890 20.00 [M+]-C5H14NO4P (-183)   | /                              |
|    |                    |       |                                                                 |          |          |     |                     |  | 724.60088 50.00 [M+]-(-18 -59)          |                                |
|    |                    |       |                                                                 |          |          |     |                     |  | 742.61144 10.00 [M+]-C3H9N (-59)        |                                |
|    |                    |       |                                                                 |          |          |     |                     |  | 783.67438 999.00 [M+]-H2O (-18)         |                                |
| 21 | SM d14:1/26:1      | 13.50 | C <sub>47</sub> H <sub>88</sub> N <sub>2</sub> O <sub>6</sub> P | 807.6357 | 807.6356 | 0.2 | [M+Na] <sup>+</sup> |  | 624.56954 20.00 [M+Na]-C5H14NO4P (-183) | /                              |
|    |                    |       |                                                                 |          |          |     |                     |  | 748.56208 999.00 [M+Na]-C3H9N (-59)     |                                |
| 22 | SM d14:0/26:0      | 12.80 | C <sub>45</sub> H <sub>94</sub> N <sub>2</sub> O <sub>6</sub> P | 811.6695 | 811.6669 | 3.3 | [M+Na] <sup>+</sup> |  | 628.60085 20.00 [M+Na]-C5H14NO4P (-183) | -                              |
|    |                    |       |                                                                 |          |          |     |                     |  | 752.59339 999.00 [M+Na]-C3H9N (-59)     |                                |
| 23 | SM d18:1/24:1      | 14.62 | C <sub>47</sub> H <sub>94</sub> N <sub>2</sub> O <sub>6</sub> P | 813.6871 | 813.6849 | 2.7 | [M] <sup>+</sup>    |  | 630.61890 20.00 [M+]-C5H14NO4P (-183)   | /                              |
|    |                    |       |                                                                 |          |          |     |                     |  | 736.60088 50.00 [M+]-(-18 -59)          |                                |
|    |                    |       |                                                                 |          |          |     |                     |  | 754.61144 10.00 [M+]-C3H9N (-59)        |                                |
|    |                    |       |                                                                 |          |          |     |                     |  | 795.67438 999.00 [M+]-H2O (-18)         |                                |
| 24 | SM d18:1/24:1      | 14.78 | C <sub>47</sub> H <sub>94</sub> N <sub>2</sub> O <sub>6</sub> P | 813.6871 | 813.6849 | 2.7 | [M] <sup>+</sup>    |  | 630.61890 20.00 [M+]-C5H14NO4P (-183)   | /                              |
|    |                    |       |                                                                 |          |          |     |                     |  | 736.60088 50.00 [M+]-(-18 -59)          |                                |
|    |                    |       |                                                                 |          |          |     |                     |  | 754.61144 10.00 [M+]-C3H9N (-59)        |                                |
|    |                    |       |                                                                 |          |          |     |                     |  | 795.67438 999.00 [M+]-H2O (-18)         |                                |
| 25 | SM d18:1/24:1      | 16.02 | C <sub>47</sub> H <sub>96</sub> N <sub>2</sub> O <sub>6</sub> P | 815.7043 | 815.7006 | 4.5 | [M] <sup>+</sup>    |  | 632.63458 20.00 [M+]-C5H14NO4P (-183)   | /                              |
|    |                    |       |                                                                 |          |          |     |                     |  | 738.61656 50.00 [M+]-(-18 -59)          |                                |
|    |                    |       |                                                                 |          |          |     |                     |  | 756.62712 10.00 [M+]-C3H9N (-59)        |                                |
|    |                    |       |                                                                 |          |          |     |                     |  | 797.69006 999.00 [M+]-H2O (-18)         |                                |
| 26 | SM d16:0/26:1      | 15.11 | C <sub>47</sub> H <sub>96</sub> N <sub>2</sub> O <sub>6</sub> P | 815.7043 | 815.7006 | 4.5 | [M] <sup>+</sup>    |  | 632.63458 20.00 [M+]-C5H14NO4P (-183)   | /                              |
|    |                    |       |                                                                 |          |          |     |                     |  | 738.61656 50.00 [M+]-(-18 -59)          |                                |
|    |                    |       |                                                                 |          |          |     |                     |  | 756.62712 10.00 [M+]-C3H9N (-59)        |                                |
|    |                    |       |                                                                 |          |          |     |                     |  | 797.69006 999.00 [M+]-H2O (-18)         |                                |
| 27 | SM d19:1/24:1      | 15.45 | C <sub>48</sub> H <sub>96</sub> N <sub>2</sub> O <sub>6</sub> P | 827.7020 | 827.7006 | 1.7 | [M] <sup>+</sup>    |  | 644.63458 20.00 [M+]-C5H14NO4P (-183)   | /                              |
|    |                    |       |                                                                 |          |          |     |                     |  | 750.61656 50.00 [M+]-(-18 -59)          |                                |
|    |                    |       |                                                                 |          |          |     |                     |  | 768.62712 10.00 [M+]-C3H9N (-59)        |                                |
|    |                    |       |                                                                 |          |          |     |                     |  | 809.69006 999.00 [M+]-H2O (-18)         |                                |
| 28 | SM d17:1/26:1      | 15.23 | C <sub>48</sub> H <sub>96</sub> N <sub>2</sub> O <sub>6</sub> P | 827.7025 | 827.7006 | 2.3 | [M] <sup>+</sup>    |  | 644.63458 20.00 [M+]-C5H14NO4P (-183)   | /                              |
|    |                    |       |                                                                 |          |          |     |                     |  | 750.61656 50.00 [M+]-(-18 -59)          |                                |
|    |                    |       |                                                                 |          |          |     |                     |  | 768.62712 10.00 [M+]-C3H9N (-59)        |                                |
|    |                    |       |                                                                 |          |          |     |                     |  | 809.69006 999.00 [M+]-H2O (-18)         |                                |
| 29 | SM d17:1/26:1      | 14.96 | C <sub>48</sub> H <sub>96</sub> N <sub>2</sub> O <sub>6</sub> P | 827.7025 | 827.7006 | 2.3 | [M] <sup>+</sup>    |  | 644.63458 20.00 [M+]-C5H14NO4P (-183)   | /                              |
|    |                    |       |                                                                 |          |          |     |                     |  | 750.61656 50.00 [M+]-(-18 -59)          |                                |
|    |                    |       |                                                                 |          |          |     |                     |  | 768.62712 10.00 [M+]-C3H9N (-59)        |                                |
|    |                    |       |                                                                 |          |          |     |                     |  | 809.69006 999.00 [M+]-H2O (-18)         |                                |
| 30 | SM d18:1/26:1      | 15.84 | C <sub>49</sub> H <sub>98</sub> N <sub>2</sub> O <sub>6</sub> P | 841.7203 | 841.7163 | 4.8 | [M] <sup>+</sup>    |  | 658.65021 20.00 [M+]-C5H14NO4P (-183)   | /                              |
|    |                    |       |                                                                 |          |          |     |                     |  | 764.63219 50.00 [M+]-(-18 -59)          |                                |
|    |                    |       |                                                                 |          |          |     |                     |  | 782.64275 10.00 [M+]-C3H9N (-59)        |                                |
|    |                    |       |                                                                 |          |          |     |                     |  | 823.70569 999.00 [M+]-H2O (-18)         |                                |

|    |               |       |                                                                  |          |          |     |                  |                                                                                                                                                                                                                                                                                  |   |
|----|---------------|-------|------------------------------------------------------------------|----------|----------|-----|------------------|----------------------------------------------------------------------------------------------------------------------------------------------------------------------------------------------------------------------------------------------------------------------------------|---|
| 31 | SM d18:1/26:0 | 16.81 | C <sub>49</sub> H <sub>100</sub> N <sub>2</sub> O <sub>6</sub> P | 843.7361 | 843.7319 | 5.0 | [M] <sup>+</sup> | 660.66583 20.00 [M <sup>+</sup> ]-C <sub>5</sub> H <sub>14</sub> NO <sub>4</sub> P (-183)<br>766.64781 50.00 [M <sup>+</sup> ] (-18 -59)<br>784.65837 10.00 [M <sup>+</sup> ]-C <sub>3</sub> H <sub>9</sub> N (-59)<br>825.72131 999.00 [M <sup>+</sup> ]-H <sub>2</sub> O (-18) | / |
|----|---------------|-------|------------------------------------------------------------------|----------|----------|-----|------------------|----------------------------------------------------------------------------------------------------------------------------------------------------------------------------------------------------------------------------------------------------------------------------------|---|

Note: In the first column from right, “-” denotes the saturated lipids and “/” denotes the unsaturated lipids but the C=C bonds positions were not identified. The chemical formulas were simulated based on the exact masses of diagnostic ions P1b (only containing the C and H atoms). The match details in the second column from right include: *m/z* values of product ions, their intensities, and possible explanations.

**Table S6.** TG and DG identified from human serum extract.

| No. | Identification                   | RT (min) | Formula                                        | Observed m/z | Calculated m/z | Error (ppm) | Adduct                            | Match details                                                                                                                                                                            | Formula of neutral loss molecules for C=C analysis |
|-----|----------------------------------|----------|------------------------------------------------|--------------|----------------|-------------|-----------------------------------|------------------------------------------------------------------------------------------------------------------------------------------------------------------------------------------|----------------------------------------------------|
| 1   | TG 12:0_12:0_18:1                | 17.19    | C <sub>45</sub> H <sub>84</sub> O <sub>6</sub> | 738.6624     | 738.6608       | 2.2         | [M+NH <sub>4</sub> ] <sup>+</sup> | 439.37850 999.00 [M+NH <sub>4</sub> ]-sn3-18<br>521.45670 999.00 [M+NH <sub>4</sub> ]-sn1-18    [M+NH <sub>4</sub> ]-sn2-18<br>721.65803 199.80 [M+NH <sub>4</sub> ]-17                  | /                                                  |
| 2   | TG 12:0_14:0_16:0                | 17.68    | C <sub>45</sub> H <sub>86</sub> O <sub>6</sub> | 740.6769     | 740.6764       | 0.7         | [M+NH <sub>4</sub> ] <sup>+</sup> | 467.40978 999.00 [M+NH <sub>4</sub> ]-sn3-18<br>495.44106 999.00 [M+NH <sub>4</sub> ]-sn2-18<br>523.47234 999.00 [M+NH <sub>4</sub> ]-sn1-18<br>723.67367 199.80 [M+NH <sub>4</sub> ]-17 | /                                                  |
| 3   | TG 12:0_14:1_18:1                | 17.21    | C <sub>47</sub> H <sub>86</sub> O <sub>6</sub> | 764.6797     | 764.6764       | 4.3         | [M+NH <sub>4</sub> ] <sup>+</sup> | 465.39414 999.00 [M+NH <sub>4</sub> ]-sn3-18<br>521.45670 999.00 [M+NH <sub>4</sub> ]-sn2-18<br>547.47234 999.00 [M+NH <sub>4</sub> ]-sn1-18<br>747.67367 199.80 [M+NH <sub>4</sub> ]-17 | /                                                  |
| 4   | TG 14:0_16:1_14:0                | 17.69    | C <sub>47</sub> H <sub>88</sub> O <sub>6</sub> | 766.6952     | 766.6921       | 4.0         | [M+NH <sub>4</sub> ] <sup>+</sup> | 493.42542 999.00 [M+NH <sub>4</sub> ]-sn3-18<br>495.44106 999.00 [M+NH <sub>4</sub> ]-sn2-18<br>549.48798 999.00 [M+NH <sub>4</sub> ]-sn1-18<br>749.68931 199.80 [M+NH <sub>4</sub> ]-17 | /                                                  |
| 5   | TG 14:1_16:1_16:1                | 17.27    | C <sub>49</sub> H <sub>88</sub> O <sub>6</sub> | 790.6920     | 790.6920       | 0.0         | [M+NH <sub>4</sub> ] <sup>+</sup> | 519.44106 999.00 [M+NH <sub>4</sub> ]-sn2-18    [M+NH <sub>4</sub> ]-sn3-18<br>547.47234 999.00 [M+NH <sub>4</sub> ]-sn1-18<br>773.68931 199.80 [M+NH <sub>4</sub> ]-17                  | /                                                  |
| 6   | TG 12:0_18:1 (15)_16:1 (13)      | 17.70    | C <sub>49</sub> H <sub>90</sub> O <sub>6</sub> | 792.7109     | 792.7077       | 4.0         | [M+NH <sub>4</sub> ] <sup>+</sup> | 493.42542 999.00 [M+NH <sub>4</sub> ]-sn2-18<br>521.45670 999.00 [M+NH <sub>4</sub> ]-sn3-18<br>575.50362 999.00 [M+NH <sub>4</sub> ]-sn1-18<br>775.70495 199.80 [M+NH <sub>4</sub> ]-17 | C <sub>3</sub> H <sub>6</sub>                      |
| 7   | TG 14:0_16:0_16:1                | 18.00    | C <sub>49</sub> H <sub>92</sub> O <sub>6</sub> | 794.7256     | 794.7233       | 2.9         | [M+NH <sub>4</sub> ] <sup>+</sup> | 521.45670 999.00 [M+NH <sub>4</sub> ]-sn2-18<br>523.47234 999.00 [M+NH <sub>4</sub> ]-sn3-18<br>549.48798 999.00 [M+NH <sub>4</sub> ]-sn1-18<br>777.72059 199.80 [M+NH <sub>4</sub> ]-17 | /                                                  |
| 8   | TG 14:0_16:0_16:0                | 18.23    | C <sub>49</sub> H <sub>94</sub> O <sub>6</sub> | 796.7409     | 796.7390       | 2.4         | [M+NH <sub>4</sub> ] <sup>+</sup> | 523.47234 999.00 [M+NH <sub>4</sub> ]-sn2-18    [M+NH <sub>4</sub> ]-sn3-18<br>551.50362 999.00 [M+NH <sub>4</sub> ]-sn1-18<br>779.73623 199.80 [M+NH <sub>4</sub> ]-17                  | -                                                  |
| 9   | TG 14:1 (11)_16:1 (10)_18:1 (12) | 17.71    | C <sub>51</sub> H <sub>92</sub> O <sub>6</sub> | 818.7267     | 818.7233       | 4.2         | [M+NH <sub>4</sub> ] <sup>+</sup> | 519.44106 999.00 [M+NH <sub>4</sub> ]-sn3-18<br>547.47234 999.00 [M+NH <sub>4</sub> ]-sn2-18<br>575.50362 999.00 [M+NH <sub>4</sub> ]-sn1-18<br>801.72059 199.80 [M+NH <sub>4</sub> ]-17 | C <sub>6</sub> H <sub>12</sub>                     |
| 10  | TG 14:0_16:1 (10)_18:1 (11)      | 18.10    | C <sub>51</sub> H <sub>94</sub> O <sub>6</sub> | 820.7413     | 820.7390       | 2.8         | [M+NH <sub>4</sub> ] <sup>+</sup> | 521.45670 999.00 [M+NH <sub>4</sub> ]-sn3-18<br>549.48798 999.00 [M+NH <sub>4</sub> ]-sn2-18<br>575.50362 999.00 [M+NH <sub>4</sub> ]-sn1-18<br>803.73623 199.80 [M+NH <sub>4</sub> ]-17 | C <sub>9</sub> H <sub>18</sub>                     |
| 11  | TG 14:0_16:0_18:1 (11)           | 18.23    | C <sub>51</sub> H <sub>96</sub> O <sub>6</sub> | 822.7571     | 822.7546       | 3.0         | [M+NH <sub>4</sub> ] <sup>+</sup> | 523.47234 999.00 [M+NH <sub>4</sub> ]-sn3-18<br>549.48798 999.00 [M+NH <sub>4</sub> ]-sn2-18<br>577.51926 999.00 [M+NH <sub>4</sub> ]-sn1-18<br>805.75187 199.80 [M+NH <sub>4</sub> ]-17 | C <sub>9</sub> H <sub>18</sub>                     |
| 12  | TG 14:0_16:0_18:0                | 18.39    | C <sub>51</sub> H <sub>98</sub> O <sub>6</sub> | 824.7736     | 824.7702       | 4.1         | [M+NH <sub>4</sub> ] <sup>+</sup> | 551.50362 999.00 [M+NH <sub>4</sub> ]-sn1-18    [M+NH <sub>4</sub> ]-sn2-18<br>   [M+NH <sub>4</sub> ]-sn3-18<br>807.76751 199.80 [M+NH <sub>4</sub> ]-17                                | -                                                  |
| 13  | TG 16:1_16:1_17:1                | 17.89    | C <sub>52</sub> H <sub>94</sub> O <sub>6</sub> | 832.7391     | 832.7390       | 0.1         | [M+NH <sub>4</sub> ] <sup>+</sup> | 547.47234 999.00 [M+NH <sub>4</sub> ]-sn3-18<br>561.48798 999.00 [M+NH <sub>4</sub> ]-sn1-18    [M+NH <sub>4</sub> ]-sn2-18<br>815.73623 199.80 [M+NH <sub>4</sub> ]-17                  | /                                                  |
| 14  | TG 16:0_16:1_17:1                | 18.15    | C <sub>52</sub> H <sub>96</sub> O <sub>6</sub> | 834.7552     | 834.7546       | 0.7         | [M+NH <sub>4</sub> ] <sup>+</sup> | 549.48798 999.00 [M+NH <sub>4</sub> ]-sn3-18<br>561.48798 999.00 [M+NH <sub>4</sub> ]-sn1-18<br>563.50362 999.00 [M+NH <sub>4</sub> ]-sn2-18<br>817.75187 199.80 [M+NH <sub>4</sub> ]-17 | /                                                  |
| 15  | TG 16:0_16:1 (10)_17:0           | 18.31    | C <sub>52</sub> H <sub>98</sub> O <sub>6</sub> | 836.7757     | 836.7702       | 6.6         | [M+NH <sub>4</sub> ] <sup>+</sup> | 549.48798 999.00 [M+NH <sub>4</sub> ]-sn3-18<br>563.50362 999.00 [M+NH <sub>4</sub> ]-sn1-18<br>565.51926 999.00 [M+NH <sub>4</sub> ]-sn2-18<br>819.76751 199.80 [M+NH <sub>4</sub> ]-17 | C <sub>6</sub> H <sub>12</sub>                     |

|    |                                   |       |                                                 |          |          |      |                                   |                                                                                                                                                                                          |                                                                  |
|----|-----------------------------------|-------|-------------------------------------------------|----------|----------|------|-----------------------------------|------------------------------------------------------------------------------------------------------------------------------------------------------------------------------------------|------------------------------------------------------------------|
| 16 | TG 16:0_16:0_17:0                 | 18.45 | C <sub>52</sub> H <sub>100</sub> O <sub>6</sub> | 838.7905 | 838.7859 | 5.5  | [M+NH <sub>4</sub> ] <sup>+</sup> | 551.50362 999.00 [M+NH <sub>4</sub> ]-sn3-18<br>565.51926 999.00 [M+NH <sub>4</sub> ]-sn1-18    [M+NH <sub>4</sub> ]-sn2-18<br>821.78315 199.80 [M+NH <sub>4</sub> ]-17                  | -                                                                |
| 17 | TG 16:1_16:1_18:3                 | 17.40 | C <sub>53</sub> H <sub>92</sub> O <sub>6</sub>  | 842.7288 | 842.7233 | 6.5  | [M+NH <sub>4</sub> ] <sup>+</sup> | 547.47234 999.00 [M+NH <sub>4</sub> ]-sn3-18<br>571.47234 999.00 [M+NH <sub>4</sub> ]-sn1-18    [M+NH <sub>4</sub> ]-sn2-18<br>825.72059 199.80 [M+NH <sub>4</sub> ]-17                  | /                                                                |
| 18 | TG 16:1_16:1_18:2                 | 17.75 | C <sub>53</sub> H <sub>94</sub> O <sub>6</sub>  | 844.7440 | 844.7390 | 5.9  | [M+NH <sub>4</sub> ] <sup>+</sup> | 549.48798 999.00 [M+NH <sub>4</sub> ]-sn3-18<br>571.47234 999.00 [M+NH <sub>4</sub> ]-sn1-18<br>573.48798 999.00 [M+NH <sub>4</sub> ]-sn2-18<br>827.73623 199.80 [M+NH <sub>4</sub> ]-17 | /                                                                |
| 19 | TG 16:0_16:1_18:2                 | 18.20 | C <sub>53</sub> H <sub>96</sub> O <sub>6</sub>  | 846.7584 | 846.7545 | 4.5  | [M+NH <sub>4</sub> ] <sup>+</sup> | 549.48798 999.00 [M+NH <sub>4</sub> ]-sn3-18<br>573.48798 999.00 [M+NH <sub>4</sub> ]-sn1-18<br>575.50362 999.00 [M+NH <sub>4</sub> ]-sn2-18<br>829.75187 199.80 [M+NH <sub>4</sub> ]-17 | /                                                                |
| 20 | TG 16:0_16:1 (9)_18:1 (12)        | 18.02 | C <sub>53</sub> H <sub>98</sub> O <sub>6</sub>  | 848.7660 | 848.7702 | -4.9 | [M+NH <sub>4</sub> ] <sup>+</sup> | 549.48798 999.00 [M+NH <sub>4</sub> ]-sn3-18<br>575.50362 999.00 [M+NH <sub>4</sub> ]-sn1-18<br>577.51926 999.00 [M+NH <sub>4</sub> ]-sn2-18<br>831.76751 199.80 [M+NH <sub>4</sub> ]-17 | C <sub>6</sub> H <sub>12</sub>                                   |
| 21 | TG 16:0_16:0_18:1 (11)            | 18.23 | C <sub>53</sub> H <sub>100</sub> O <sub>6</sub> | 850.7809 | 850.7859 | -5.9 | [M+NH <sub>4</sub> ] <sup>+</sup> | 551.50362 999.00 [M+NH <sub>4</sub> ]-sn3-18<br>577.51926 999.00 [M+NH <sub>4</sub> ]-sn1-18    [M+NH <sub>4</sub> ]-sn2-18<br>833.78315 199.80 [M+NH <sub>4</sub> ]-17                  | C <sub>9</sub> H <sub>18</sub>                                   |
| 22 | TG 16:0_16:0_18:0                 | 18.50 | C <sub>53</sub> H <sub>102</sub> O <sub>6</sub> | 852.8049 | 852.8015 | 4.0  | [M+NH <sub>4</sub> ] <sup>+</sup> | 551.50362 999.00 [M+NH <sub>4</sub> ]-sn3-18<br>579.53490 999.00 [M+NH <sub>4</sub> ]-sn1-18    [M+NH <sub>4</sub> ]-sn2-18<br>835.79879 199.80 [M+NH <sub>4</sub> ]-17                  | -                                                                |
| 23 | TG 16:1_17:1_18:2                 | 17.91 | C <sub>54</sub> H <sub>96</sub> O <sub>6</sub>  | 858.7584 | 858.7546 | 4.4  | [M+NH <sub>4</sub> ] <sup>+</sup> | 561.48798 999.00 [M+NH <sub>4</sub> ]-sn3-18<br>573.48798 999.00 [M+NH <sub>4</sub> ]-sn2-18<br>587.50362 999.00 [M+NH <sub>4</sub> ]-sn1-18<br>841.75187 199.80 [M+NH <sub>4</sub> ]-17 | /                                                                |
| 24 | TG 16:0_17:1 (8)_18:2 (6, 9)      | 18.14 | C <sub>54</sub> H <sub>98</sub> O <sub>6</sub>  | 860.7744 | 860.7702 | 4.9  | [M+NH <sub>4</sub> ] <sup>+</sup> | 563.50362 999.00 [M+NH <sub>4</sub> ]-sn3-18<br>575.50362 999.00 [M+NH <sub>4</sub> ]-sn2-18<br>587.50362 999.00 [M+NH <sub>4</sub> ]-sn1-18<br>843.76751 199.80 [M+NH <sub>4</sub> ]-17 | C <sub>9</sub> H <sub>18</sub> , C <sub>12</sub> H <sub>22</sub> |
| 25 | TG 16:0_17:1 (8)_18:1 (9)         | 18.30 | C <sub>54</sub> H <sub>100</sub> O <sub>6</sub> | 862.7907 | 862.7859 | 5.6  | [M+NH <sub>4</sub> ] <sup>+</sup> | 563.50362 999.00 [M+NH <sub>4</sub> ]-sn3-18<br>577.51926 999.00 [M+NH <sub>4</sub> ]-sn2-18<br>589.51926 999.00 [M+NH <sub>4</sub> ]-sn1-18<br>845.78315 199.80 [M+NH <sub>4</sub> ]-17 | C <sub>9</sub> H <sub>18</sub>                                   |
| 26 | TG 16:0_17:0_18:1                 | 18.45 | C <sub>54</sub> H <sub>102</sub> O <sub>6</sub> | 864.8043 | 864.8015 | 3.2  | [M+NH <sub>4</sub> ] <sup>+</sup> | 565.51926 999.00 [M+NH <sub>4</sub> ]-sn3-18<br>577.51926 999.00 [M+NH <sub>4</sub> ]-sn2-18<br>591.53490 999.00 [M+NH <sub>4</sub> ]-sn1-18<br>847.79879 199.80 [M+NH <sub>4</sub> ]-17 | /                                                                |
| 27 | TG 16:1_18:3_18:3                 | 17.07 | C <sub>55</sub> H <sub>92</sub> O <sub>6</sub>  | 866.7269 | 866.7233 | 4.2  | [M+NH <sub>4</sub> ] <sup>+</sup> | 571.47234 999.00 [M+NH <sub>4</sub> ]-sn2-18    [M+NH <sub>4</sub> ]-sn3-18<br>595.47234 999.00 [M+NH <sub>4</sub> ]-sn1-18<br>849.72059 199.80 [M+NH <sub>4</sub> ]-17                  | /                                                                |
| 28 | TG 16:0_17:0_18:0                 | 18.56 | C <sub>54</sub> H <sub>104</sub> O <sub>6</sub> | 866.8196 | 866.8172 | 2.8  | [M+NH <sub>4</sub> ] <sup>+</sup> | 565.51926 999.00 [M+NH <sub>4</sub> ]-sn3-18<br>579.53490 999.00 [M+NH <sub>4</sub> ]-sn2-18<br>593.55054 999.00 [M+NH <sub>4</sub> ]-sn1-18<br>849.81443 199.80 [M+NH <sub>4</sub> ]-17 | -                                                                |
| 29 | TG 16:1_18:2_18:3                 | 17.58 | C <sub>55</sub> H <sub>94</sub> O <sub>6</sub>  | 868.7429 | 868.7390 | 4.5  | [M+NH <sub>4</sub> ] <sup>+</sup> | 547.47234 999.00 [M+NH <sub>4</sub> ]-sn3-18<br>597.48798 999.00 [M+NH <sub>4</sub> ]-sn1-18    [M+NH <sub>4</sub> ]-sn2-18<br>851.73623 199.80 [M+NH <sub>4</sub> ]-17                  | /                                                                |
| 30 | TG 16:1_18:2_18:3                 | 17.43 | C <sub>55</sub> H <sub>94</sub> O <sub>6</sub>  | 868.7412 | 868.7390 | 2.5  | [M+NH <sub>4</sub> ] <sup>+</sup> | 571.47234 999.00 [M+NH <sub>4</sub> ]-sn2-18<br>573.48798 999.00 [M+NH <sub>4</sub> ]-sn3-18<br>597.48798 999.00 [M+NH <sub>4</sub> ]-sn1-18<br>851.73623 199.80 [M+NH <sub>4</sub> ]-17 | /                                                                |
| 31 | TG 16:1_18:2_18:2                 | 17.81 | C <sub>55</sub> H <sub>96</sub> O <sub>6</sub>  | 870.7575 | 870.7546 | 3.3  | [M+NH <sub>4</sub> ] <sup>+</sup> | 573.48798 999.00 [M+NH <sub>4</sub> ]-sn2-18<br>575.50362 999.00 [M+NH <sub>4</sub> ]-sn3-18<br>597.48798 999.00 [M+NH <sub>4</sub> ]-sn1-18<br>853.75187 199.80 [M+NH <sub>4</sub> ]-17 | /                                                                |
| 32 | TG 16:0_18:2 (9, 12)_18:2 (9, 12) | 18.05 | C <sub>55</sub> H <sub>98</sub> O <sub>6</sub>  | 872.7724 | 872.7702 | 2.5  | [M+NH <sub>4</sub> ] <sup>+</sup> | 575.50362 999.00 [M+NH <sub>4</sub> ]-sn2-18    [M+NH <sub>4</sub> ]-sn3-18<br>599.50362 999.00 [M+NH <sub>4</sub> ]-sn1-18<br>855.76751 199.80 [M+NH <sub>4</sub> ]-17                  | C <sub>9</sub> H <sub>16</sub> , C <sub>6</sub> H <sub>12</sub>  |



|    |                                                         |       |                                                 |          |          |      |                                   |                                                                                                                                                                                          |                                                                                                                                                                   |
|----|---------------------------------------------------------|-------|-------------------------------------------------|----------|----------|------|-----------------------------------|------------------------------------------------------------------------------------------------------------------------------------------------------------------------------------------|-------------------------------------------------------------------------------------------------------------------------------------------------------------------|
| 33 | TG 16:0_18:1 (9)_18:2 (9, 12)                           | 18.30 | C <sub>55</sub> H <sub>100</sub> O <sub>6</sub> | 874.7879 | 874.7859 | 2.3  | [M+NH <sub>4</sub> ] <sup>+</sup> | 575.50362 999.00 [M+NH <sub>4</sub> ]-sn2-18<br>577.51926 999.00 [M+NH <sub>4</sub> ]-sn3-18<br>601.51926 999.00 [M+NH <sub>4</sub> ]-sn1-18<br>857.78315 199.80 [M+NH <sub>4</sub> ]-17 | C <sub>9</sub> H <sub>16</sub> , C <sub>6</sub> H <sub>12</sub>                                                                                                   |
| 34 | TG 16:0_18:1 (9)_18:1 (9) / TG 16:0_18:1 (11)_18:1 (11) | 18.37 | C <sub>55</sub> H <sub>102</sub> O <sub>6</sub> | 876.8051 | 876.8015 | 4.1  | [M+NH <sub>4</sub> ] <sup>+</sup> | 577.51926 999.00 [M+NH <sub>4</sub> ]-sn2-18    [M+NH <sub>4</sub> ]-sn3-18<br>603.53490 999.00 [M+NH <sub>4</sub> ]-sn1-18<br>859.79879 199.80 [M+NH <sub>4</sub> ]-17                  | C <sub>9</sub> H <sub>18</sub> , C <sub>7</sub> H <sub>14</sub>                                                                                                   |
| 35 | TG 16:0_18:0_18:1                                       | 18.51 | C <sub>55</sub> H <sub>104</sub> O <sub>6</sub> | 878.8196 | 878.8172 | 2.7  | [M+NH <sub>4</sub> ] <sup>+</sup> | 577.51926 999.00 [M+NH <sub>4</sub> ]-sn2-18<br>579.53490 999.00 [M+NH <sub>4</sub> ]-sn3-18<br>605.55054 999.00 [M+NH <sub>4</sub> ]-sn1-18<br>861.81443 199.80 [M+NH <sub>4</sub> ]-17 | /                                                                                                                                                                 |
| 36 | TG 16:0_18:0_18:0                                       | 18.62 | C <sub>55</sub> H <sub>106</sub> O <sub>6</sub> | 880.8368 | 880.8328 | 4.5  | [M+NH <sub>4</sub> ] <sup>+</sup> | 579.53490 999.00 [M+NH <sub>4</sub> ]-sn2-18    [M+NH <sub>4</sub> ]-sn3-18<br>607.56618 999.00 [M+NH <sub>4</sub> ]-sn1-18<br>863.83007 199.80 [M+NH <sub>4</sub> ]-17                  | -                                                                                                                                                                 |
| 37 | TG 17:2_18:2_18:2                                       | 17.70 | C <sub>56</sub> H <sub>96</sub> O <sub>6</sub>  | 882.7507 | 882.7546 | -4.4 | [M+NH <sub>4</sub> ] <sup>+</sup> | 585.48798 999.00 [M+NH <sub>4</sub> ]-sn2-18    [M+NH <sub>4</sub> ]-sn3-18<br>599.50362 999.00 [M+NH <sub>4</sub> ]-sn1-18<br>865.75187 199.80 [M+NH <sub>4</sub> ]-17                  | /                                                                                                                                                                 |
| 38 | TG 17:1_18:2_18:2                                       | 18.00 | C <sub>56</sub> H <sub>98</sub> O <sub>6</sub>  | 884.7725 | 884.7703 | 2.5  | [M+NH <sub>4</sub> ] <sup>+</sup> | 587.50362 999.00 [M+NH <sub>4</sub> ]-sn2-18    [M+NH <sub>4</sub> ]-sn3-18<br>599.50362 999.00 [M+NH <sub>4</sub> ]-sn1-18<br>867.76751 199.80 [M+NH <sub>4</sub> ]-17                  | /                                                                                                                                                                 |
| 39 | TG 17:1_18:1_18:2                                       | 18.15 | C <sub>56</sub> H <sub>100</sub> O <sub>6</sub> | 886.7875 | 886.7859 | 1.8  | [M+NH <sub>4</sub> ] <sup>+</sup> | 587.50362 999.00 [M+NH <sub>4</sub> ]-sn2-18<br>589.51926 999.00 [M+NH <sub>4</sub> ]-sn3-18<br>601.51926 999.00 [M+NH <sub>4</sub> ]-sn1-18<br>869.78315 199.80 [M+NH <sub>4</sub> ]-17 | /                                                                                                                                                                 |
| 40 | TG 17:0_18:1 (9)_18:2 (9, 12)                           | 18.31 | C <sub>56</sub> H <sub>102</sub> O <sub>6</sub> | 888.8025 | 888.8015 | 1.1  | [M+NH <sub>4</sub> ] <sup>+</sup> | 589.51926 999.00 [M+NH <sub>4</sub> ]-sn2-18<br>591.53490 999.00 [M+NH <sub>4</sub> ]-sn3-18<br>601.51926 999.00 [M+NH <sub>4</sub> ]-sn1-18<br>871.79879 199.80 [M+NH <sub>4</sub> ]-17 | C <sub>9</sub> H <sub>18</sub> , C <sub>6</sub> H <sub>12</sub> , C <sub>9</sub> H <sub>16</sub>                                                                  |
| 41 | TG 17:0_18:1 (9)_18:1 (9)                               | 18.44 | C <sub>56</sub> H <sub>104</sub> O <sub>6</sub> | 890.8170 | 890.8172 | -0.2 | [M+NH <sub>4</sub> ] <sup>+</sup> | 591.53490 999.00 [M+NH <sub>4</sub> ]-sn2-18    [M+NH <sub>4</sub> ]-sn3-18<br>603.53490 999.00 [M+NH <sub>4</sub> ]-sn1-18<br>873.81443 199.80 [M+NH <sub>4</sub> ]-17                  | C <sub>9</sub> H <sub>18</sub>                                                                                                                                    |
| 42 | TG 18:2_18:3_18:3                                       | 17.07 | C <sub>57</sub> H <sub>94</sub> O <sub>6</sub>  | 892.7433 | 892.7390 | 4.8  | [M+NH <sub>4</sub> ] <sup>+</sup> | 595.47234 999.00 [M+NH <sub>4</sub> ]-sn1-18<br>597.48798 999.00 [M+NH <sub>4</sub> ]-sn2-18    [M+NH <sub>4</sub> ]-sn3-18<br>875.73623 199.80 [M+NH <sub>4</sub> ]-17                  | /                                                                                                                                                                 |
| 43 | TG 17:0_18:0_18:1                                       | 18.20 | C <sub>56</sub> H <sub>106</sub> O <sub>6</sub> | 892.8358 | 892.8328 | 3.3  | [M+NH <sub>4</sub> ] <sup>+</sup> | 591.53490 999.00 [M+NH <sub>4</sub> ]-sn2-18<br>593.55054 999.00 [M+NH <sub>4</sub> ]-sn3-18<br>605.55054 999.00 [M+NH <sub>4</sub> ]-sn1-18<br>875.83007 199.80 [M+NH <sub>4</sub> ]-17 | /                                                                                                                                                                 |
| 44 | TG 18:2 (9, 12)_18:2 (9, 12)_18:3 (9, 12, 15)           | 17.46 | C <sub>57</sub> H <sub>96</sub> O <sub>6</sub>  | 894.7566 | 894.7546 | 2.2  | [M+NH <sub>4</sub> ] <sup>+</sup> | 573.48798 999.00 [M+NH <sub>4</sub> ]-sn3-18<br>597.48798 999.00 [M+NH <sub>4</sub> ]-sn2-18<br>623.50362 999.00 [M+NH <sub>4</sub> ]-sn1-18<br>877.75187 199.80 [M+NH <sub>4</sub> ]-17 | C <sub>3</sub> H <sub>6</sub> , C <sub>6</sub> H <sub>10</sub> , C <sub>9</sub> H <sub>14</sub> , C <sub>6</sub> H <sub>12</sub> , C <sub>9</sub> H <sub>16</sub> |
| 45 | TG 16:0_18:0_19:0                                       | 18.65 | C <sub>56</sub> H <sub>108</sub> O <sub>6</sub> | 894.8528 | 894.8484 | 4.9  | [M+NH <sub>4</sub> ] <sup>+</sup> | 579.53490 999.00 [M+NH <sub>4</sub> ]-sn3-18<br>593.55054 999.00 [M+NH <sub>4</sub> ]-sn2-18<br>621.58182 999.00 [M+NH <sub>4</sub> ]-sn1-18<br>877.84571 199.80 [M+NH <sub>4</sub> ]-17 | -                                                                                                                                                                 |
| 46 | TG 18:2 (9, 12)_18:2 (9, 12)_18:2 (9, 12)               | 17.80 | C <sub>57</sub> H <sub>98</sub> O <sub>6</sub>  | 896.7700 | 896.7702 | -0.2 | [M+NH <sub>4</sub> ] <sup>+</sup> | 599.50362 999.00 [M+NH <sub>4</sub> ]-sn1-18    [M+NH <sub>4</sub> ]-sn2-18<br>   [M+NH <sub>4</sub> ]-sn3-18<br>879.76751 199.80 [M+NH <sub>4</sub> ]-17                                | C <sub>6</sub> H <sub>12</sub> , C <sub>9</sub> H <sub>16</sub>                                                                                                   |
| 47 | TG 18:1_18:2_18:2                                       | 18.05 | C <sub>57</sub> H <sub>100</sub> O <sub>6</sub> | 898.7842 | 898.7859 | -1.9 | [M+NH <sub>4</sub> ] <sup>+</sup> | 599.50362 999.00 [M+NH <sub>4</sub> ]-sn1-18<br>601.51926 999.00 [M+NH <sub>4</sub> ]-sn2-18    [M+NH <sub>4</sub> ]-sn3-18<br>881.78315 199.80 [M+NH <sub>4</sub> ]-17                  | /                                                                                                                                                                 |
| 48 | TG 18:1 (9)_18:1 (9)_18:2 (9, 12)                       | 18.23 | C <sub>57</sub> H <sub>102</sub> O <sub>6</sub> | 900.8008 | 900.8015 | -0.8 | [M+NH <sub>4</sub> ] <sup>+</sup> | 601.51926 999.00 [M+NH <sub>4</sub> ]-sn1-18    [M+NH <sub>4</sub> ]-sn2-18<br>603.53490 999.00 [M+NH <sub>4</sub> ]-sn3-18<br>883.79879 199.80 [M+NH <sub>4</sub> ]-17                  | C <sub>6</sub> H <sub>12</sub> , C <sub>9</sub> H <sub>16</sub> , C <sub>9</sub> H <sub>18</sub>                                                                  |
| 49 | TG 18:1 (9)_18:1 (9)_18:1 (9)                           | 18.40 | C <sub>57</sub> H <sub>104</sub> O <sub>6</sub> | 902.8174 | 902.8172 | 0.3  | [M+NH <sub>4</sub> ] <sup>+</sup> | 603.53490 999.00 [M+NH <sub>4</sub> ]-sn1-18    [M+NH <sub>4</sub> ]-sn2-18<br>   [M+NH <sub>4</sub> ]-sn3-18<br>885.81443 199.80 [M+NH <sub>4</sub> ]-17                                | C <sub>9</sub> H <sub>18</sub>                                                                                                                                    |
| 50 | TG 18:0_18:1_18:1                                       | 18.50 | C <sub>57</sub> H <sub>106</sub> O <sub>6</sub> | 904.8350 | 904.8328 | 2.4  | [M+NH <sub>4</sub> ] <sup>+</sup> | 603.53490 999.00 [M+NH <sub>4</sub> ]-sn1-18<br>605.55054 999.00 [M+NH <sub>4</sub> ]-sn2-18    [M+NH <sub>4</sub> ]-sn3-18<br>887.83007 199.80 [M+NH <sub>4</sub> ]-17                  | /                                                                                                                                                                 |

|    |                                              |       |                                                 |          |          |      |                                   |                                                                                                                                                                                          |                                                                                                                                                                         |
|----|----------------------------------------------|-------|-------------------------------------------------|----------|----------|------|-----------------------------------|------------------------------------------------------------------------------------------------------------------------------------------------------------------------------------------|-------------------------------------------------------------------------------------------------------------------------------------------------------------------------|
| 51 | TG 18:0_18:0_18:1                            | 18.62 | C <sub>57</sub> H <sub>108</sub> O <sub>6</sub> | 906.8516 | 906.8484 | 3.5  | [M+NH <sub>4</sub> ] <sup>+</sup> | 605.55054 999.00 [M+NH <sub>4</sub> ]-sn1-18    [M+NH <sub>4</sub> ]-sn2-18<br>607.56618 999.00 [M+NH <sub>4</sub> ]-sn3-18<br>889.84571 199.80 [M+NH <sub>4</sub> ]-17                  | /                                                                                                                                                                       |
| 52 | TG 18:0_18:0_18:0                            | 18.71 | C <sub>57</sub> H <sub>110</sub> O <sub>6</sub> | 908.8676 | 908.8641 | 3.9  | [M+NH <sub>4</sub> ] <sup>+</sup> | 607.56618 999.00 [M+NH <sub>4</sub> ]-sn1-18    [M+NH <sub>4</sub> ]-sn2-18<br>   [M+NH <sub>4</sub> ]-sn3-18<br>891.86135 199.80 [M+NH <sub>4</sub> ]-17                                | -                                                                                                                                                                       |
| 53 | TG 16:0_17:0_22:0                            | 18.74 | C <sub>58</sub> H <sub>112</sub> O <sub>6</sub> | 912.8018 | 912.8015 | 0.3  | [M+NH <sub>4</sub> ] <sup>+</sup> | 565.51926 999.00 [M+NH <sub>4</sub> ]-sn3-18<br>635.59746 999.00 [M+NH <sub>4</sub> ]-sn2-18<br>649.61310 999.00 [M+NH <sub>4</sub> ]-sn1-18<br>905.87699 199.80 [M+NH <sub>4</sub> ]-17 | -                                                                                                                                                                       |
| 54 | TG 18:2_18:3_20:5                            | 16.97 | C <sub>59</sub> H <sub>94</sub> O <sub>6</sub>  | 916.7426 | 916.7390 | 3.9  | [M+NH <sub>4</sub> ] <sup>+</sup> | 597.48798 999.00 [M+NH <sub>4</sub> ]-sn3-18<br>619.47234 999.00 [M+NH <sub>4</sub> ]-sn1-18<br>621.48798 999.00 [M+NH <sub>4</sub> ]-sn2-18<br>899.73623 199.80 [M+NH <sub>4</sub> ]-17 | /                                                                                                                                                                       |
| 55 | TG 18:2_18:3_20:4                            | 17.33 | C <sub>59</sub> H <sub>96</sub> O <sub>6</sub>  | 918.7552 | 918.7546 | 0.7  | [M+NH <sub>4</sub> ] <sup>+</sup> | 597.48798 999.00 [M+NH <sub>4</sub> ]-sn3-18<br>621.48798 999.00 [M+NH <sub>4</sub> ]-sn1-18<br>623.50362 999.00 [M+NH <sub>4</sub> ]-sn2-18<br>901.75187 199.80 [M+NH <sub>4</sub> ]-17 | /                                                                                                                                                                       |
| 56 | TG 16:0_18:2_22:6                            | 17.84 | C <sub>59</sub> H <sub>98</sub> O <sub>6</sub>  | 920.7692 | 920.7702 | -1.1 | [M+NH <sub>4</sub> ] <sup>+</sup> | 575.50362 999.00 [M+NH <sub>4</sub> ]-sn3-18<br>623.50362 999.00 [M+NH <sub>4</sub> ]-sn2-18<br>647.50362 999.00 [M+NH <sub>4</sub> ]-sn1-18<br>903.76751 199.80 [M+NH <sub>4</sub> ]-17 | /                                                                                                                                                                       |
| 57 | TG 16:1_18:0_21:0                            | 18.66 | C <sub>58</sub> H <sub>112</sub> O <sub>6</sub> | 920.8662 | 920.8641 | 2.3  | [M+NH <sub>4</sub> ] <sup>+</sup> | 565.51926 999.00 [M+NH <sub>4</sub> ]-sn3-18<br>635.59746 999.00 [M+NH <sub>4</sub> ]-sn2-18<br>649.61310 999.00 [M+NH <sub>4</sub> ]-sn1-18<br>905.87699 199.80 [M+NH <sub>4</sub> ]-17 | /                                                                                                                                                                       |
| 58 | TG 18:1 (9)_18:2 (9, 12)_20:4 (5, 8, 11, 14) | 17.96 | C <sub>59</sub> H <sub>100</sub> O <sub>6</sub> | 922.7851 | 922.7859 | -0.9 | [M+NH <sub>4</sub> ] <sup>+</sup> | 603.53490 999.00 [M+NH <sub>4</sub> ]-sn3-18<br>623.50362 999.00 [M+NH <sub>4</sub> ]-sn1-18    [M+NH <sub>4</sub> ]-sn2-18<br>905.78315 199.80 [M+NH <sub>4</sub> ]-17                  | C <sub>6</sub> H <sub>12</sub> , C <sub>9</sub> H <sub>16</sub> , C <sub>12</sub> H <sub>20</sub> ,<br>C <sub>15</sub> H <sub>24</sub> , C <sub>9</sub> H <sub>18</sub> |
| 59 | TG 18:1 (9)_18:2 (9, 12)_20:3 (8, 11, 14)    | 18.17 | C <sub>59</sub> H <sub>102</sub> O <sub>6</sub> | 924.7965 | 924.8015 | -5.4 | [M+NH <sub>4</sub> ] <sup>+</sup> | 603.53490 999.00 [M+NH <sub>4</sub> ]-sn3-18<br>625.51926 999.00 [M+NH <sub>4</sub> ]-sn1-18    [M+NH <sub>4</sub> ]-sn2-18<br>907.79879 199.80 [M+NH <sub>4</sub> ]-17                  | C <sub>6</sub> H <sub>12</sub> O, C <sub>9</sub> H <sub>16</sub> O, C <sub>9</sub> H <sub>18</sub> O                                                                    |
| 60 | TG 18:0_18:1 (12)_20:4 (5, 8, 11, 14)        | 18.31 | C <sub>59</sub> H <sub>104</sub> O <sub>6</sub> | 926.8163 | 926.8172 | -1.0 | [M+NH <sub>4</sub> ] <sup>+</sup> | 605.55054 999.00 [M+NH <sub>4</sub> ]-sn3-18<br>625.51926 999.00 [M+NH <sub>4</sub> ]-sn1-18<br>627.53490 999.00 [M+NH <sub>4</sub> ]-sn2-18<br>909.81443 199.80 [M+NH <sub>4</sub> ]-17 | C <sub>6</sub> H <sub>12</sub> , C <sub>9</sub> H <sub>16</sub> , C <sub>12</sub> H <sub>20</sub> , C <sub>15</sub> H <sub>24</sub>                                     |
| 61 | TG 18:1_18:2_20:1                            | 18.37 | C <sub>59</sub> H <sub>106</sub> O <sub>6</sub> | 928.8315 | 928.8328 | -1.4 | [M+NH <sub>4</sub> ] <sup>+</sup> | 601.51926 999.00 [M+NH <sub>4</sub> ]-sn3-18<br>629.55054 999.00 [M+NH <sub>4</sub> ]-sn1-18<br>631.56618 999.00 [M+NH <sub>4</sub> ]-sn2-18<br>911.83007 199.80 [M+NH <sub>4</sub> ]-17 | /                                                                                                                                                                       |
| 62 | TG 18:1_18:1_20:1                            | 18.50 | C <sub>59</sub> H <sub>108</sub> O <sub>6</sub> | 930.8444 | 930.8484 | -4.3 | [M+NH <sub>4</sub> ] <sup>+</sup> | 603.53490 999.00 [M+NH <sub>4</sub> ]-sn3-18<br>631.56618 999.00 [M+NH <sub>4</sub> ]-sn1-18    [M+NH <sub>4</sub> ]-sn2-18<br>913.84571 199.80 [M+NH <sub>4</sub> ]-17                  | /                                                                                                                                                                       |
| 63 | TG 20:0_16:1_20:1                            | 18.60 | C <sub>59</sub> H <sub>110</sub> O <sub>6</sub> | 932.8651 | 932.8641 | 1.1  | [M+NH <sub>4</sub> ] <sup>+</sup> | 603.53490 999.00 [M+NH <sub>4</sub> ]-sn3-18<br>633.58182 999.00 [M+NH <sub>4</sub> ]-sn1-18    [M+NH <sub>4</sub> ]-sn2-18<br>915.86135 199.80 [M+NH <sub>4</sub> ]-17                  | /                                                                                                                                                                       |
| 64 | TG 18:0_18:1_20:0                            | 18.70 | C <sub>59</sub> H <sub>112</sub> O <sub>6</sub> | 934.8815 | 934.8797 | 1.9  | [M+NH <sub>4</sub> ] <sup>+</sup> | 605.55054 999.00 [M+NH <sub>4</sub> ]-sn3-18<br>633.58182 999.00 [M+NH <sub>4</sub> ]-sn1-18<br>635.59746 999.00 [M+NH <sub>4</sub> ]-sn2-18<br>917.87699 199.80 [M+NH <sub>4</sub> ]-17 | /                                                                                                                                                                       |
| 65 | TG 18:0_16:0_22:0                            | 18.80 | C <sub>59</sub> H <sub>114</sub> O <sub>6</sub> | 936.8981 | 936.8954 | 3.0  | [M+NH <sub>4</sub> ] <sup>+</sup> | 579.53490 999.00 [M+NH <sub>4</sub> ]-sn3-18<br>649.61310 999.00 [M+NH <sub>4</sub> ]-sn1-18    [M+NH <sub>4</sub> ]-sn2-18<br>919.89263 199.80 [M+NH <sub>4</sub> ]-17                  | -                                                                                                                                                                       |
| 66 | TG 18:2_18:3_22:6                            | 17.15 | C <sub>61</sub> H <sub>96</sub> O <sub>6</sub>  | 942.7576 | 942.7546 | 3.2  | [M+NH <sub>4</sub> ] <sup>+</sup> | 597.48798 999.00 [M+NH <sub>4</sub> ]-sn3-18<br>645.48798 999.00 [M+NH <sub>4</sub> ]-sn1-18<br>647.50362 999.00 [M+NH <sub>4</sub> ]-sn2-18<br>925.75187 199.80 [M+NH <sub>4</sub> ]-17 | /                                                                                                                                                                       |
| 67 | TG 18:2_18:2_22:6                            | 17.50 | C <sub>61</sub> H <sub>98</sub> O <sub>6</sub>  | 944.7717 | 944.7702 | 1.6  | [M+NH <sub>4</sub> ] <sup>+</sup> | 599.50362 999.00 [M+NH <sub>4</sub> ]-sn3-18<br>647.50362 999.00 [M+NH <sub>4</sub> ]-sn1-18    [M+NH <sub>4</sub> ]-sn2-18<br>927.76751 199.80 [M+NH <sub>4</sub> ]-17                  | /                                                                                                                                                                       |

|    |                   |       |                                                 |          |          |     |                                   |                                                                                                                                                                                                                                           |   |
|----|-------------------|-------|-------------------------------------------------|----------|----------|-----|-----------------------------------|-------------------------------------------------------------------------------------------------------------------------------------------------------------------------------------------------------------------------------------------|---|
| 68 | TG 18:2_18:2_22:5 | 17.84 | C <sub>61</sub> H <sub>100</sub> O <sub>6</sub> | 946.7875 | 946.7859 | 1.7 | [M+NH <sub>4</sub> ] <sup>+</sup> | 601.51926 999.00 [M+NH <sub>4</sub> ]-sn3-18<br>647.50362 999.00 [M+NH <sub>4</sub> ]-sn1-18<br>649.51926 999.00 [M+NH <sub>4</sub> ]-sn2-18<br>929.78315 199.80 [M+NH <sub>4</sub> ]-17                                                  | / |
| 69 | TG 18:1_18:1_22:6 | 18.07 | C <sub>61</sub> H <sub>102</sub> O <sub>6</sub> | 948.8015 | 948.8015 | 0.0 | [M+NH <sub>4</sub> ] <sup>+</sup> | 603.53490 999.00 [M+NH <sub>4</sub> ]-sn3-18<br>649.51926 999.00 [M+NH <sub>4</sub> ]-sn1-18    [M+NH <sub>4</sub> ]-sn2-18<br>931.79879 199.80 [M+NH <sub>4</sub> ]-17                                                                   | / |
| 70 | DG 18:2_18:2      | 11.30 | C <sub>39</sub> H <sub>68</sub> O <sub>5</sub>  | 634.5427 | 634.5407 | 3.2 | [M+NH <sub>4</sub> ] <sup>+</sup> | 337.27410 999.00 [M+NH <sub>4</sub> ]-sn1    [M+NH <sub>4</sub> ]-sn2<br>599.52743 500.00 [M+NH <sub>4</sub> ]-NH <sub>4</sub> -H <sub>2</sub> O (-17-18)<br>617.53799 200.00 [M+NH <sub>4</sub> ]-NH <sub>4</sub> (-17)                  | / |
| 71 | DG 18:1_18:2      | 13.10 | C <sub>39</sub> H <sub>70</sub> O <sub>5</sub>  | 636.5573 | 636.5564 | 1.5 | [M+NH <sub>4</sub> ] <sup>+</sup> | 337.27410 999.00 [M+NH <sub>4</sub> ]-sn1<br>339.28974 999.00 [M+NH <sub>4</sub> ]-sn2<br>601.54307 500.00 [M+NH <sub>4</sub> ]-NH <sub>4</sub> -H <sub>2</sub> O (-17-18)<br>619.55363 200.00 [M+NH <sub>4</sub> ]-NH <sub>4</sub> (-17) | / |
| 72 | DG 18:1_18:1      | 13.84 | C <sub>39</sub> H <sub>72</sub> O <sub>5</sub>  | 638.5778 | 638.5720 | 9.1 | [M+NH <sub>4</sub> ] <sup>+</sup> | 339.28974 999.00 [M+NH <sub>4</sub> ]-sn1    [M+NH <sub>4</sub> ]-sn2<br>603.55871 500.00 [M+NH <sub>4</sub> ]-NH <sub>4</sub> -H <sub>2</sub> O (-17-18)<br>621.56927 200.00 [M+NH <sub>4</sub> ]-NH <sub>4</sub> (-17)                  | / |

Note: In the first column from right, “-” denotes the saturated lipids and “/” denotes the unsaturated lipids but the C=C bonds positions were not identified. The chemical formulas were simulated based on the exact masses of diagnostic ions P1b (only containing the C and H atoms). The match details in the second column from right include: *m/z* values of product ions, their intensities, and possible explanations.

**Table S7.** Ceramide identified from human serum extract.

| No. | Identification | RT (min) | Formula                                         | Observed m/z | Calculated m/z | Error (ppm) | Adduct             | Match details                                                                             | Formula of neutral loss molecules for C=C analysis |
|-----|----------------|----------|-------------------------------------------------|--------------|----------------|-------------|--------------------|-------------------------------------------------------------------------------------------|----------------------------------------------------|
| 1   | Cer d18:0/22:0 | 16.40    | C <sub>40</sub> H <sub>81</sub> NO <sub>3</sub> | 624.6296     | 624.6296       | 0.0         | [M+H] <sup>+</sup> | 266.24837 999.00 LCB sphingo-base<br>284.25893 100.00 LCB sphingo-base + H <sub>2</sub> O | -                                                  |
| 2   | Cer d18:1/16:0 | 1.61     | C <sub>34</sub> H <sub>67</sub> NO <sub>3</sub> | 538.5219     | 538.5194       | 4.6         | [M+H] <sup>+</sup> | -                                                                                         | /                                                  |

Note: In the first column from right, “-” denotes the saturated lipids and “/” denotes the unsaturated lipids but the C=C bonds positions were not identified. The chemical formulas were simulated based on the exact masses of diagnostic ions P1b (only containing the C and H atoms). The match details in the second column from right include: *m/z* values of product ions, their intensities, and possible explanations.

**Table S8.** FA identified from human serum extract.

| NO. | Identification               | RT (min) | Formula                                        | Observed m/z | Calculated m/z | Error (ppm) | Adduct             | Formula of neutral loss molecules for C=C analysis                                                                                                                  |
|-----|------------------------------|----------|------------------------------------------------|--------------|----------------|-------------|--------------------|---------------------------------------------------------------------------------------------------------------------------------------------------------------------|
| 1   | 16: 0                        | 4.89     | C <sub>16</sub> H <sub>32</sub> O <sub>2</sub> | 255.2317     | 255.2318       | -0.4        | [M-H] <sup>-</sup> | -                                                                                                                                                                   |
| 2   | 16: 1 (9/11)                 | 3.51     | C <sub>16</sub> H <sub>30</sub> O <sub>2</sub> | 253.2168     | 253.2162       | 2.4         | [M-H] <sup>-</sup> | C <sub>7</sub> H <sub>14</sub> , C <sub>5</sub> H <sub>10</sub>                                                                                                     |
| 3   | 18: 0                        | 6.27     | C <sub>18</sub> H <sub>36</sub> O <sub>2</sub> | 283.2629     | 283.2631       | -0.7        | [M-H] <sup>-</sup> | -                                                                                                                                                                   |
| 4   | 18: 1 (9/11)                 | 5.06     | C <sub>18</sub> H <sub>34</sub> O <sub>2</sub> | 281.2471     | 281.2475       | -1.4        | [M-H] <sup>-</sup> | C <sub>11</sub> H <sub>22</sub> , C <sub>9</sub> H <sub>18</sub>                                                                                                    |
| 5   | 18: 2 (9, 12)                | 3.92     | C <sub>18</sub> H <sub>32</sub> O <sub>2</sub> | 279.2323     | 279.2319       | 1.4         | [M-H] <sup>-</sup> | C <sub>6</sub> H <sub>12</sub> , C <sub>9</sub> H <sub>16</sub>                                                                                                     |
| 6   | 18: 3 (9, 12, 15)            | 2.84     | C <sub>18</sub> H <sub>30</sub> O <sub>2</sub> | 277.2166     | 277.2162       | 1.4         | [M-H] <sup>-</sup> | C <sub>3</sub> H <sub>6</sub> , C <sub>6</sub> H <sub>10</sub> , C <sub>9</sub> H <sub>14</sub>                                                                     |
| 7   | 20: 0                        | 7.51     | C <sub>20</sub> H <sub>40</sub> O <sub>2</sub> | 311.2947     | 311.2944       | 1.0         | [M-H] <sup>-</sup> | -                                                                                                                                                                   |
| 8   | 20: 1 (11/13)                | 6.31     | C <sub>20</sub> H <sub>38</sub> O <sub>2</sub> | 309.2787     | 309.2788       | -0.3        | [M-H] <sup>-</sup> | C <sub>9</sub> H <sub>18</sub> , C <sub>7</sub> H <sub>14</sub>                                                                                                     |
| 9   | 20: 2 (11, 14)               | 5.32     | C <sub>20</sub> H <sub>36</sub> O <sub>2</sub> | 307.2636     | 307.2632       | 1.3         | [M-H] <sup>-</sup> | C <sub>6</sub> H <sub>12</sub> , C <sub>9</sub> H <sub>16</sub>                                                                                                     |
| 10  | 20: 3 (8, 11, 14)            | 4.39     | C <sub>20</sub> H <sub>34</sub> O <sub>2</sub> | 305.2478     | 305.2475       | 1.0         | [M-H] <sup>-</sup> | C <sub>6</sub> H <sub>12</sub> , C <sub>9</sub> H <sub>16</sub>                                                                                                     |
| 11  | 20: 4 (5, 8, 11, 14)         | 3.67     | C <sub>20</sub> H <sub>32</sub> O <sub>2</sub> | 303.2322     | 303.2319       | 1.0         | [M-H] <sup>-</sup> | C <sub>6</sub> H <sub>12</sub> , C <sub>9</sub> H <sub>16</sub> , C <sub>12</sub> H <sub>20</sub> , C <sub>15</sub> H <sub>24</sub>                                 |
| 12  | 22: 1 (13)                   | 7.51     | C <sub>22</sub> H <sub>42</sub> O <sub>2</sub> | 337.3103     | 337.3103       | 0.0         | [M-H] <sup>-</sup> | C <sub>9</sub> H <sub>18</sub>                                                                                                                                      |
| 13  | 22: 4 (7, 10, 13, 16)        | 4.84     | C <sub>22</sub> H <sub>36</sub> O <sub>2</sub> | 331.2629     | 331.2632       | -0.9        | [M-H] <sup>-</sup> | C <sub>6</sub> H <sub>12</sub> , C <sub>9</sub> H <sub>16</sub> , C <sub>12</sub> H <sub>20</sub> , C <sub>15</sub> H <sub>24</sub>                                 |
| 14  | 22: 5 (7, 10, 13, 16, 19)    | 4.32     | C <sub>22</sub> H <sub>34</sub> O <sub>2</sub> | 329.2474     | 329.2475       | -0.3        | [M-H] <sup>-</sup> | C <sub>3</sub> H <sub>6</sub> , C <sub>6</sub> H <sub>10</sub> , C <sub>9</sub> H <sub>14</sub> , C <sub>12</sub> H <sub>18</sub> , C <sub>15</sub> H <sub>22</sub> |
| 15  | 22: 6 (4, 7, 10, 13, 16, 19) | 3.36     | C <sub>22</sub> H <sub>32</sub> O <sub>2</sub> | 327.2324     | 327.2319       | 1.5         | [M-H] <sup>-</sup> | C <sub>3</sub> H <sub>6</sub> , C <sub>6</sub> H <sub>10</sub> , C <sub>9</sub> H <sub>14</sub> , C <sub>12</sub> H <sub>18</sub> , C <sub>15</sub> H <sub>22</sub> |

Note: In the first column from right, "-" denotes the saturated lipids. The chemical formulas were simulated based on the exact masses of diagnostic ions P1b (only containing the C and H atoms). The match details in the second column from right include: *m/z* values of product ions, their intensities, and possible explanations.
